# Supplementary material for: Catalytic stereoselective cascade reactions of quinols with trifluoromethyl ketones: direct access to CF3-containing 1,3-dioxolanes
Source: Royal Society of Chemistry journal article supplement (doi:10.1039/c6ob00281a), 2016-01-01
Supplement: c6ob00281a1.pdf [file c6ob00281a1.pdf]

# Supporting Information

## Catalytic Stereoselective Cascade Reactions of Quinolins with Trifluoromethyl Ketones: Direct Access to CF<sub>3</sub>-containing 1,3- dioxolanes

Feng Li, Jingjing Wang,\* Mengmeng Xu, Xiaobo Zhao, Xiaohong  
Zhou, Wen-Xian Zhao, and Lantao Liu\*

*College of Chemistry and Chemical Engineering, Shangqiu Normal University, 298*

*Wenhua Road, Shangqiu, Henan 476000, China*

Email: [wangjingjing0918@163.com](mailto:wangjingjing0918@163.com) or [liult05@iccas.ac.cn](mailto:liult05@iccas.ac.cn)

### Table of Contents

|                                     |       |
|-------------------------------------|-------|
| Experimental Section                | 1–15  |
| Copies of HPLC Spectra              | 16    |
| Copies of NMR Spectra               | 17–48 |
| Crystallographic data for <b>3a</b> | 49–55 |

### General information:

$^1\text{H}$ ,  $^{13}\text{C}$ , and  $^{19}\text{F}$  were recorded at Bruker 400 MHz ( $^1\text{H}$  NMR), 100 MHz ( $^{13}\text{C}$  NMR), as well as 376 MHz ( $^{19}\text{F}$  NMR). Chemical shifts were reported in ppm from the solvent resonance as the internal standard ( $\text{CDCl}_3$ : 7.26 ppm, 77.0 ppm). For  $^{19}\text{F}$  NMR, the (trifluoromethyl)benzene ( $\delta = -63.72$ ) was used as an external standard. Multiplicity was indicated as follows: s (singlet), d (doublet), t (triplet), q (quartet), m (multiplet), dd (doublet of doublet), br (broad). Coupling constants were reported in Hertz (Hz). IR spectra were recorded on an AVATAR 360 FT-IR spectrometer. HRMS were recorded on an APEXIII 7.0 TESLA FTMS (ESI resource). X-ray structural analysis was conducted on the XtaLAB mini (600 W, CCD, 75mm, 0.1 electrons / pixel / sec). Chiral HPLC analysis were carried out on a Agilent 1260 infinity instrument with commercial ChiralPak columns and hexane and isopropyl alcohol as eluents.

**Materials:** All commercially available reagents and solvent were used without further purification. Analytical thin layer chromatography was performed on 0.25 mm silica gel plates. Silica gel (200-300 mesh) was used for flash chromatography. Trifluoromethyl ketones<sup>[1]</sup> and *p*-Quinols<sup>[2]</sup> were prepared according to literatures.

### General procedure for the ketalization/oxa-Michael cascade of *p*-Quinols with Trifluoromethyl ketones:

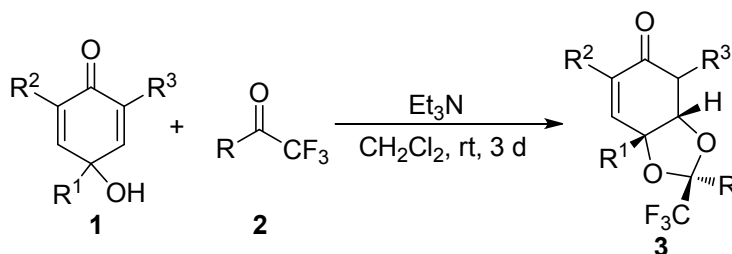

To a solution of the *p*-Quinol **1** (0.3 mmol) and trifluoromethyl ketone **2** (0.36 mmol) in CH<sub>2</sub>Cl<sub>2</sub> (1.0 mL) was added Et<sub>3</sub>N (0.06 mmol, 20 mol%) via a syringe in one portion. Then the mixture was vigorously stirred at room temperature for 3 days. After the reaction was complete, the mixture was directly purified by column

chromatography on silica gel (petroleum ether/EtOAc as the eluent) to furnish the corresponding products **3**.

### Screening of the catalyst for the enantioselective ketalization/oxa-Michael cascade<sup>a</sup>

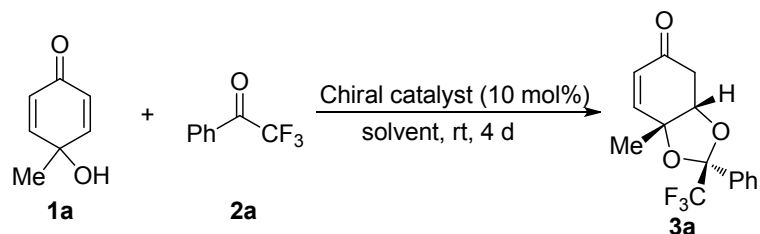

| Entry | Chiral catalyst         | Solvent                         | Yield <sup>b</sup> | ee <sup>c</sup> | dr <sup>d</sup> |
|-------|-------------------------|---------------------------------|--------------------|-----------------|-----------------|
| 1     | Cinchonine-thiourea     | CH <sub>2</sub> Cl <sub>2</sub> | 89                 | -25             | 94:6            |
| 2     | Quinine-thiourea        | CH <sub>2</sub> Cl <sub>2</sub> | 84                 | -3              | 92:8            |
| 3     | (DHQD) <sub>2</sub> AQN | CH <sub>2</sub> Cl <sub>2</sub> | 91                 | -74             | 90:10           |
| 4     | (DHQ) <sub>2</sub> AQN  | CH <sub>2</sub> Cl <sub>2</sub> | 90                 | 60              | 95:5            |
| 5     | (DHQ) <sub>2</sub> PHAL | CH <sub>2</sub> Cl <sub>2</sub> | 92                 | 80              | 97:3            |

<sup>a</sup> Reaction conditions: **1a** (0.10 mmol), **2a** (0.15 mmol), chiral catalyst (10 mol %), solvent (1.0 mL), rt, 4 d; <sup>b</sup> Isolated yields; <sup>c</sup> Values are for the major diastereomers of **3a**; <sup>d</sup> Diastereomeric ratios were determined by <sup>19</sup>F NMR.

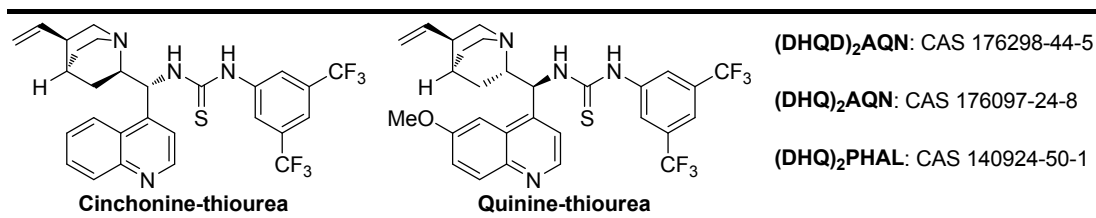

### General procedure for the enantioselective ketalization/oxa-Michael cascade of *p*-Quinol **1a** with Trifluoromethyl ketone **2a**:

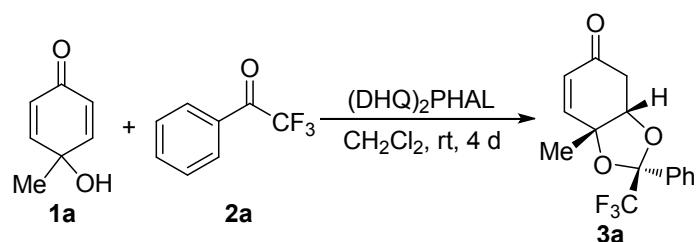

To a solution of the **1a** (0.1 mmol) and **2a** (0.15 mmol) in CH<sub>2</sub>Cl<sub>2</sub> (1.0 mL) was added (DHQ)<sub>2</sub>PHAL (7.8 mg, 0.01 mmol, 10 mol%). Then the mixture was vigorously

stirred at room temperature for 4 days. After the reaction was complete, the mixture was directly purified by column chromatography on silica gel (petroleum ether/EtOAc as the eluent) to give the desired product **3a** as white solid.

27.4 mg, 92% yield; 80% ee; 97:3 dr; [Determined by HPLC analysis Chiralcel IB column, Hexane/*i*-PrOH = 90/10, Flow rate: 0.8 mL/min, UV detection at 254 nm, Retention time:  $t_{\text{major}}=9.370$  min,  $t_{\text{minor}}=8.254$  min].

**7a-methyl-2-phenyl-2-(trifluoromethyl)-3a,4-dihydrobenzo[d][1,3]dioxol-5(7aH)-one:**

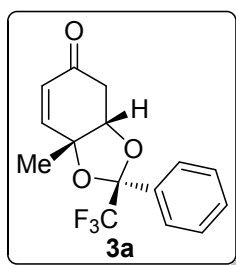

White solid; 80.6 mg, 90% yield; 82:18 dr; mp 62–65 °C;  $^1\text{H NMR}$  (400 MHz,  $\text{CDCl}_3$ )  $\delta$  1.60 (s, 3H), 2.61 (dd,  $J = 18.0$  Hz, 3.2 Hz, 1H), 3.05 (d,  $J = 20.0$  Hz, 1H), 4.67 (d,  $J = 3.2$  Hz, 1H), 5.58 (d,  $J = 10.4$  Hz, 1H), 6.25 (dd,  $J = 10.4$  Hz, 2.0 Hz, 1H), 7.28–7.34 (m, 3H), 7.48 (d,  $J = 7.2$  Hz, 2H);  $^{13}\text{C NMR}$  (100 MHz,  $\text{CDCl}_3$ )  $\delta$  193.6, 147.3, 134.4, 129.4, 127.8, 127.6, 126.5, 122.4 (q,  $J_{\text{C-F}} = 286.4$  Hz), 103.6 (q,  $J_{\text{C-F}} = 32.1$  Hz), 81.5, 78.9, 37.7, 20.9; **IR** (KBr)  $\nu$  2981, 2933, 1694, 1451, 1389, 1262, 1241, 1176, 1096, 1053, 957, 719  $\text{cm}^{-1}$ ;  $^{19}\text{F NMR}$  (376 MHz,  $\text{CDCl}_3$ )  $\delta$  -82.36 (s, 2.46F), -81.30 (s, 0.54F); **HRMS** (ESI) found:  $m/z$  321.0717  $[\text{M}+\text{Na}]^+$ ; calcd. for  $\text{C}_{15}\text{H}_{13}\text{F}_3\text{O}_3+\text{Na}$  321.0714.

**7a-methyl-2-(p-tolyl)-2-(trifluoromethyl)-3a,4-dihydrobenzo[d][1,3]dioxol-5(7aH)-one:**

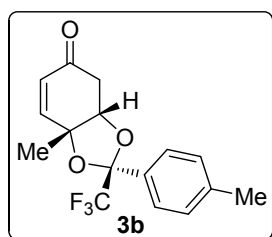

White solid; 81.5 mg, 87% yield; 78:22 dr; mp 45–47 °C;  $^1\text{H NMR}$  (400 MHz,  $\text{CDCl}_3$ )  $\delta$  1.60 (s, 3H), 2.32 (s, 3H), 2.62 (dd,  $J = 18.4$  Hz, 1H), 3.06 (d,  $J = 18.4$  Hz, 1H), 4.66 (s, 1H), 5.61 (d,  $J = 10.4$  Hz, 1H), 6.27 (dd,  $J = 10.4$  Hz, 2.0 Hz, 1H), 7.12 (d,  $J = 8.0$  Hz, 2H), 7.36 (d,  $J = 7.6$  Hz, 2H);  $^{13}\text{C NMR}$  (100 MHz,  $\text{CDCl}_3$ )  $\delta$  193.8, 147.5, 139.4, 131.5, 128.5, 127.6, 126.4, 122.4 (q,  $J_{\text{C-F}} = 286.7$  Hz), 103.6 (q,  $J_{\text{C-F}} = 32.2$  Hz), 81.5, 78.9, 37.7, 21.1, 21.0; **IR** (KBr)  $\nu$  2979, 2928, 1694, 1616, 1515, 1456, 1387, 1310, 1241, 1178, 1094, 1049, 961, 941, 824, 734  $\text{cm}^{-1}$ ;  $^{19}\text{F NMR}$  (376 MHz,  $\text{CDCl}_3$ )  $\delta$  -82.44 (s, 2.34F), -81.42 (s, 0.66F); **HRMS** (ESI) found:  $m/z$  335.0870  $[\text{M}+\text{Na}]^+$ ; calcd. for  $\text{C}_{16}\text{H}_{15}\text{F}_3\text{O}_3+\text{Na}$  335.0871.

**2-(4-methoxyphenyl)-7a-methyl-2-(trifluoromethyl)-3a,4-dihydrobenzo[d][1,3]dioxol-5(7aH)-one:**

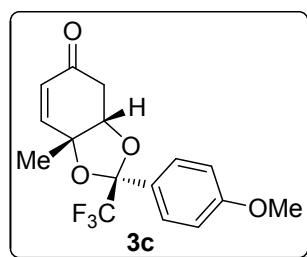

Colorless oily liquid; 79.6 mg, 81% yield; 82:18 dr;  $^1\text{H NMR}$  (400 MHz,  $\text{CDCl}_3$ )  $\delta$  1.59 (s, 3H), 2.61 (dd,  $J = 18.0$  Hz, 3.2 Hz, 1H), 3.05 (d,  $J = 18.0$  Hz, 1H), 3.77 (s, 3H), 4.65 (s, 1H), 5.62 (d,  $J = 10.0$  Hz, 1H), 6.26 (dd,  $J = 10.4$  Hz, 1.6 Hz, 1H), 6.82 (d,  $J = 8.4$  Hz, 2H), 7.38 (d,  $J = 8.4$  Hz, 2H);  $^{13}\text{C NMR}$  (100 MHz,  $\text{CDCl}_3$ )  $\delta$  193.9, 160.3, 147.6, 127.9, 127.5, 126.5, 122.4 (q,  $J_{\text{C-F}} = 286.6$  Hz), 113.1, 103.6 (q,  $J_{\text{C-F}} = 32.3$  Hz), 81.5, 78.9, 55.0, 37.7, 21.0; **IR** (KBr)  $\nu$  2982, 2922, 1694, 1611, 1513, 1463, 1388, 1304, 1251, 1173, 1094, 1048, 959, 834, 790  $\text{cm}^{-1}$ ;  $^{19}\text{F NMR}$  (376 MHz,  $\text{CDCl}_3$ )  $\delta$  -82.58 (s, 2.46F), -81.58 (s, 0.54F); **HRMS** (ESI) found:  $m/z$  351.0822  $[\text{M}+\text{Na}]^+$ ; calcd. for  $\text{C}_{16}\text{H}_{15}\text{F}_3\text{O}_4+\text{Na}$  351.0820.

**2-(3-methoxyphenyl)-7a-methyl-2-(trifluoromethyl)-3a,4-dihydrobenzo[d][1,3]dioxol-5(7aH)-one:**

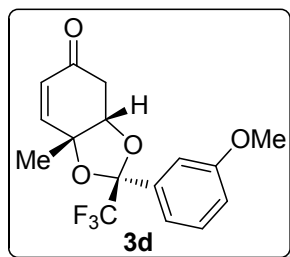

White solid; 84.6 mg, 86% yield; 80:20 dr; mp 50–52 °C;  $^1\text{H NMR}$  (400 MHz,  $\text{CDCl}_3$ )  $\delta$  1.59 (s, 3H), 2.60 (dd,  $J = 18.0$  Hz, 3.6 Hz, 1H), 3.05 (d,  $J = 17.6$  Hz, 1H), 3.75 (s, 3H), 4.65 (d,  $J = 2.4$  Hz, 1H), 5.61 (d,  $J = 10.4$  Hz, 1H), 6.27 (dd,  $J = 10.4$  Hz, 2.0 Hz, 1H), 6.86 (dd,  $J = 8.4$  Hz, 2.0 Hz, 1H), 6.99 (s, 1H), 7.05 (d,  $J = 8.0$  Hz, 1H), 7.20 (d,  $J = 8.0$  Hz, 1H);  $^{13}\text{C NMR}$  (100 MHz,  $\text{CDCl}_3$ )  $\delta$  193.8, 159.0, 147.4, 135.8, 128.9, 127.7, 122.4 (q,  $J_{\text{C-F}} = 287.1$  Hz), 118.9, 115.1, 112.1, 103.5 (q,  $J_{\text{C-F}} = 32.4$  Hz), 81.6, 79.0, 55.2, 37.7, 21.0; **IR** (KBr)  $\nu$  2935, 2838, 1697, 1603, 1587, 1489, 1456, 1388, 1316, 1270, 1241, 1127, 1046, 977, 898, 795, 730  $\text{cm}^{-1}$ ;  $^{19}\text{F NMR}$  (376 MHz,  $\text{CDCl}_3$ )  $\delta$  -82.31 (s, 2.40F), -81.23 (s, 0.60F); **HRMS** (ESI) found:  $m/z$  351.0821  $[\text{M}+\text{Na}]^+$ ; calcd. for  $\text{C}_{16}\text{H}_{15}\text{F}_3\text{O}_4+\text{Na}$  351.0820.

**2-(2-methoxyphenyl)-7a-methyl-2-(trifluoromethyl)-3a,4-dihydrobenzo[d][1,3]dioxol-5(7aH)-one:**

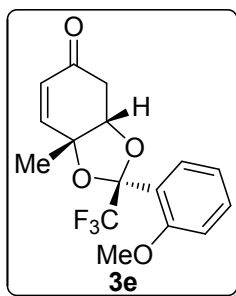

White solid; 76.8 mg, 78% yield; 90:10 dr; mp 114–116 °C;  $^1\text{H NMR}$  (400 MHz,  $\text{CDCl}_3$ )  $\delta$  1.61 (s, 3H), 2.60 (dd,  $J = 17.6$  Hz, 3.2 Hz, 1H), 3.08 (d,  $J = 17.6$  Hz, 1H), 3.78 (s, 3H), 4.63 (s, 1H), 5.62 (d,  $J = 10.4$  Hz, 1H), 6.32 (d,  $J = 10.0$  Hz, 1H), 6.89 (t,  $J = 8.0$  Hz, 2H), 7.31 (t,  $J = 8.0$  Hz, 1H), 7.48 (d,  $J = 7.6$  Hz, 1H);  $^{13}\text{C NMR}$  (100 MHz,  $\text{CDCl}_3$ )  $\delta$  194.0, 158.0, 147.5, 131.2, 129.1, 127.6, 122.7 (q,  $J_{\text{C-F}} = 287.6$  Hz), 122.5, 119.9, 112.8, 104.3 (q,  $J_{\text{C-F}} = 34.1$  Hz), 81.0, 78.5, 56.2, 37.7, 21.1; **IR** (KBr)  $\nu$  2922, 2841, 1693, 1601, 1585, 1489, 1456, 1436, 1388, 1285, 1253, 1173, 1119, 1081,

956, 937, 789, 759, 713  $\text{cm}^{-1}$ ;  $^{19}\text{F}$  NMR (376 MHz,  $\text{CDCl}_3$ )  $\delta$  -81.69 (s, 2.70F), -80.51 (s, 0.30F); HRMS (ESI) found:  $m/z$  351.0818  $[\text{M}+\text{Na}]^+$ ; calcd. for  $\text{C}_{16}\text{H}_{15}\text{F}_3\text{O}_4+\text{Na}$  351.0820.

**2-(4-fluorophenyl)-7a-methyl-2-(trifluoromethyl)-3a,4-dihydrobenzo[d][1,3]dioxol-5(7aH)-one:**

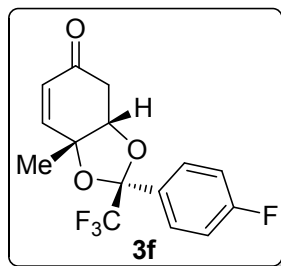

White solid; 90.1 mg, 95% yield; 82:18 dr; mp 63–65 °C;  $^1\text{H}$  NMR (400 MHz,  $\text{CDCl}_3$ )  $\delta$  1.65 (s, 3H), 2.66 (dd,  $J = 18.0$  Hz, 3.2 Hz, 1H), 3.03–3.13 (m, 1H), 4.72 (d,  $J = 2.4$  Hz, 1H), 5.65 (dd,  $J = 10.4$  Hz, 0.8 Hz, 1H), 6.30 (dd,  $J = 10.4$  Hz, 2.4 Hz, 1H), 7.10–7.17 (m, 2H), 7.49–7.53 (m, 2H);  $^{13}\text{C}$  NMR (100 MHz,  $\text{CDCl}_3$ )  $\delta$  193.7, 162.6 (d,  $J_{\text{C-F}} = 245.5$  Hz), 147.3, 139.9, 128.8 (d,  $J_{\text{C-F}} = 8.0$  Hz), 128.3 (d,  $J_{\text{C-F}} = 27.8$  Hz), 127.8, 125.3 (d,  $J_{\text{C-F}} = 37.3$  Hz), 122.4 (q,  $J_{\text{C-F}} = 286.8$  Hz), 115.6 (d,  $J_{\text{C-F}} = 21.4$  Hz), 103.6 (q,  $J_{\text{C-F}} = 32.1$  Hz), 81.7, 79.1, 37.8, 21.1; IR (KBr)  $\nu$  3043, 2964, 2931, 1697, 1607, 1514, 1496, 1481, 1456, 1313, 1239, 1261, 1126, 1048, 968, 839, 793, 726  $\text{cm}^{-1}$ ;  $^{19}\text{F}$  NMR (376 MHz,  $\text{CDCl}_3$ )  $\delta$  -82.25 (s, 2.46F), -81.19 (s, 0.54F), -115.26 (s, 0.82F), -115.00 (s, 0.18F); HRMS (ESI) found:  $m/z$  339.0622  $[\text{M}+\text{Na}]^+$ ; calcd. for  $\text{C}_{15}\text{H}_{12}\text{F}_4\text{O}_3+\text{Na}$  339.0620.

**2-(4-chlorophenyl)-7a-methyl-2-(trifluoromethyl)-3a,4-dihydrobenzo[d][1,3]dioxol-5(7aH)-one:**

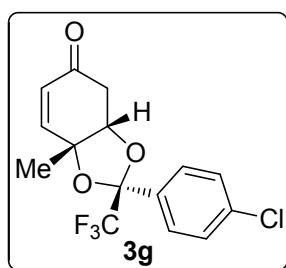

Colorless oily liquid; 92.8 mg, 93% yield; 82:18 dr;  $^1\text{H NMR}$  (400 MHz,  $\text{CDCl}_3$ )  $\delta$  1.59 (s, 3H), 2.63 (dd,  $J = 17.6$  Hz, 2.0 Hz, 1H), 3.03 (d,  $J = 17.6$  Hz, 1H), 4.66 (s, 1H), 5.61 (d,  $J = 10.4$  Hz, 1H), 6.24 (dd,  $J = 10.0$  Hz, 1H), 7.29 (d,  $J = 8.4$  Hz, 2H), 7.42 (d,  $J = 8.0$  Hz, 2H);  $^{13}\text{C NMR}$  (100 MHz,  $\text{CDCl}_3$ )  $\delta$  193.4, 147.0, 135.6, 133.0, 128.1, 128.0, 127.7, 122.1 (q,  $J_{\text{C-F}} = 286.7$  Hz), 113.1, 103.2 (q,  $J_{\text{C-F}} = 32.7$  Hz), 81.7, 79.2, 37.6, 20.9; **IR** (KBr)  $\nu$  2988, 2937, 1694, 1599, 1491, 1402, 1307, 1247, 1179, 1099, 1045, 1018, 959, 831, 736  $\text{cm}^{-1}$ ;  $^{19}\text{F NMR}$  (376 MHz,  $\text{CDCl}_3$ )  $\delta$  -82.51 (s, 2.46F), -81.39 (s, 0.54F); **HRMS** (ESI) found:  $m/z$  355.0327  $[\text{M}+\text{Na}]^+$ ; calcd. for  $\text{C}_{15}\text{H}_{12}\text{ClF}_3\text{O}_3+\text{Na}$  355.0325.

**2-(4-bromophenyl)-7a-methyl-2-(trifluoromethyl)-3a,4-dihydrobenzo[d][1,3]dioxol-5(7aH)-one:**

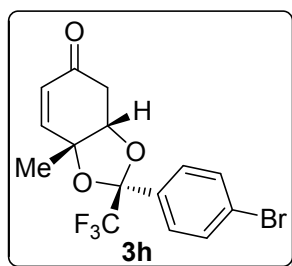

Colorless oily liquid; 102.9 mg, 91% yield; 80:20 dr;  $^1\text{H NMR}$  (400 MHz,  $\text{CDCl}_3$ )  $\delta$  1.60 (s, 3H), 2.62 (dd,  $J = 18.0$  Hz, 3.6 Hz, 1H), 3.04 (dd,  $J = 18.0$  Hz, 1.6 Hz, 1H), 4.66 (d,  $J = 2.4$  Hz, 1H), 5.62 (d,  $J = 10.4$  Hz, 1H), 6.24 (dd,  $J = 10.4$  Hz, 1.6 Hz, 1H), 7.34 (d,  $J = 8.4$  Hz, 2H), 7.45 (d,  $J = 8.8$  Hz, 2H);  $^{13}\text{C NMR}$  (100 MHz,  $\text{CDCl}_3$ )  $\delta$  193.5, 147.1, 133.5, 131.1, 128.3, 127.8, 124.1, 122.1 (q,  $J_{\text{C-F}} = 286.6$  Hz), 103.2 (q,  $J_{\text{C-F}} = 32.6$  Hz), 81.7, 79.2, 37.7, 21.0; **IR** (KBr)  $\nu$  2964, 2930, 1703, 1697, 1592, 1488, 1456, 1397, 1313, 1260, 1176, 1093, 1013, 961, 941, 826, 790, 736  $\text{cm}^{-1}$ ;  $^{19}\text{F NMR}$  (376 MHz,  $\text{CDCl}_3$ )  $\delta$  -82.47 (s, 2.40F), -81.35 (s, 0.60F); **HRMS** (ESI) found:  $m/z$  398.9820  $[\text{M}+\text{Na}]^+$ ; calcd. for  $\text{C}_{15}\text{H}_{12}\text{BrF}_3\text{O}_3+\text{Na}$  398.9820.

**7a-methyl-2-(trifluoromethyl)-2-(3,4,5-trifluorophenyl)-3a,4-dihydrobenzo[d][1,3]dioxol-5(7aH)-one:**



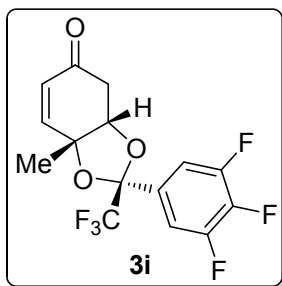

White solid; 96.1 mg, 91% yield; 84:16 dr; mp 88–90 °C; **<sup>1</sup>H NMR** (400 MHz, CDCl<sub>3</sub>) δ 1.67 (s, 3H), 2.69 (dd, *J* = 18.0 Hz, 3.2 Hz, 1H), 3.10 (dd, *J* = 18.0 Hz, 1.6 Hz, 1H), 4.73 (d, *J* = 2.0 Hz, 1H), 5.74 (d, *J* = 10.4 Hz, 1H), 6.33 (dd, *J* = 10.4 Hz, 2.0 Hz, 1H), 7.17 (t, *J* = 7.2 Hz, 2H); **<sup>13</sup>C NMR** (100 MHz, CDCl<sub>3</sub>) δ 193.1, 150.7 (dddd, *J*<sub>C-F</sub> = 250.0 Hz, 3.5 Hz), 146.6, 140.6 (dt, *J*<sub>C-F</sub> = 253.4 Hz, 15.1 Hz), 130.9 (q, *J*<sub>C-F</sub> = 4.5 Hz), 128.1, 121.9 (m), 111.5 (dd, *J*<sub>C-F</sub> = 23.1 Hz, 6.5 Hz), 102.4 (q, *J*<sub>C-F</sub> = 33.1 Hz), 82.1, 79.7, 37.6, 21.0; **IR** (KBr) ν 3088, 2983, 2935, 1697, 1626, 1601, 1532, 1443, 1358, 1316, 1241, 1177, 1128, 1088, 1041, 1012, 851, 805, 742 cm<sup>-1</sup>; **<sup>19</sup>F NMR** (376 MHz, CDCl<sub>3</sub>) δ -82.50 (s, 2.52F), -81.29 (s, 0.48F), -133.00 (d, *J* = 20.3 Hz, 1.68F), -132.70 (d, *J* = 20.3 Hz, 0.32F), -157.93 (t, *J* = 20.3 Hz, 0.84F), -157.48 (t, *J* = 20.3 Hz, 0.16F); **HRMS** (ESI) found: *m/z* 375.0431 [M+Na]<sup>+</sup>; calcd. for C<sub>15</sub>H<sub>10</sub>F<sub>6</sub>O<sub>3</sub>+Na 375.0432.

**7a-methyl-2-(naphthalen-1-yl)-2-(trifluoromethyl)-3a,4-dihydrobenzo[d][1,3]dioxol-5(7aH)-one:**

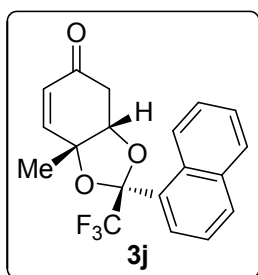

White solid; 83.6 mg, 80% yield; 78:22 dr; mp 45–47 °C; **<sup>1</sup>H NMR** (400 MHz, CDCl<sub>3</sub>) δ 1.62 (s, 3H), 2.62 (d, *J* = 18.0 Hz, 1H), 3.11 (d, *J* = 18.0 Hz, 1H), 4.75 (s, 1H), 5.47 (d, *J* = 10.4 Hz, 1H), 6.21 (d, *J* = 9.6 Hz, 1H), 7.42 (t, *J* = 8.0 Hz, 1H), 7.46–7.52 (m, 2H), 7.81 (d, *J* = 8.0 Hz, 1H), 7.85 (d, *J* = 8.0 Hz, 2H), 8.62 (d, *J* = 5.6 Hz, 1H); **<sup>13</sup>C NMR** (100 MHz, CDCl<sub>3</sub>) δ 193.4, 147.0, 133.8, 130.8, 130.4, 130.2,

128.3, 127.5, 126.9, 126.5, 126.0, 125.4, 124.1, 122.8 (q,  $J_{C-F} = 287.9$  Hz), 105.3 (q,  $J_{C-F} = 33.1$  Hz), 81.2, 78.9, 37.5, 20.7; **IR** (KBr)  $\nu$  3052, 2980, 2932, 1694, 1510, 1388, 1307, 1240, 1176, 1121, 1082, 1050, 1016, 941, 803, 776  $\text{cm}^{-1}$ ;  **$^{19}\text{F}$  NMR** (376 MHz,  $\text{CDCl}_3$ )  $\delta$  -81.01 (s, 2.34F), -79.93 (s, 0.66F); **HRMS** (ESI) found:  $m/z$  371.0868  $[\text{M}+\text{Na}]^+$ ; calcd. for  $\text{C}_{19}\text{H}_{15}\text{F}_3\text{O}_3+\text{Na}$  371.0871.

**7a-methyl-2-(naphthalen-2-yl)-2-(trifluoromethyl)-3a,4-dihydrobenzo[d][1,3]dioxol-5(7aH)-one:**

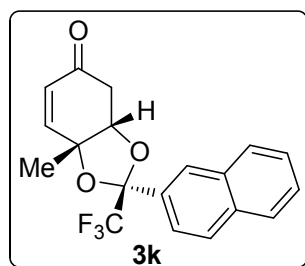

White solid; 86.7 mg, 83% yield; 76:24 dr; mp 105–107 °C;  **$^1\text{H}$  NMR** (400 MHz,  $\text{CDCl}_3$ )  $\delta$  1.64 (s, 3H), 2.64 (dd,  $J = 18.0$  Hz, 2.8 Hz, 1H), 3.13 (d,  $J = 18.8$  Hz, 1H), 4.73 (s, 1H), 5.55 (d,  $J = 10.4$  Hz, 1H), 6.28 (d,  $J = 10.0$  Hz, 1H), 7.52 (t,  $J = 4.0$  Hz, 2H), 7.62 (d,  $J = 8.4$  Hz, 1H), 7.81–7.89 (m, 3H), 8.04 (s, 1H);  **$^{13}\text{C}$  NMR** (100 MHz,  $\text{CDCl}_3$ )  $\delta$  193.6, 147.3, 133.5, 132.2, 131.8, 128.5, 127.7, 127.6, 127.5, 126.9, 126.5, 126.3, 123.6, 122.5 (q,  $J_{C-F} = 286.7$  Hz), 103.7 (q,  $J_{C-F} = 32.6$  Hz), 81.6, 79.1, 37.6, 20.9; **IR** (KBr)  $\nu$  3060, 2963, 2928, 1694, 1508, 1455, 1388, 1313, 1275, 1240, 1179, 1127, 1089, 1048, 935, 819, 750  $\text{cm}^{-1}$ ;  **$^{19}\text{F}$  NMR** (376 MHz,  $\text{CDCl}_3$ )  $\delta$  -82.01 (s, 2.28F), -80.92 (s, 0.72F); **HRMS** (ESI) found:  $m/z$  371.0873  $[\text{M}+\text{Na}]^+$ ; calcd. for  $\text{C}_{19}\text{H}_{15}\text{F}_3\text{O}_3+\text{Na}$  371.0871.

**7a-methyl-2-(thiophen-2-yl)-2-(trifluoromethyl)-3a,4-dihydrobenzo[d][1,3]dioxol-5(7aH)-one:**

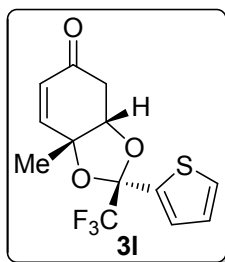

White solid; 65.7 mg, 72% yield; 75:25 dr; mp 71–73 °C; **<sup>1</sup>H NMR** (400 MHz, CDCl<sub>3</sub>) δ 1.62 (s, 3H), 2.66 (dd, *J* = 18.0 Hz, 3.2 Hz, 1H), 3.07 (d, *J* = 18.0 Hz, 1H), 4.66 (s, 1H), 5.76 (d, *J* = 10.4 Hz, 1H), 6.41 (dd, *J* = 10.4 Hz, 2.0 Hz, 1H), 6.97 (t, *J* = 4.0 Hz, 1H), 7.19 (d, *J* = 2.8 Hz, 1H), 7.32 (d, *J* = 5.2 Hz, 1H); **<sup>13</sup>C NMR** (100 MHz, CDCl<sub>3</sub>) δ 193.5, 147.1, 136.8, 127.8, 127.5, 127.2, 126.9, 122.0 (q, *J*<sub>C-F</sub> = 286.4 Hz), 102.7 (q, *J*<sub>C-F</sub> = 33.5 Hz), 81.9, 79.6, 37.6, 21.1; **IR** (KBr) ν 2985, 2931, 1694, 1589, 1490, 1328, 1241, 1179, 1088, 1075, 923, 798, 721 cm<sup>-1</sup>; **<sup>19</sup>F NMR** (376 MHz, CDCl<sub>3</sub>) δ -82.63 (s, 2.25F), -81.59 (s, 0.75F); **HRMS** (ESI) found: *m/z* 327.0279 [M+Na]<sup>+</sup>; calcd. for C<sub>13</sub>H<sub>11</sub>F<sub>3</sub>O<sub>3</sub>S+Na 327.0279.

**2,7a-diphenyl-2-(trifluoromethyl)-3a,4-dihydrobenzo[d][1,3]dioxol-5(7aH)-one:**

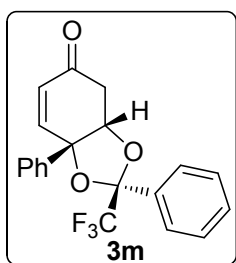

White solid; 91.9 mg, 85% yield; 94:6 dr; mp 133–135 °C; **<sup>1</sup>H NMR** (400 MHz, CDCl<sub>3</sub>) δ 2.67 (dd, *J* = 18.0 Hz, 2.8 Hz, 1H), 3.06 (d, *J* = 18.0 Hz, 1H), 4.80 (s, 1H), 5.89 (d, *J* = 10.4 Hz, 1H), 6.41 (dd, *J* = 10.4 Hz, 2.0 Hz, 1H), 7.36–7.40 (m, 3H), 7.44–7.50 (m, 3H), 7.57–7.60 (m, 4H); **<sup>13</sup>C NMR** (100 MHz, CDCl<sub>3</sub>) δ 194.0, 145.1, 135.1, 134.3, 129.6, 129.3, 129.2, 129.1, 127.9, 126.6, 125.4, 122.6 (q, *J*<sub>C-F</sub> = 287.1 Hz), 104.2 (q, *J*<sub>C-F</sub> = 32.3 Hz), 83.3, 82.6, 37.0; **IR** (KBr) ν 3062, 2931, 1694, 1494, 1450, 1385, 1313, 1273, 1176, 1095, 1063, 1031, 955, 762, 725, 697 cm<sup>-1</sup>; **<sup>19</sup>F NMR** (376 MHz, CDCl<sub>3</sub>) δ -81.40 (s, 2.82F), -81.08 (s, 0.18F); **HRMS** (ESI) found: *m/z* 383.0874 [M+Na]<sup>+</sup>; calcd. for C<sub>20</sub>H<sub>15</sub>F<sub>3</sub>O<sub>3</sub>+Na 383.0871.

**2-(4-methoxyphenyl)-7a-phenyl-2-(trifluoromethyl)-3a,4-dihydrobenzo[d][1,3]dioxol-5(7aH)-one:**

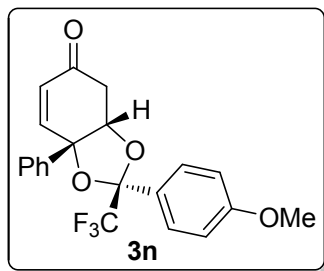

White solid; 92.5 mg, 79% yield; 86:14 dr; mp 131–133 °C;  $^1\text{H NMR}$  (400 MHz,  $\text{CDCl}_3$ )  $\delta$  2.65 (dd,  $J = 18.0$  Hz, 3.2 Hz, 1H), 3.05 (dd,  $J = 18.0$  Hz, 2.0 Hz, 1H), 3.81 (s, 3H), 4.77 (d,  $J = 2.4$  Hz, 1H), 5.91 (d,  $J = 10.4$  Hz, 1H), 6.40 (dd,  $J = 10.4$  Hz, 2.4 Hz, 1H), 6.87 (d,  $J = 8.8$  Hz, 2H), 7.41–7.48 (m, 5H), 7.53–7.56 (m, 2H);  $^{13}\text{C NMR}$  (100 MHz,  $\text{CDCl}_3$ )  $\delta$  194.1, 160.5, 145.3, 135.2, 129.3, 129.2, 129.1, 128.0, 126.5, 125.4, 122.7 (q,  $J_{\text{C-F}} = 286.7$  Hz), 113.3, 104.3 (q,  $J_{\text{C-F}} = 32.7$  Hz), 83.3, 82.6, 55.1, 37.1; **IR** (KBr)  $\nu$  3062, 2963, 2936, 2840, 1697, 1611, 1514, 1449, 1385, 1304, 1252, 1173, 1098, 1014, 956, 834, 760, 699  $\text{cm}^{-1}$ ;  $^{19}\text{F NMR}$  (376 MHz,  $\text{CDCl}_3$ )  $\delta$  -81.60 (s, 2.58F), -81.35 (s, 0.42F); **HRMS** (ESI) found:  $m/z$  413.0975  $[\text{M}+\text{Na}]^+$ ; calcd. for  $\text{C}_{21}\text{H}_{17}\text{F}_3\text{O}_4+\text{Na}$  413.0977.

**2-(4-chlorophenyl)-7a-phenyl-2-(trifluoromethyl)-3a,4-dihydrobenzo[d][1,3]dioxol-5(7aH)-one:**

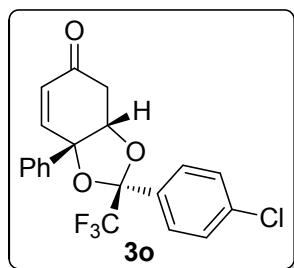

White solid; 105.3 mg, 89% yield; 97:3 dr; mp 140–142 °C;  $^1\text{H NMR}$  (400 MHz,  $\text{CDCl}_3$ )  $\delta$  2.66 (dd,  $J = 18.0$  Hz, 3.2 Hz, 1H), 3.05 (dd,  $J = 18.0$  Hz, 2.0 Hz, 1H), 4.79 (d,  $J = 2.4$  Hz, 1H), 5.92 (d,  $J = 10.4$  Hz, 1H), 6.39 (dd,  $J = 10.4$  Hz, 2.4 Hz, 1H), 7.34 (d,  $J = 8.8$  Hz, 2H), 7.43–7.55 (m, 7H);  $^{13}\text{C NMR}$  (100 MHz,  $\text{CDCl}_3$ )  $\delta$  193.7, 144.8, 135.9, 134.9, 133.0, 129.5, 129.4, 129.1, 128.3, 128.1, 125.4, 122.4 (q,  $J_{\text{C-F}} = 286.8$

Hz), 103.9 (q,  $J_{C-F} = 32.8$  Hz), 83.5, 82.8, 37.0; **IR** (KBr)  $\nu$  3063, 2933, 1694, 1600, 1493, 1449, 1403, 1385, 1313, 1272, 1219, 1177, 1016, 1001, 958, 941, 830, 792, 739, 698  $\text{cm}^{-1}$ ;  **$^{19}\text{F}$  NMR** (376 MHz,  $\text{CDCl}_3$ )  $\delta$  -81.51 (s, 2.91F), -81.12 (s, 0.09F); **HRMS** (ESI) found:  $m/z$  417.0484  $[\text{M}+\text{Na}]^+$ ; calcd. for  $\text{C}_{20}\text{H}_{14}\text{ClF}_3\text{O}_3+\text{Na}$  417.0481.

**7a-ethyl-2-phenyl-2-(trifluoromethyl)-3a,4-dihydrobenzo[d][1,3]dioxol-5(7aH)-one:**

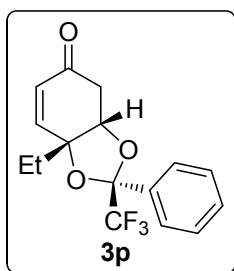

White solid; 82.5 mg, 88% yield; 80:20 dr; mp 44–46 °C;  **$^1\text{H}$  NMR** (400 MHz,  $\text{CDCl}_3$ )  $\delta$  1.08 (t,  $J = 7.6$  Hz, 3H), 1.88–2.02 (m, 2H), 2.60 (dd,  $J = 18.0$  Hz, 3.6 Hz, 1H), 3.06 (dd,  $J = 18.0$  Hz, 2.4 Hz, 1H), 4.72 (d,  $J = 2.4$  Hz, 1H), 5.65 (d,  $J = 10.4$  Hz, 1H), 6.26 (dd,  $J = 10.4$  Hz, 2.4 Hz, 1H), 7.28–7.36 (m, 3H), 7.48 (d,  $J = 6.8$  Hz, 2H);  **$^{13}\text{C}$  NMR** (100 MHz,  $\text{CDCl}_3$ )  $\delta$  194.0, 146.7, 134.6, 129.4, 128.5, 127.7, 126.5, 122.4 (q,  $J_{C-F} = 286.9$  Hz), 103.4 (q,  $J_{C-F} = 32.5$  Hz), 81.3, 79.9, 38.2, 28.0, 7.6; **IR** (KBr)  $\nu$  2976, 2943, 1693, 1451, 1463, 1386, 1266, 1176, 1095, 1053, 1031, 954, 919, 763, 722, 697, 664  $\text{cm}^{-1}$ ;  **$^{19}\text{F}$  NMR** (376 MHz,  $\text{CDCl}_3$ )  $\delta$  -82.15 (s, 2.40F), -81.40 (s, 0.60F); **HRMS** (ESI) found:  $m/z$  335.0869  $[\text{M}+\text{Na}]^+$ ; calcd. for  $\text{C}_{16}\text{H}_{15}\text{F}_3\text{O}_3+\text{Na}$  335.0871.

**7a-isopropyl-2-phenyl-2-(trifluoromethyl)-3a,4-dihydrobenzo[d][1,3]dioxol-5(7aH)-one:**

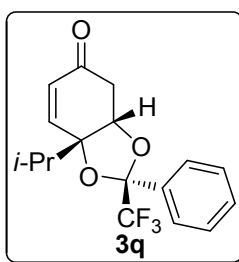

White solid; 85.2 mg, 87% yield; 75:25 dr; mp 43–45 °C;  $^1\text{H NMR}$  (400 MHz,  $\text{CDCl}_3$ )  $\delta$  1.05 (d,  $J = 6.8$  Hz, 3H), 1.11 (d,  $J = 6.8$  Hz, 3H), 2.17–2.28 (m, 1H), 2.61 (dd,  $J = 18.4$  Hz, 3.6 Hz, 1H), 3.04 (d,  $J = 17.6$  Hz, 1H), 4.75 (dd,  $J = 2.0$  Hz, 1H), 5.70 (d,  $J = 10.4$  Hz, 1H), 6.27 (dd,  $J = 10.4$  Hz, 2.0 Hz, 1H), 7.26–7.34 (m, 3H), 7.47 (d,  $J = 7.6$  Hz, 2H);  $^{13}\text{C NMR}$  (100 MHz,  $\text{CDCl}_3$ )  $\delta$  194.1, 145.4, 134.8, 129.6, 129.3, 127.7, 126.4, 122.3 (q,  $J_{\text{C-F}} = 286.9$  Hz), 103.1 (q,  $J_{\text{C-F}} = 32.3$  Hz), 83.3, 79.0, 39.0, 33.6, 17.4, 16.5; **IR** (KBr)  $\nu$  2970, 2876, 1693, 1472, 1451, 1390, 1311, 1272, 1245, 1104, 1063, 1030, 955, 763, 723, 697, 664  $\text{cm}^{-1}$ ;  $^{19}\text{F NMR}$  (376 MHz,  $\text{CDCl}_3$ )  $\delta$  –82.04 (s, 2.25F), –81.49 (s, 0.75F); **HRMS** (ESI) found:  $m/z$  349.1028  $[\text{M}+\text{Na}]^+$ ; calcd. for  $\text{C}_{17}\text{H}_{17}\text{F}_3\text{O}_3+\text{Na}$  349.1027.

**6,7a-dimethyl-2-phenyl-2-(trifluoromethyl)-3a,4-dihydrobenzo[d][1,3]dioxol-5(7aH)-one:**

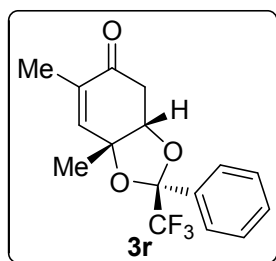

White solid; 83.4 mg, 89% yield; 80:20 dr; mp 76–78 °C;  $^1\text{H NMR}$  (400 MHz,  $\text{CDCl}_3$ )  $\delta$  1.33 (s, 3H), 1.58 (s, 3H), 2.59 (dd,  $J = 17.6$  Hz, 3.2 Hz, 1H), 3.08 (d,  $J = 17.6$  Hz, 1H), 4.61 (s, 1H), 5.96 (s, 1H), 7.30–7.34 (m, 3H), 7.44–7.46 (m, 2H);  $^{13}\text{C NMR}$  (100 MHz,  $\text{CDCl}_3$ )  $\delta$  194.3, 142.6, 134.9, 134.7, 129.3, 127.7, 126.5, 122.4 (q,  $J_{\text{C-F}} = 286.0$  Hz), 103.5 (q,  $J_{\text{C-F}} = 32.1$  Hz), 81.8, 79.7, 38.0, 21.2, 14.9; **IR** (KBr)  $\nu$  2980, 2926, 1688, 1450, 1377, 1363, 1319, 1259, 1177, 1096, 1059, 957, 919, 721, 697, 664  $\text{cm}^{-1}$ ;  $^{19}\text{F NMR}$  (376 MHz,  $\text{CDCl}_3$ )  $\delta$  –82.46 (s, 2.40F), –81.42 (s, 0.60F); **HRMS** (ESI) found:  $m/z$  335.0873  $[\text{M}+\text{Na}]^+$ ; calcd. for  $\text{C}_{16}\text{H}_{15}\text{F}_3\text{O}_3+\text{Na}$  335.0871.

**4,6,7a-trimethyl-2-phenyl-2-(trifluoromethyl)-3a,4-dihydrobenzo[d][1,3]dioxol-5(7aH)-one:**

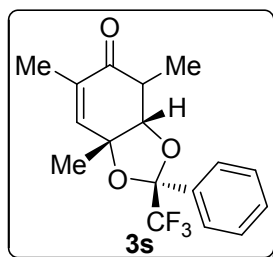

White solid; 79.3 mg, 81% yield; >99:1 dr (recrystallization); mp 81–82 °C;  $^1\text{H NMR}$  (400 MHz,  $\text{CDCl}_3$ )  $\delta$  1.31 (s, 3H), 1.43 (d,  $J = 6.8$  Hz, 3H), 1.60 (s, 3H), 2.61 (dq,  $J = 6.8$  Hz, 2.4 Hz, 1H), 4.49 (s, 1H), 5.88 (s, 1H), 7.28–7.31 (m, 3H), 7.41–7.43 (m, 2H);  $^{13}\text{C NMR}$  (100 MHz,  $\text{CDCl}_3$ )  $\delta$  197.2, 141.2, 135.1, 134.7, 129.2, 127.7, 126.5, 122.4 (q,  $J_{\text{C-F}} = 286.2$  Hz), 103.6 (q,  $J_{\text{C-F}} = 32.3$  Hz), 86.8, 80.0, 41.8, 21.1, 15.0, 11.9; **IR** (KBr)  $\nu$  2990, 2906, 1685, 1452, 1385, 1312, 1175, 1161, 1100, 1043, 965, 719, 698, 663  $\text{cm}^{-1}$ ;  $^{19}\text{F NMR}$  (376 MHz,  $\text{CDCl}_3$ )  $\delta$  -82.50 (s, 3F); **HRMS** (ESI) found:  $m/z$  349.1029  $[\text{M}+\text{Na}]^+$ ; calcd. for  $\text{C}_{17}\text{H}_{17}\text{F}_3\text{O}_3+\text{Na}$  349.1027.

**2-benzyl-7a-methyl-2-(trifluoromethyl)-3a,4-dihydrobenzo[d][1,3]dioxol-5(7aH)-one:**

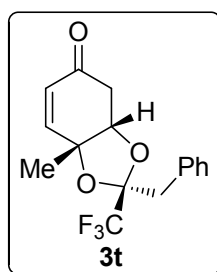

White solid; 74.9 mg, 80% yield; 85:15 dr; mp 58–60 °C;  $^1\text{H NMR}$  (400 MHz,  $\text{CDCl}_3$ )  $\delta$  1.44 (s, 3H), 2.42 (dd,  $J = 14.8$  Hz, 3.2 Hz, 1H), 2.88 (d,  $J = 18.0$  Hz, 1H), 3.03 (dd,  $J = 28.0$  Hz, 13.6 Hz, 2H), 4.54 (s, 1H), 4.99 (d,  $J = 10.0$  Hz, 1H), 5.78 (d,  $J = 10.0$  Hz, 1H), 7.04–7.17 (m, 2H), 7.18–7.27 (m, 3H);  $^{13}\text{C NMR}$  (100 MHz,  $\text{CDCl}_3$ )  $\delta$  193.4, 146.0, 131.9, 131.8, 128.0, 127.3, 124.9, 123.3 (q,  $J_{\text{C-F}} = 290.0$  Hz), 104.5 (q,  $J_{\text{C-F}} = 30.3$  Hz), 81.0, 78.4, 37.5, 37.0, 22.2; **IR** (KBr)  $\nu$  3035, 2978, 2935, 1693, 1498, 1456, 1389, 1243, 1158, 1044, 997, 785, 726, 699  $\text{cm}^{-1}$ ;  $^{19}\text{F NMR}$  (376 MHz,  $\text{CDCl}_3$ )  $\delta$  -81.68 (s, 2.55F), -81.08 (s, 0.45F); **HRMS** (ESI) found:  $m/z$  335.0873  $[\text{M}+\text{Na}]^+$ ; calcd. for  $\text{C}_{16}\text{H}_{15}\text{F}_3\text{O}_3+\text{Na}$  335.0871.

**2-ethyl-7a-methyl-2-(trifluoromethyl)-3a,4-dihydrobenzo[d][1,3]dioxol-5(7aH)-one:**

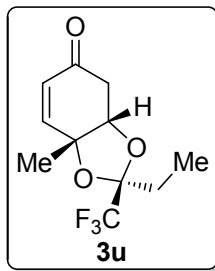

Colorless liquid; 51.1 mg, 68% yield; 80:20 dr; **<sup>1</sup>H NMR** (400 MHz, CDCl<sub>3</sub>) δ 0.85 (t, *J* = 6.4 Hz, 3H), 1.55 (s, 3H), 1.78 (d, *J* = 6.8 Hz, 2H), 2.61 (dd, *J* = 16.0 Hz, 1.6 Hz, 1H), 2.97 (d, *J* = 18.0 Hz, 1H), 4.60 (s, 1H), 5.98 (d, *J* = 10.0 Hz, 1H), 6.55 (d, *J* = 10.4 Hz, 1H); **<sup>13</sup>C NMR** (100 MHz, CDCl<sub>3</sub>) δ 193.9, 148.6, 127.2, 123.3 (q, *J*<sub>C-F</sub> = 289.3 Hz), 105.7 (q, *J*<sub>C-F</sub> = 30.4 Hz), 80.8, 78.3, 37.8, 25.7, 21.9, 6.7; **IR** (KBr) ν 2984, 2944, 1695, 1466, 1389, 1320, 1256, 1169, 1122, 1088, 1057, 1027, 962, 794, 727 cm<sup>-1</sup>; **<sup>19</sup>F NMR** (376 MHz, CDCl<sub>3</sub>) δ -81.19 (s, 2.40F), -80.49 (s, 0.60F); **HRMS** (ESI) found: *m/z* 273.0717 [M+Na]<sup>+</sup>; calcd. for C<sub>11</sub>H<sub>11</sub>F<sub>3</sub>O<sub>3</sub>+Na 273.0714.

**References:**

- [1] a) Creary, X. *J. Org. Chem.* **1987**, *52*, 5026. b) Chong, J. M.; Mar, E. K. *J. Org. Chem.* **1991**, *56*, 893. c) Prakash, G. K. S.; Panja, C.; Vaghoo, H.; Surampudi, V.; Kultyshev, R.; Mandal, M.; Rasul, G.; Mathew, T.; Olah, G. A. *J. Org. Chem.* **2006**, *71*, 6806. d) Cheng, H.; Pei, Y.; Leng, F.; Li, J.; Liang, A.; Zou, D.; Wu, Y.; Wu, Y. *Tetrahedron Lett.* **2013**, *54*, 4483.
- [2] a) Novak, M.; Glover, S. A. *J. Am. Chem. Soc.* **2004**, *126*, 7748. b) Carreño, M. C.; González-López, M.; Urbano, A. *Angew. Chem., Int. Ed.* **2006**, *45*, 2737. c) Tello-Aburto, R.; Kalstabakken, K. A.; Volp, K. A.; Harned, A. M. *Org. Biomol. Chem.* **2011**, *9*, 7849.



## Copies of HPLC spectra of racemic /chiral product 3a:

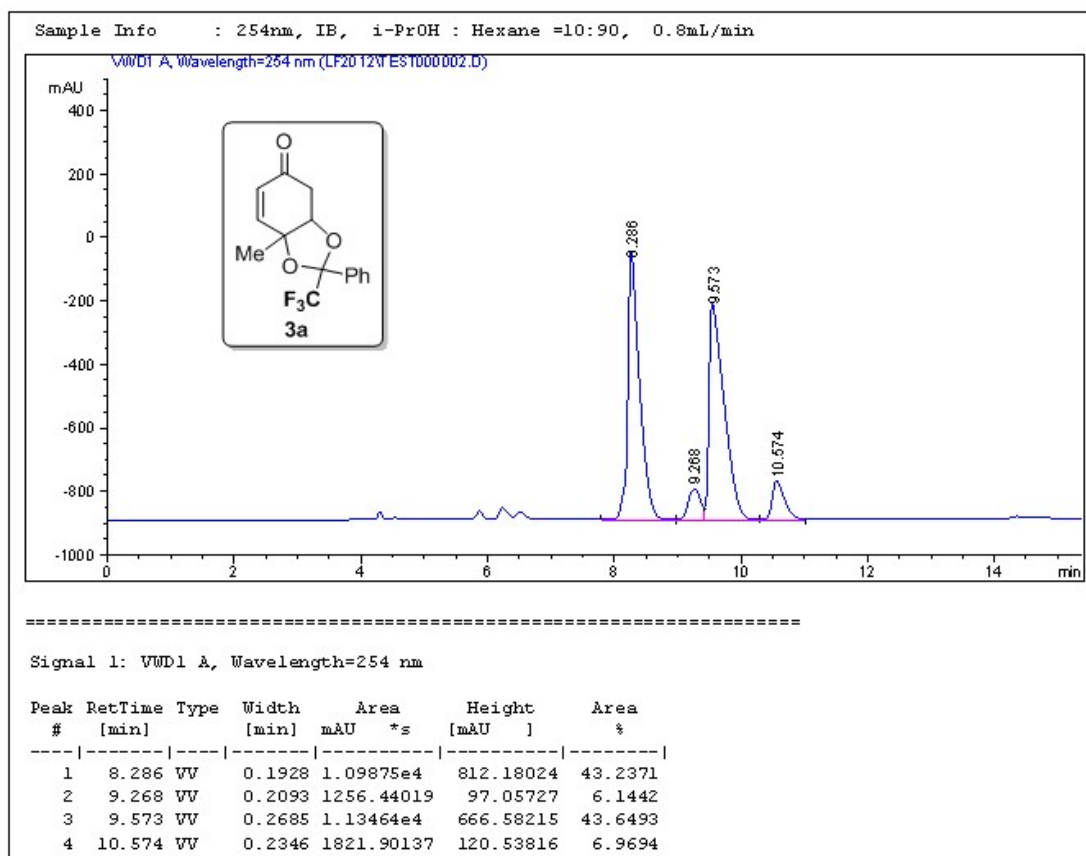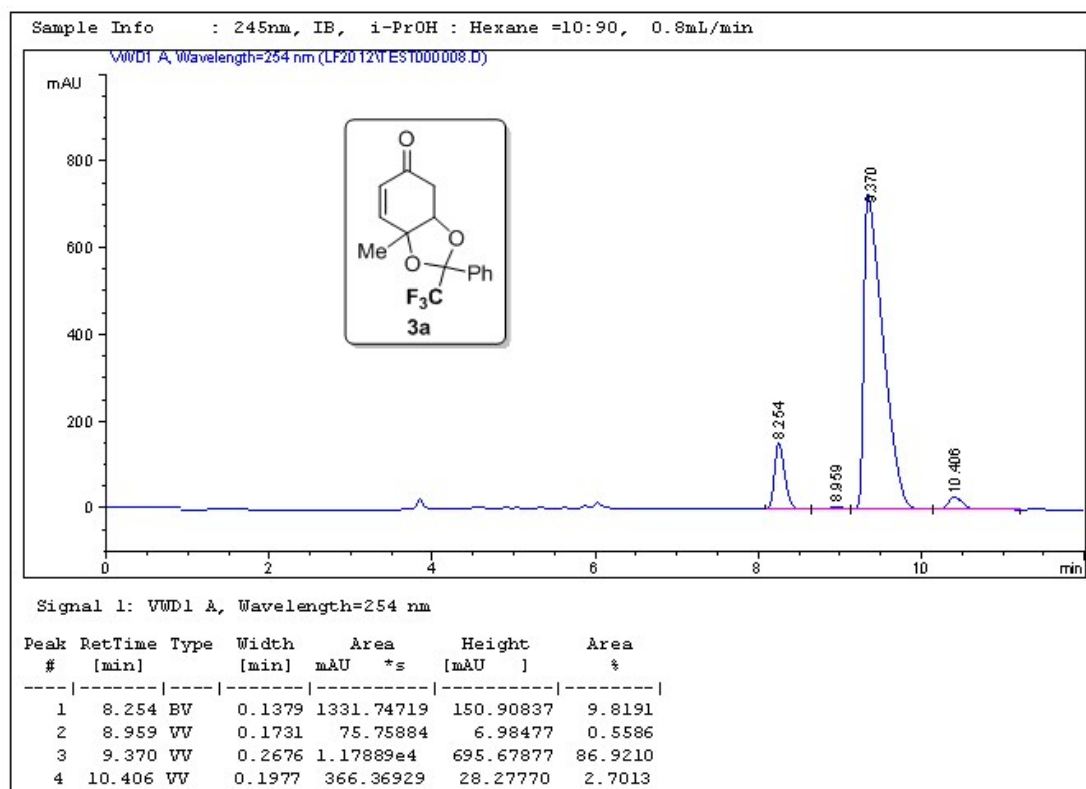

Copies of NMR spectra of the products:

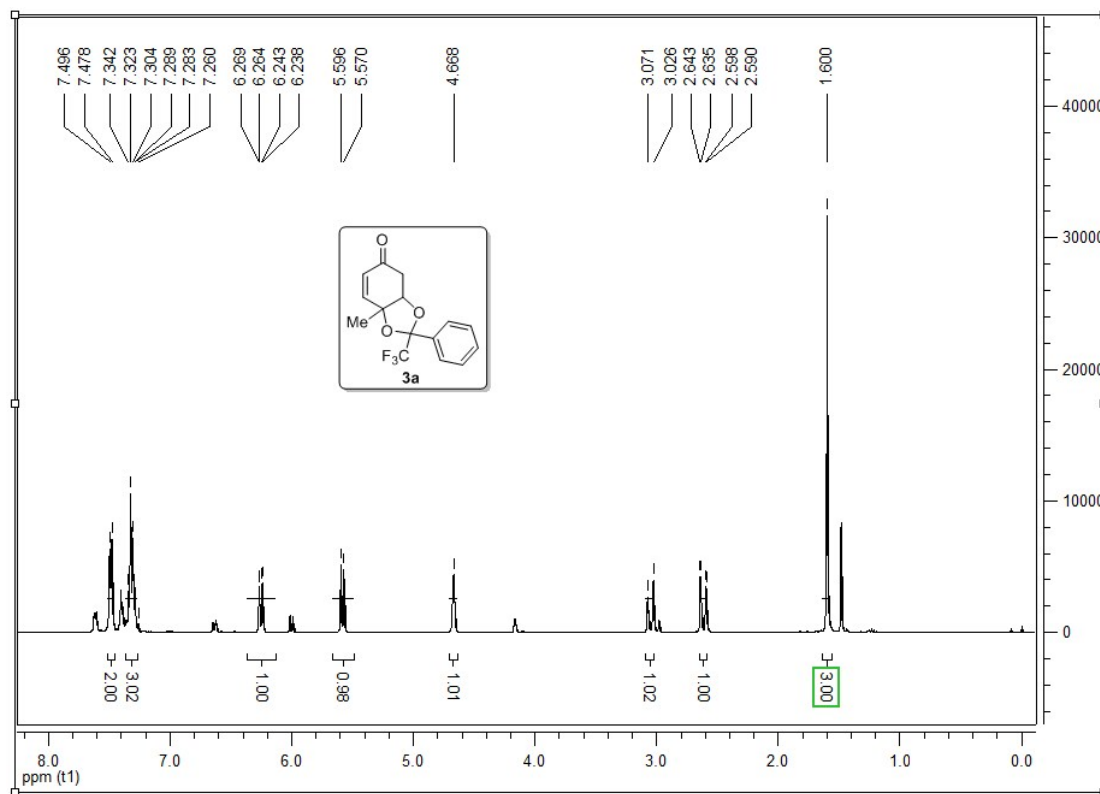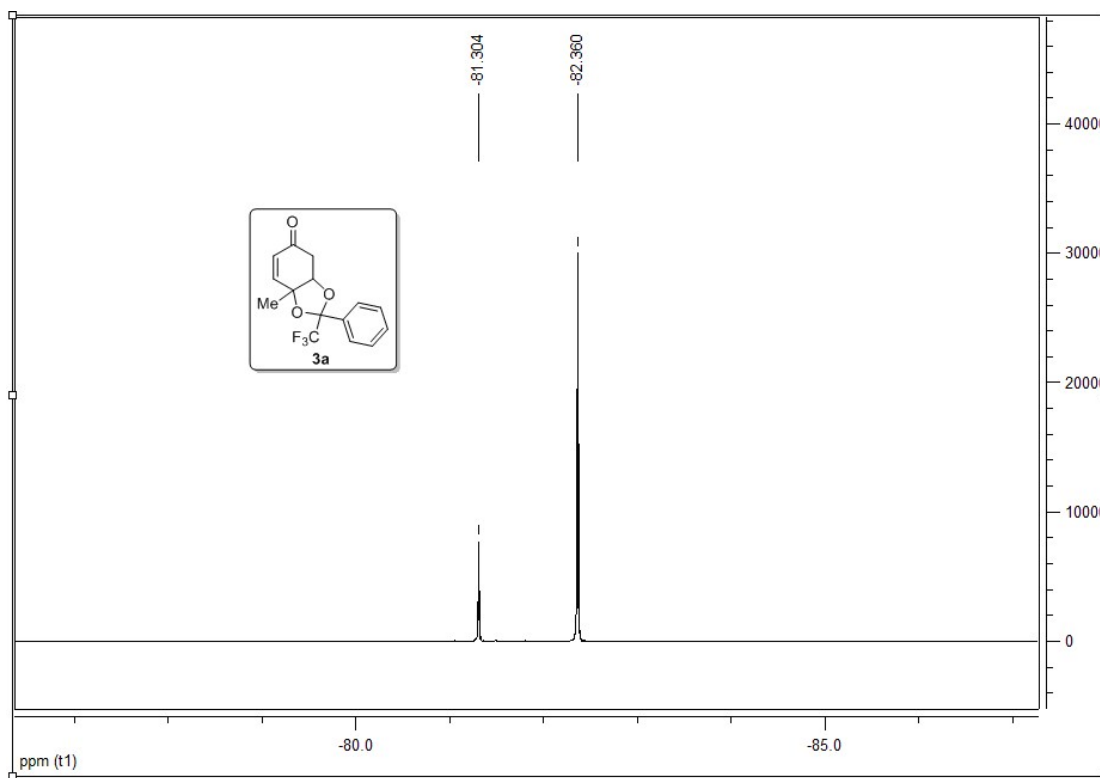

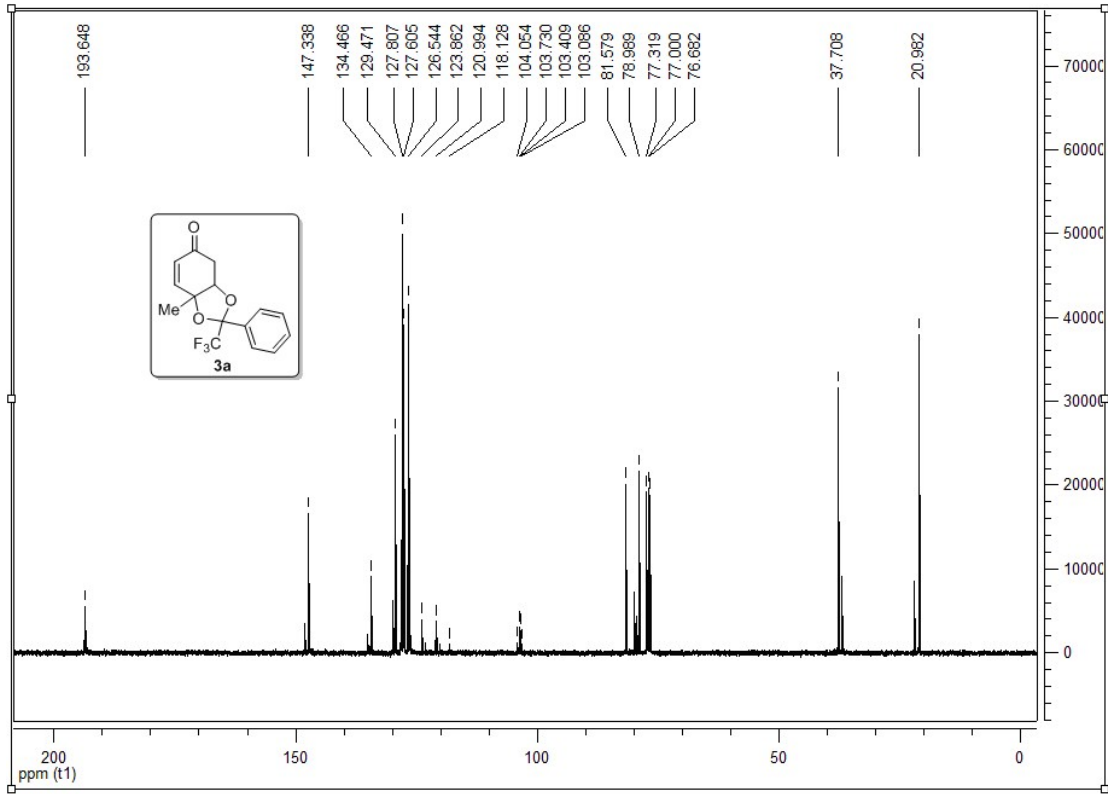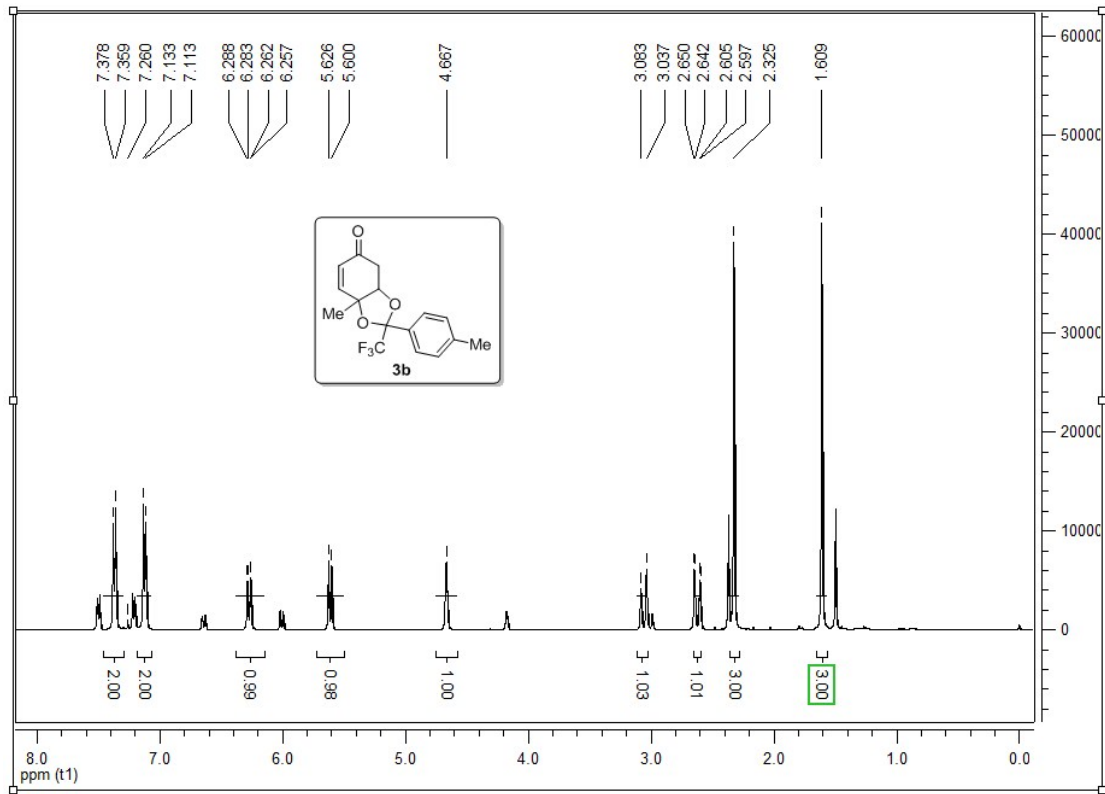

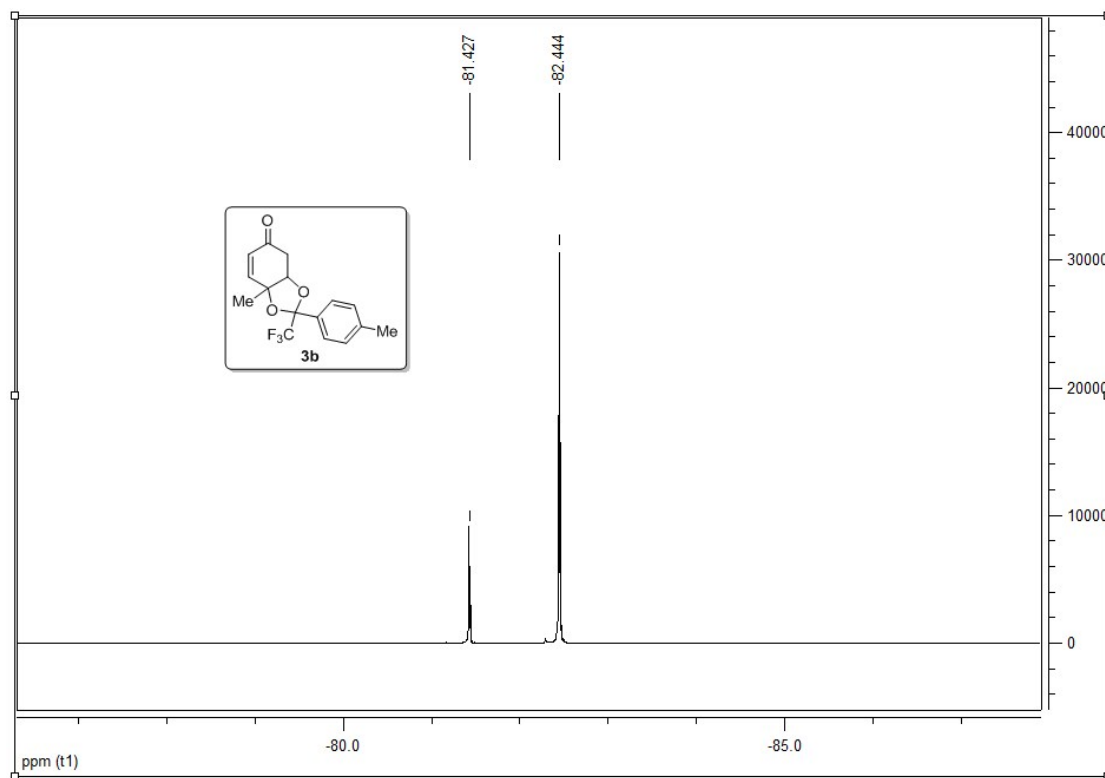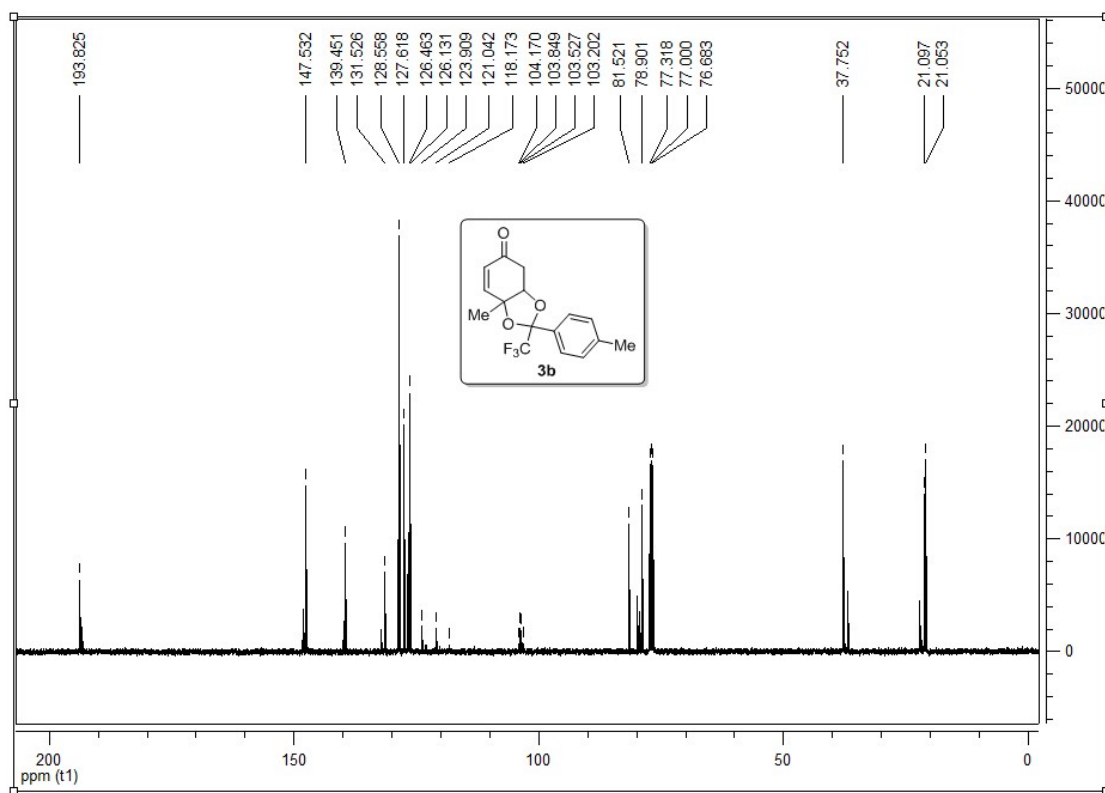

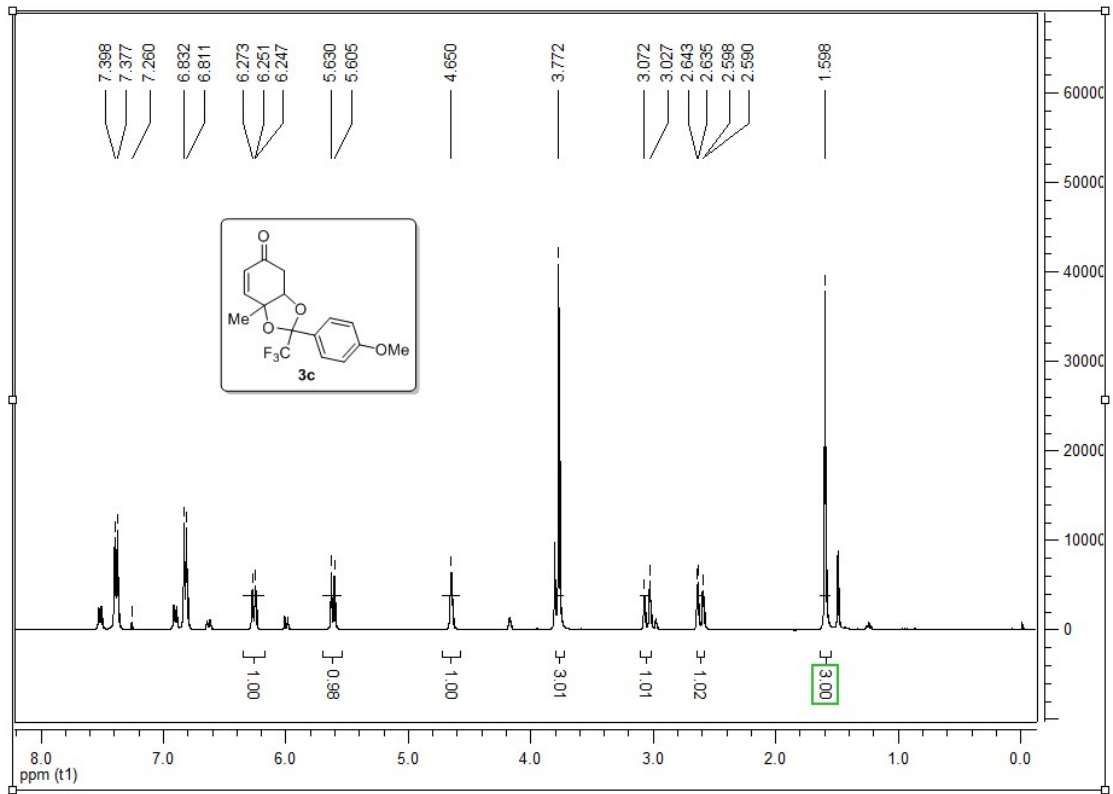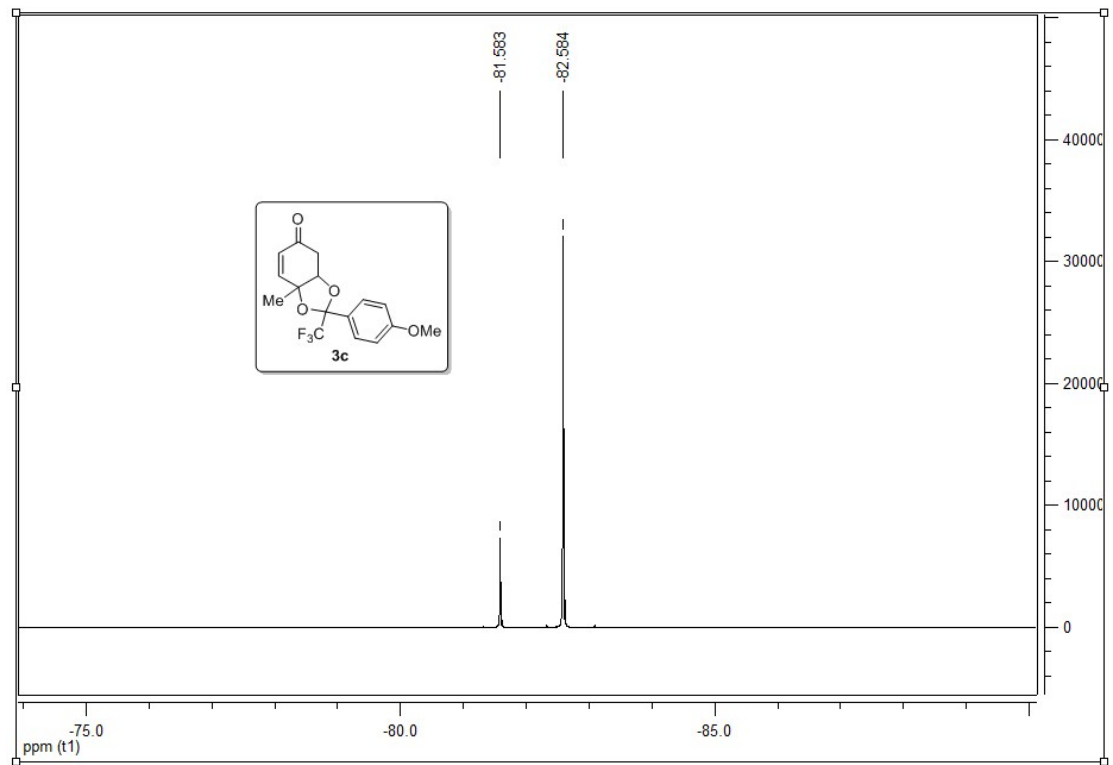

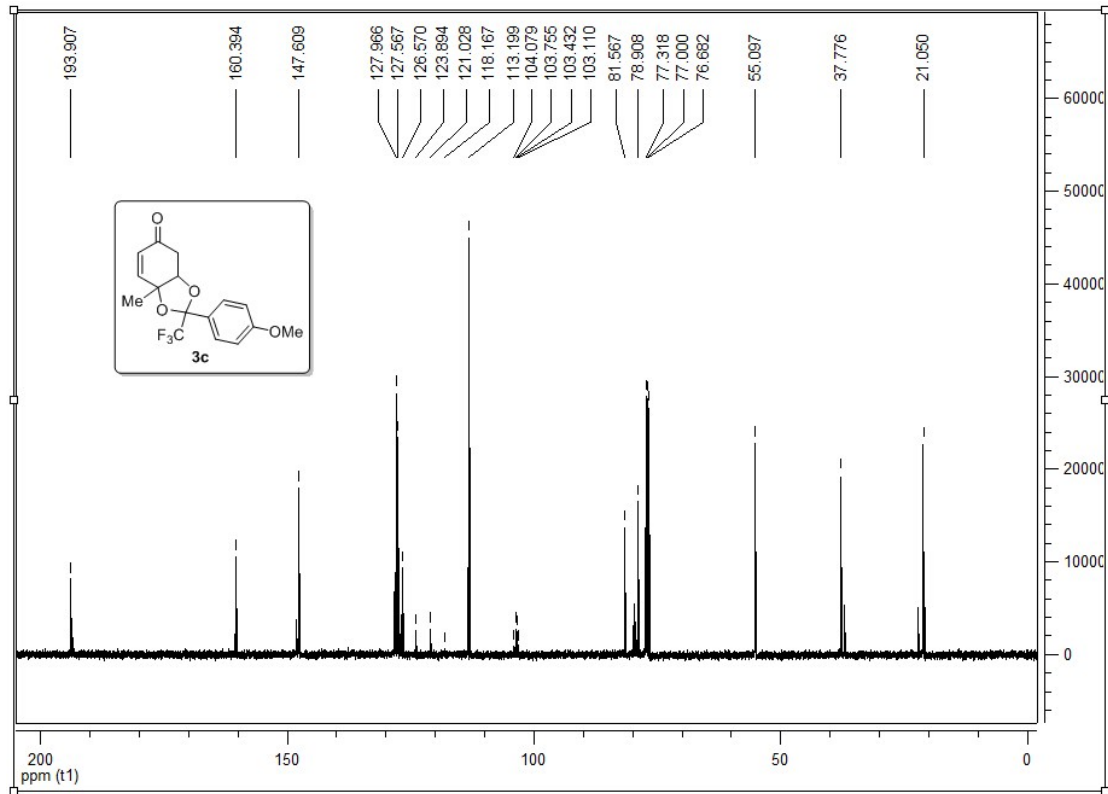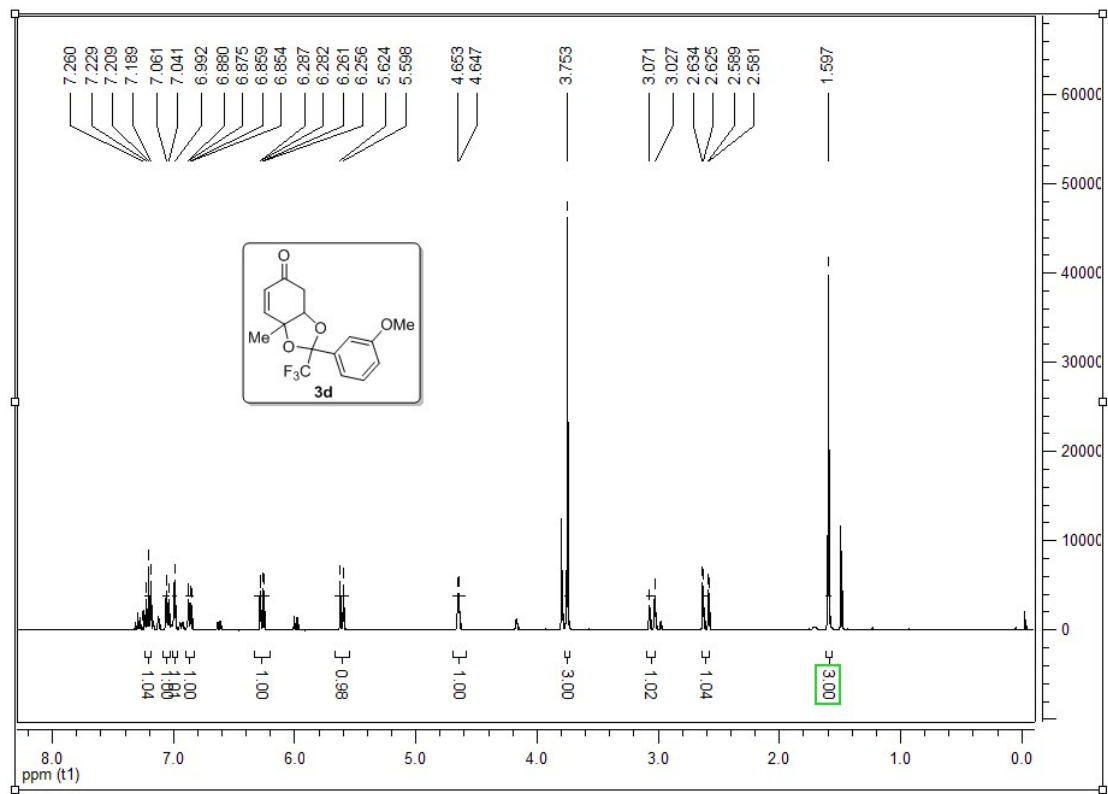

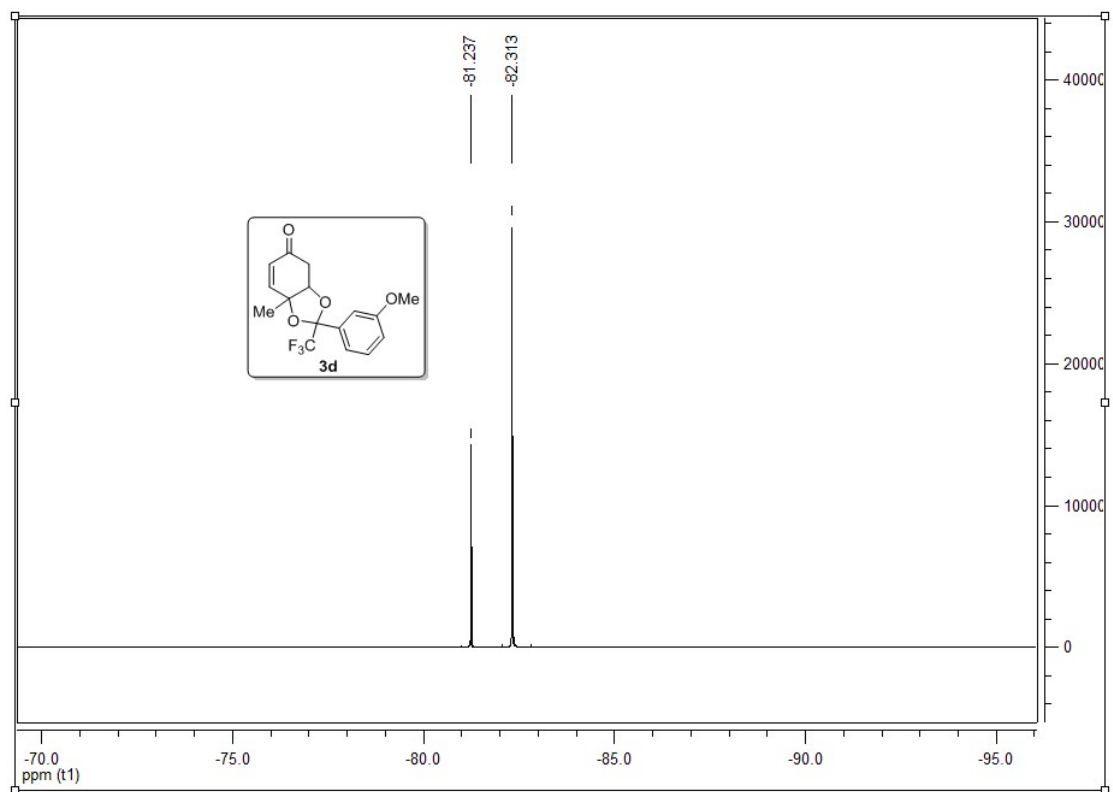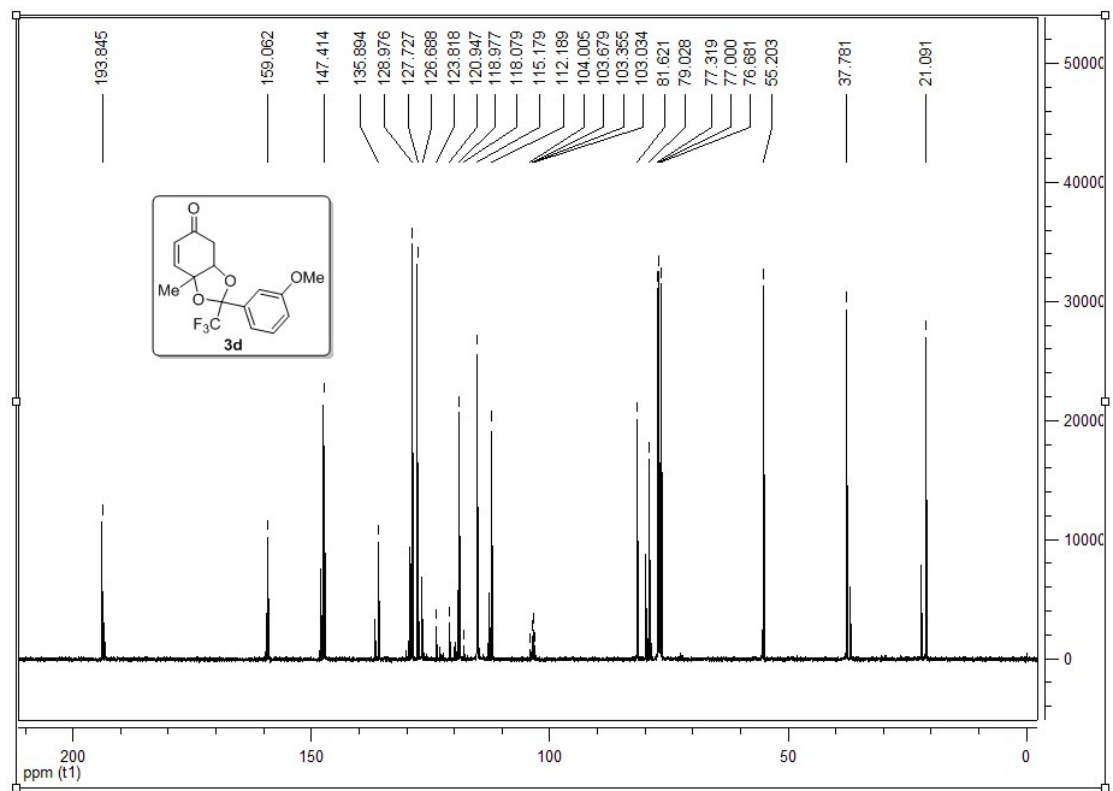

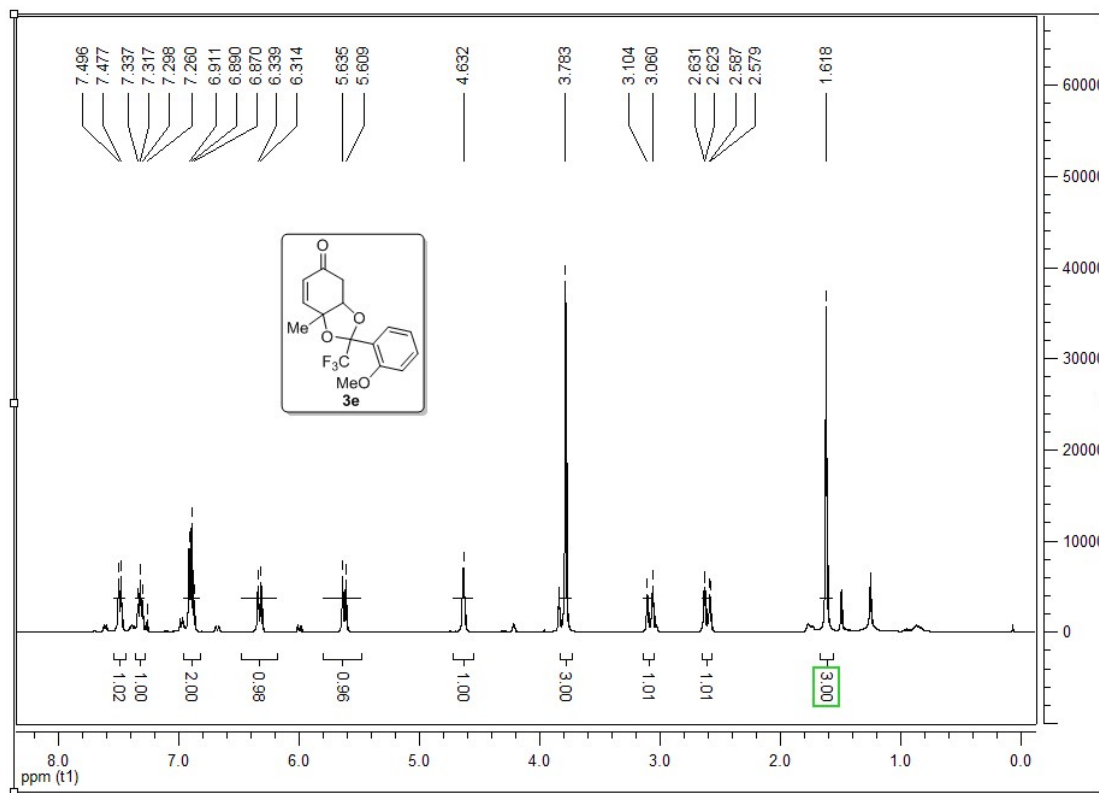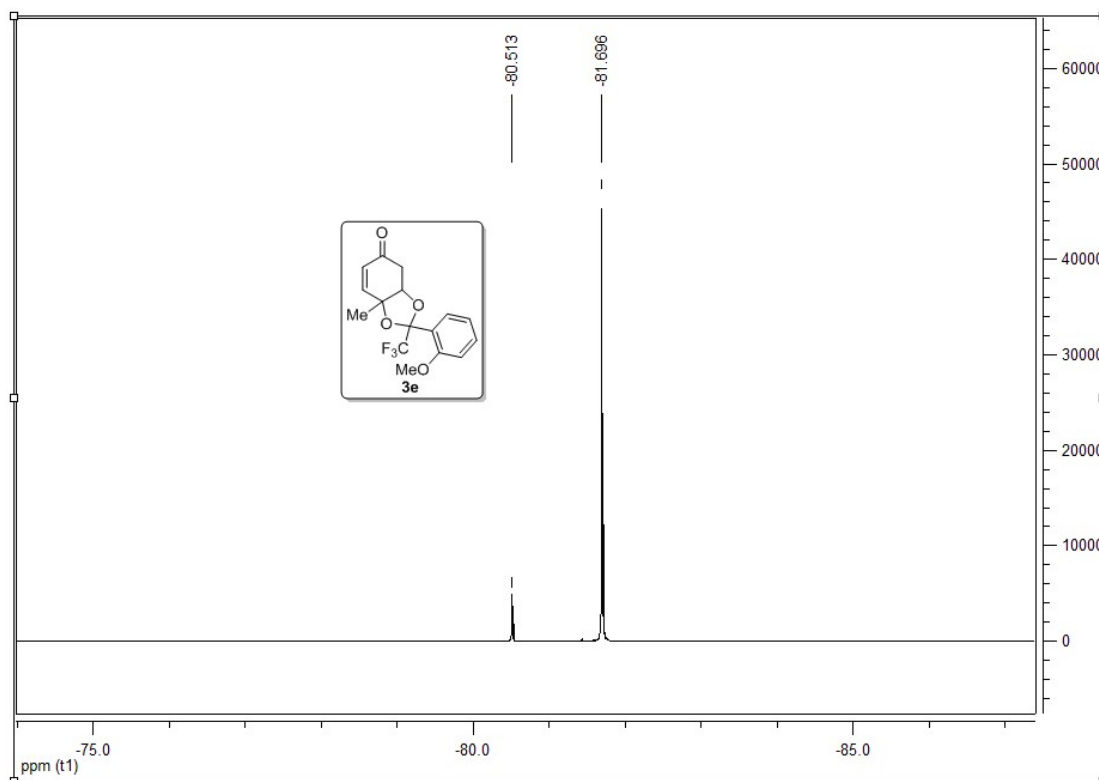



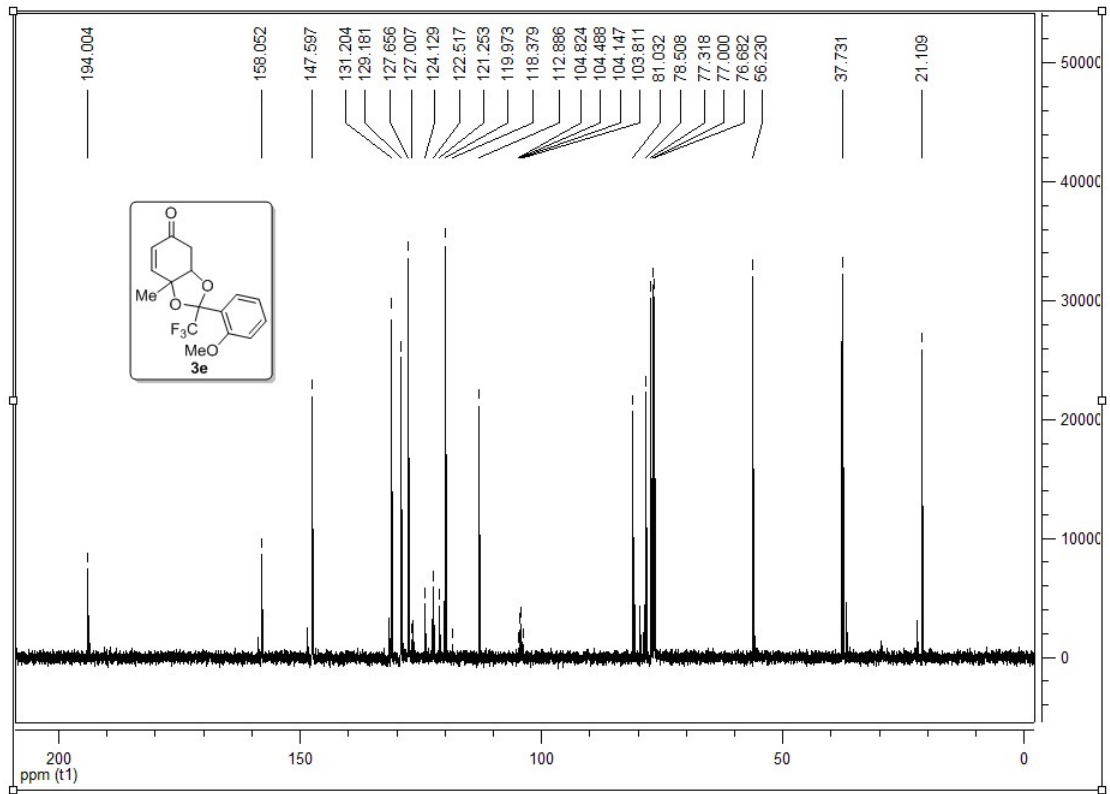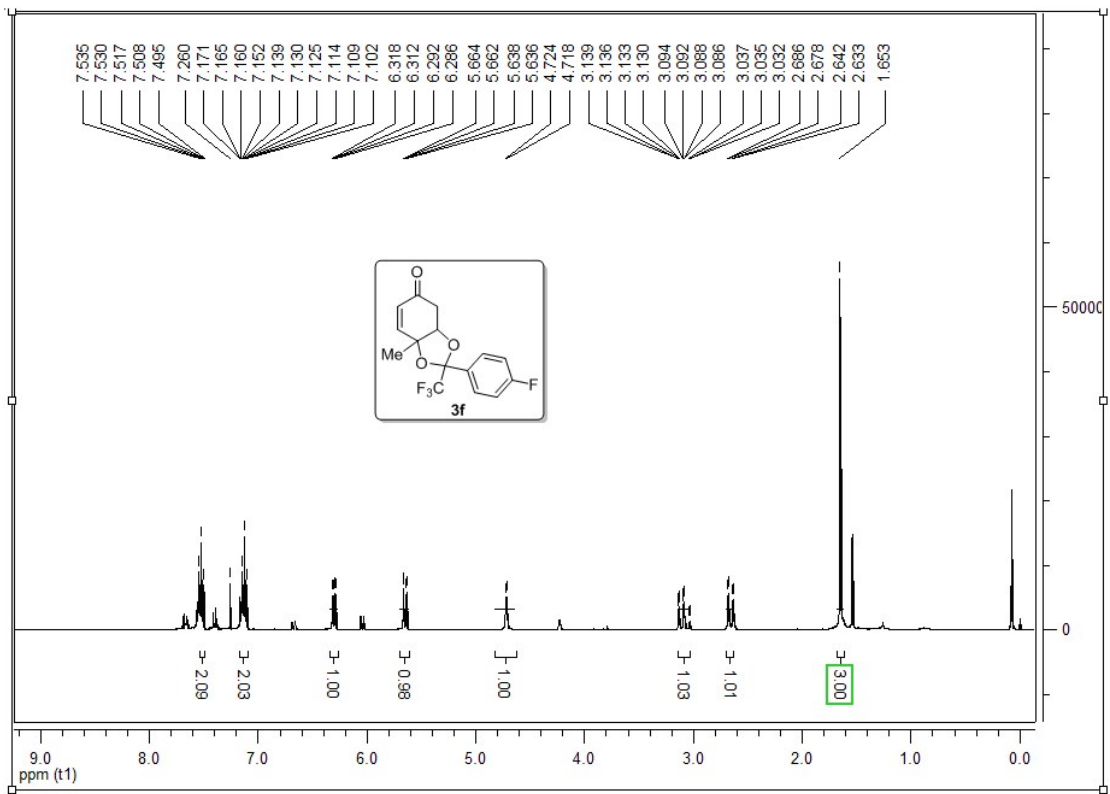

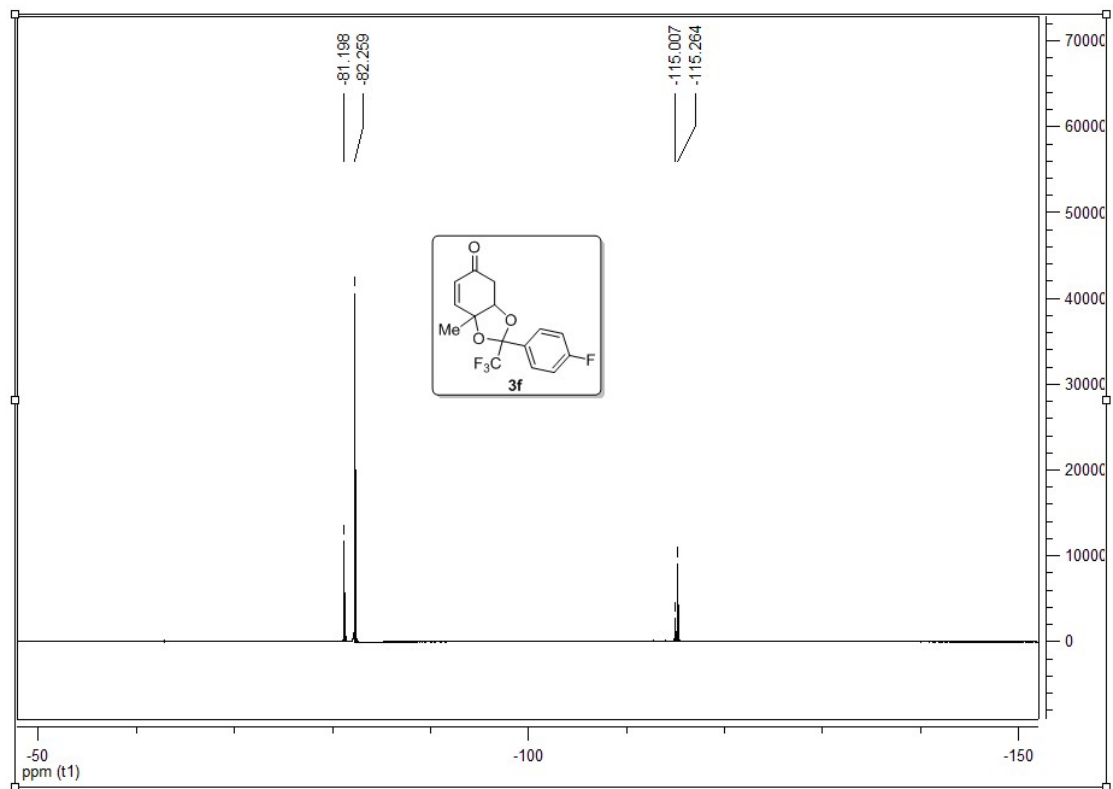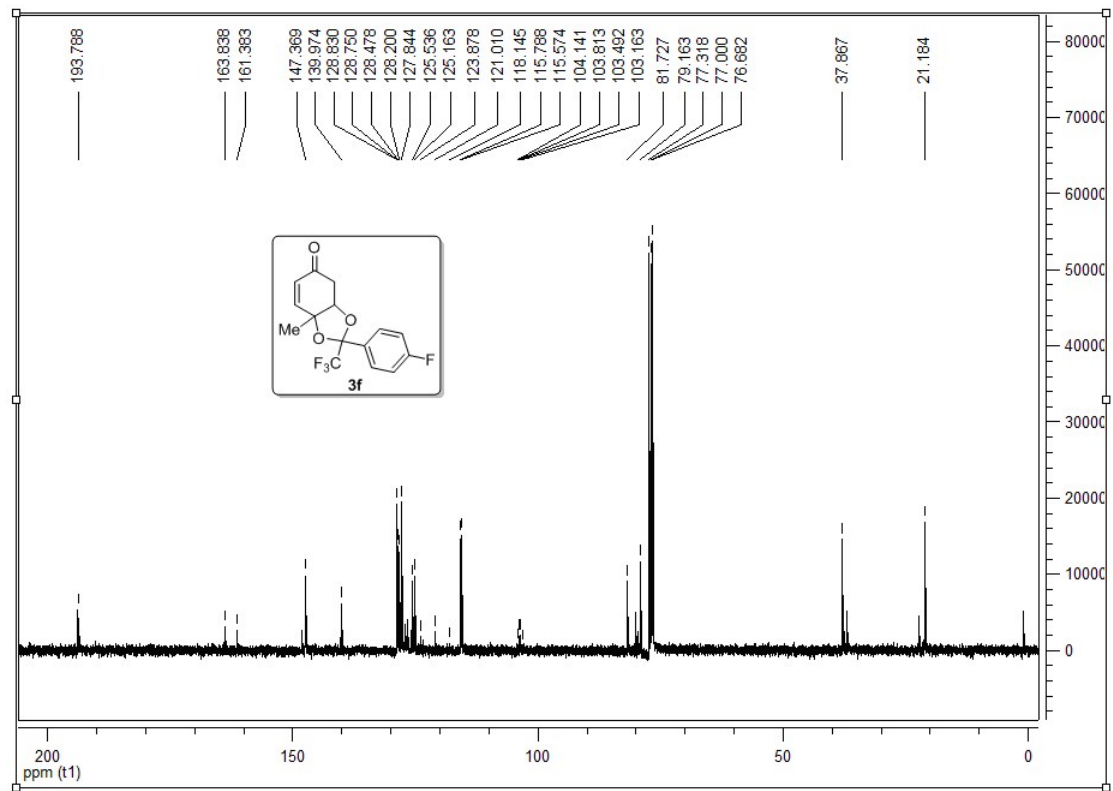

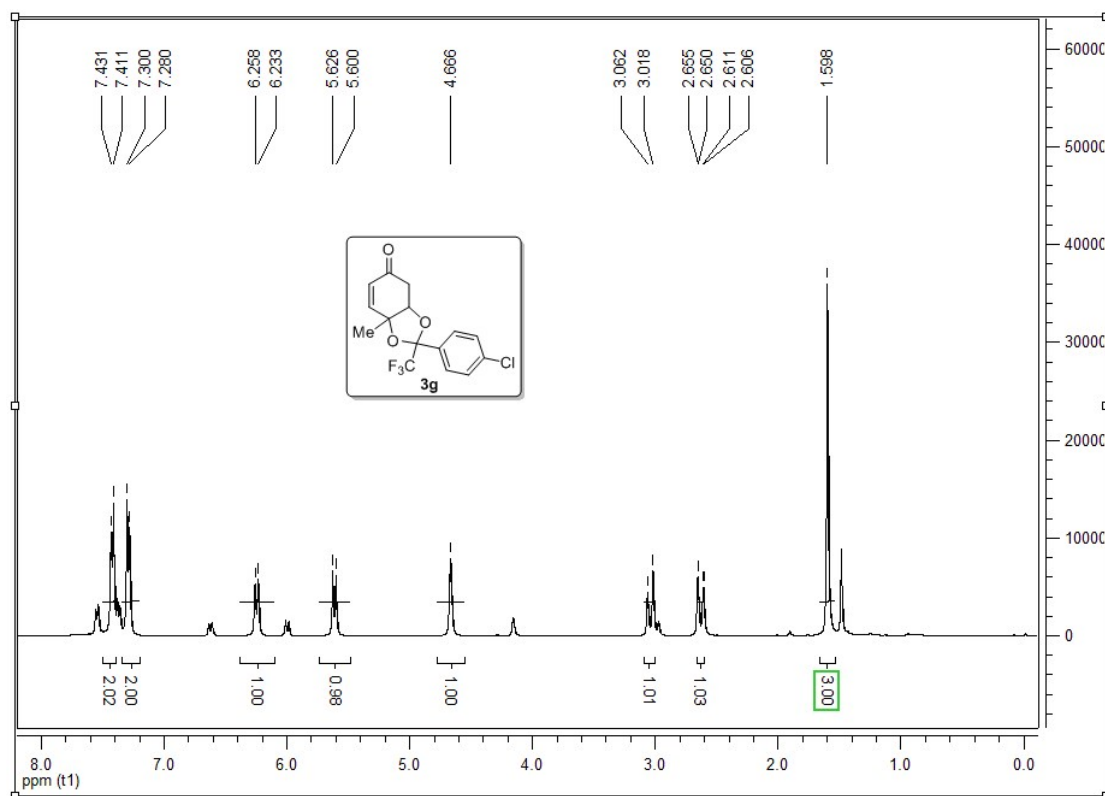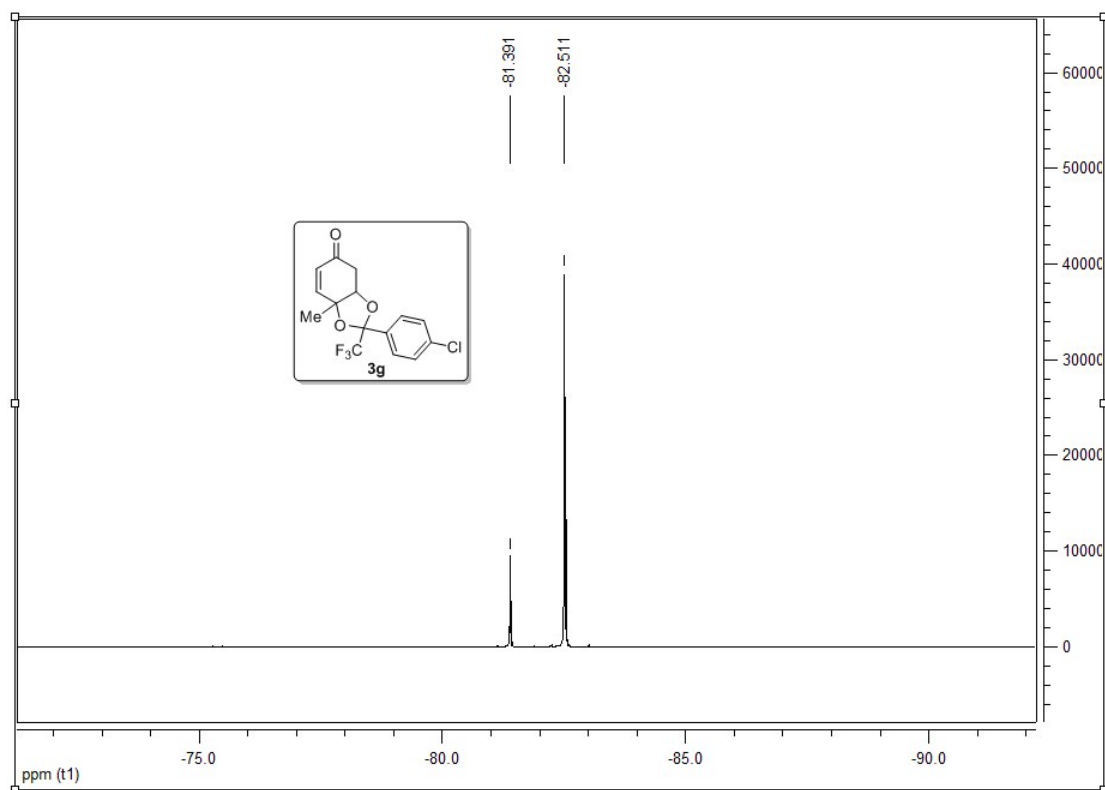

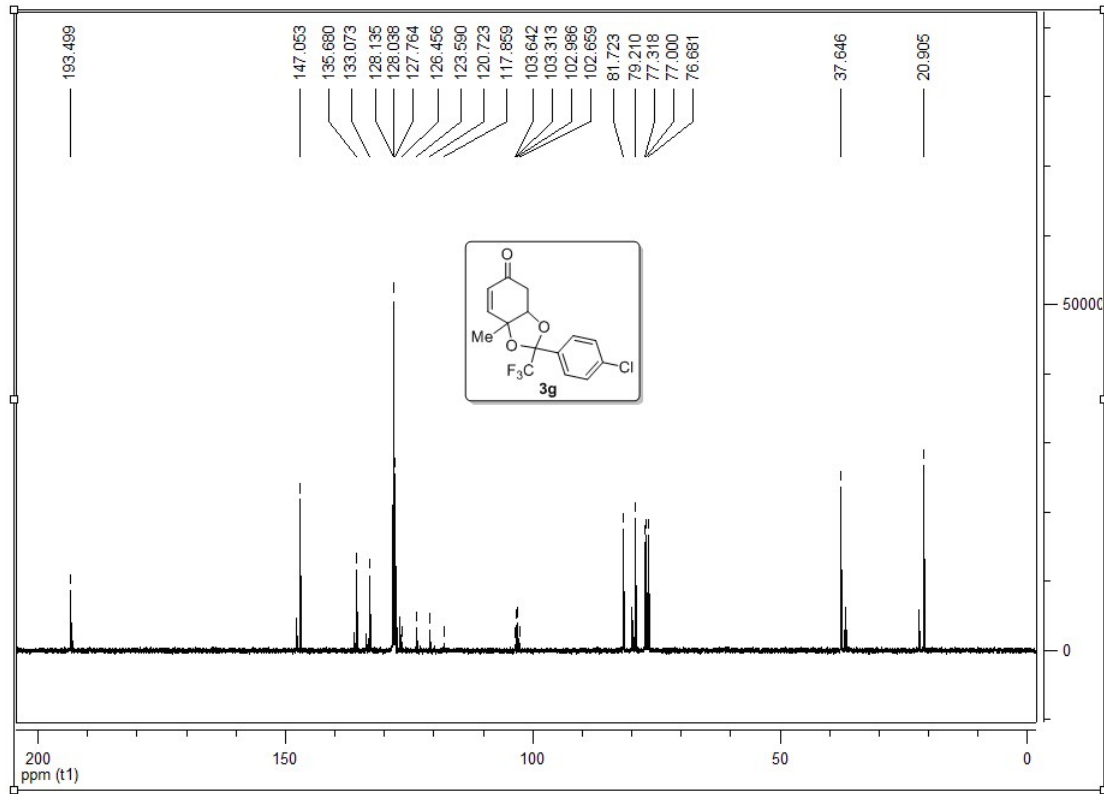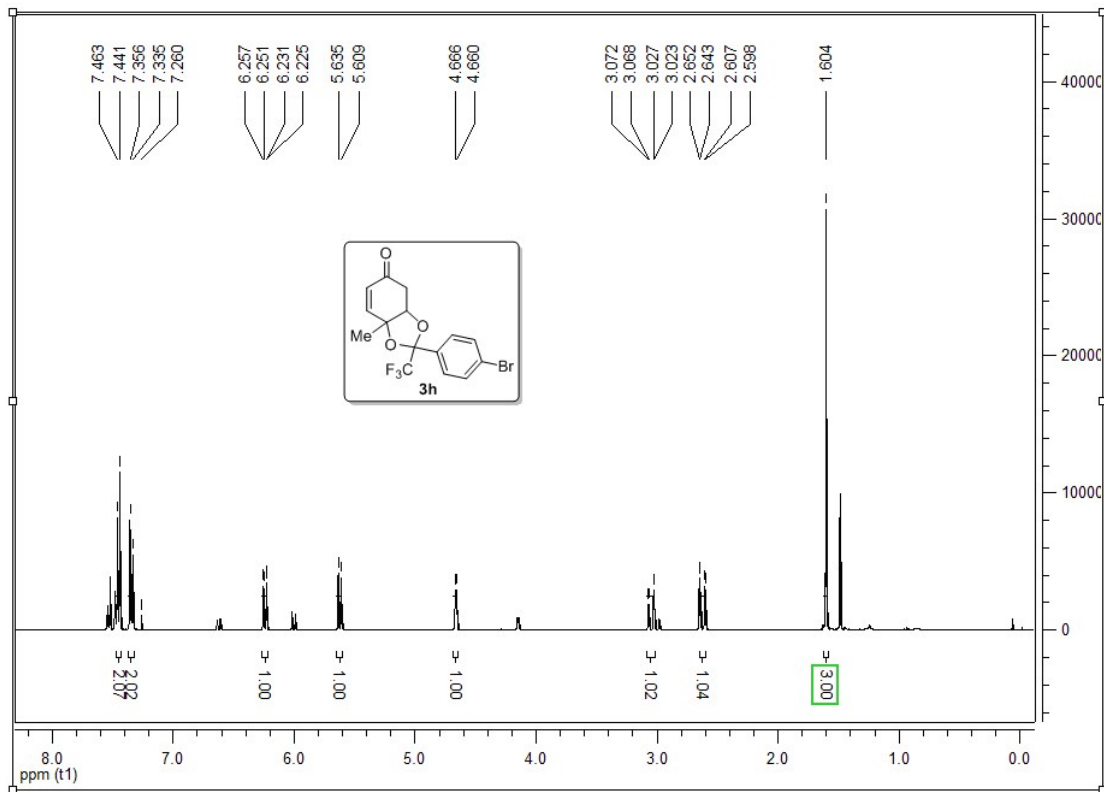

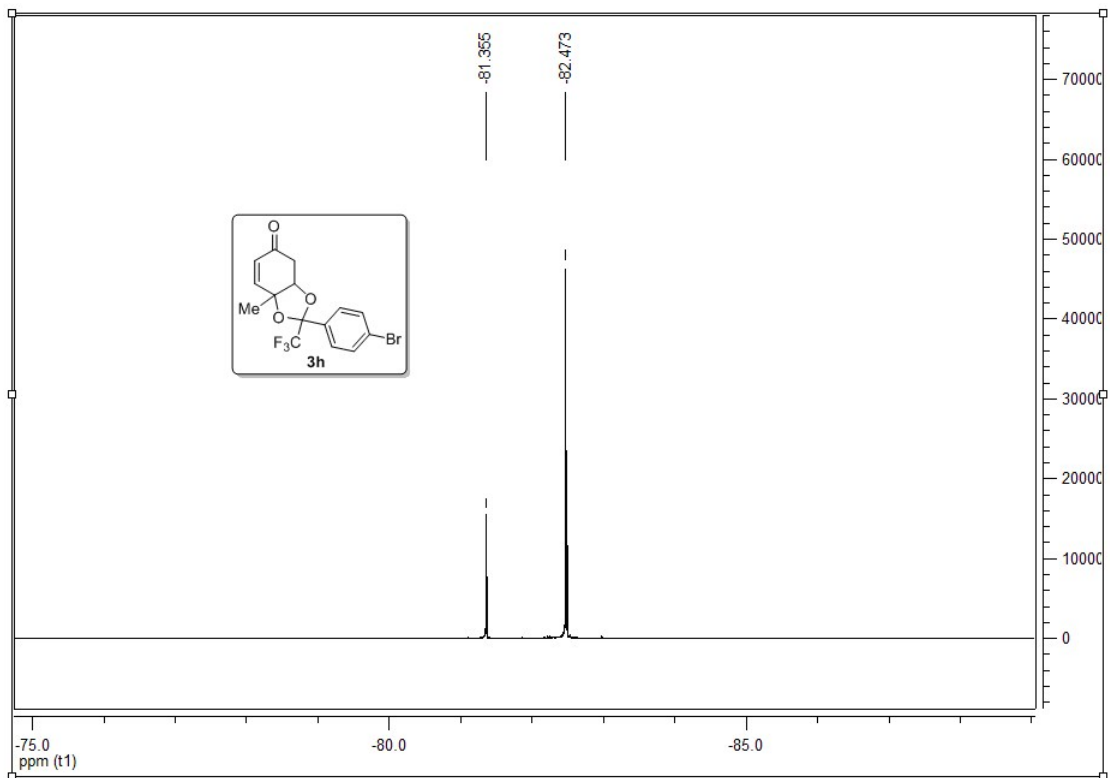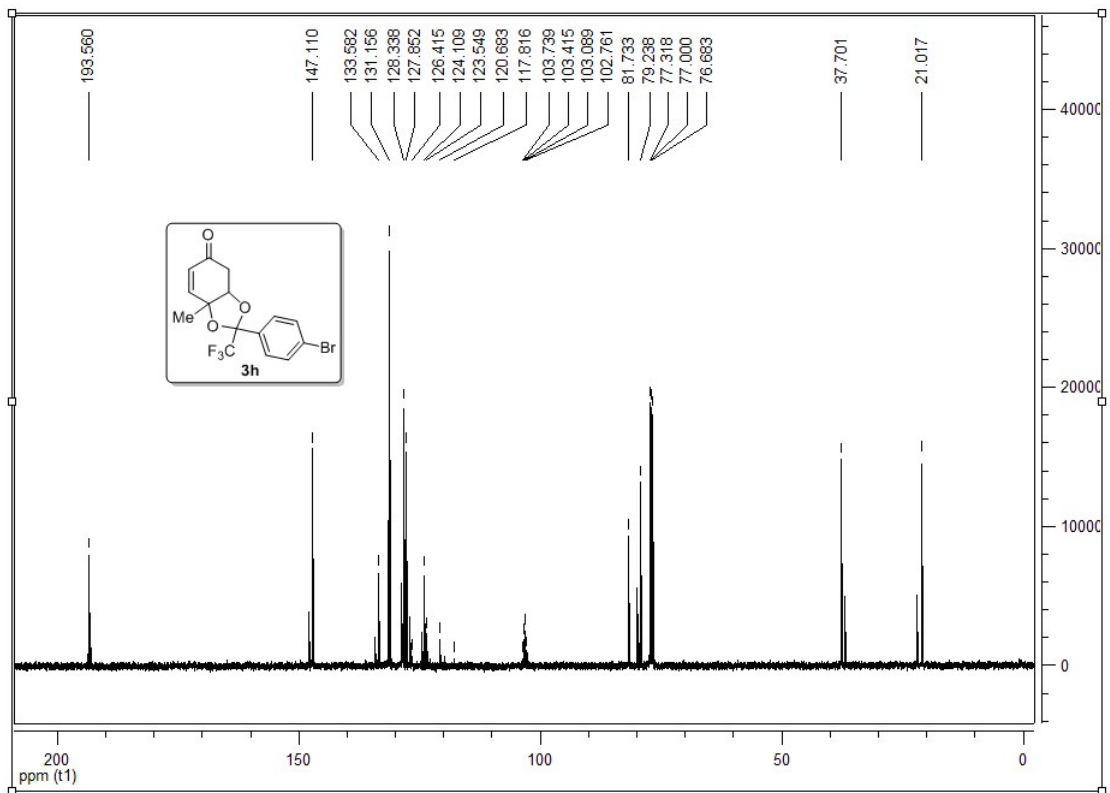

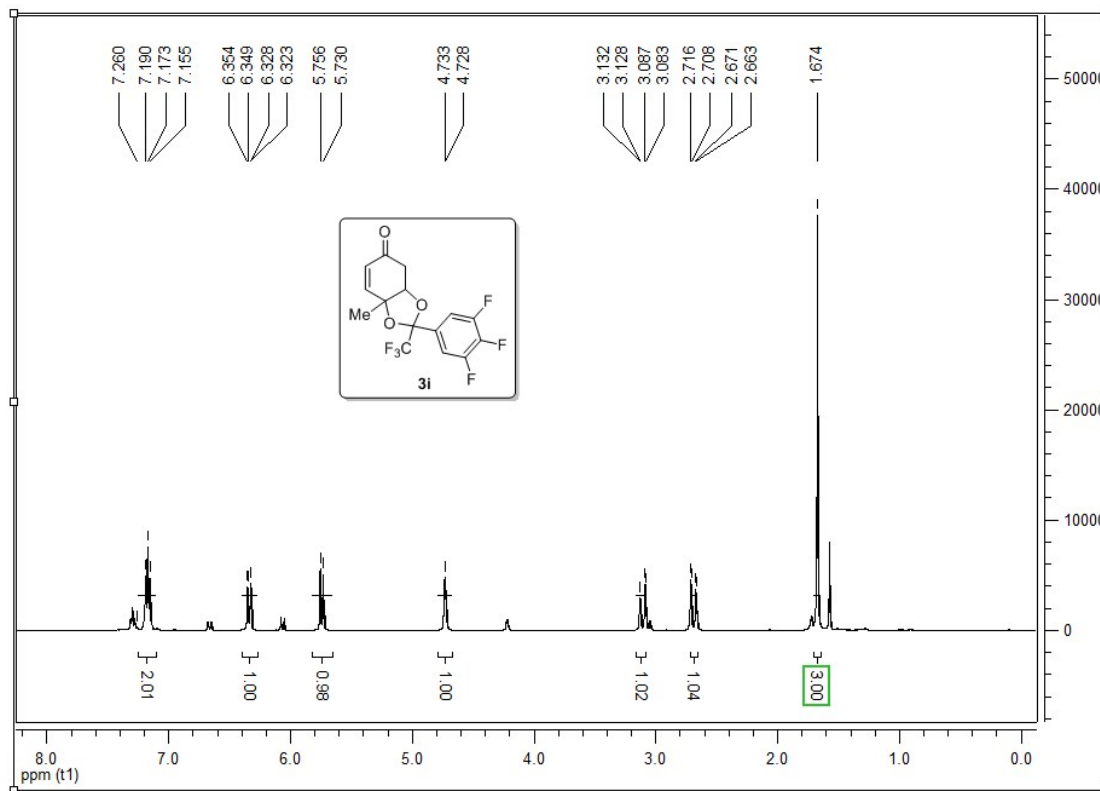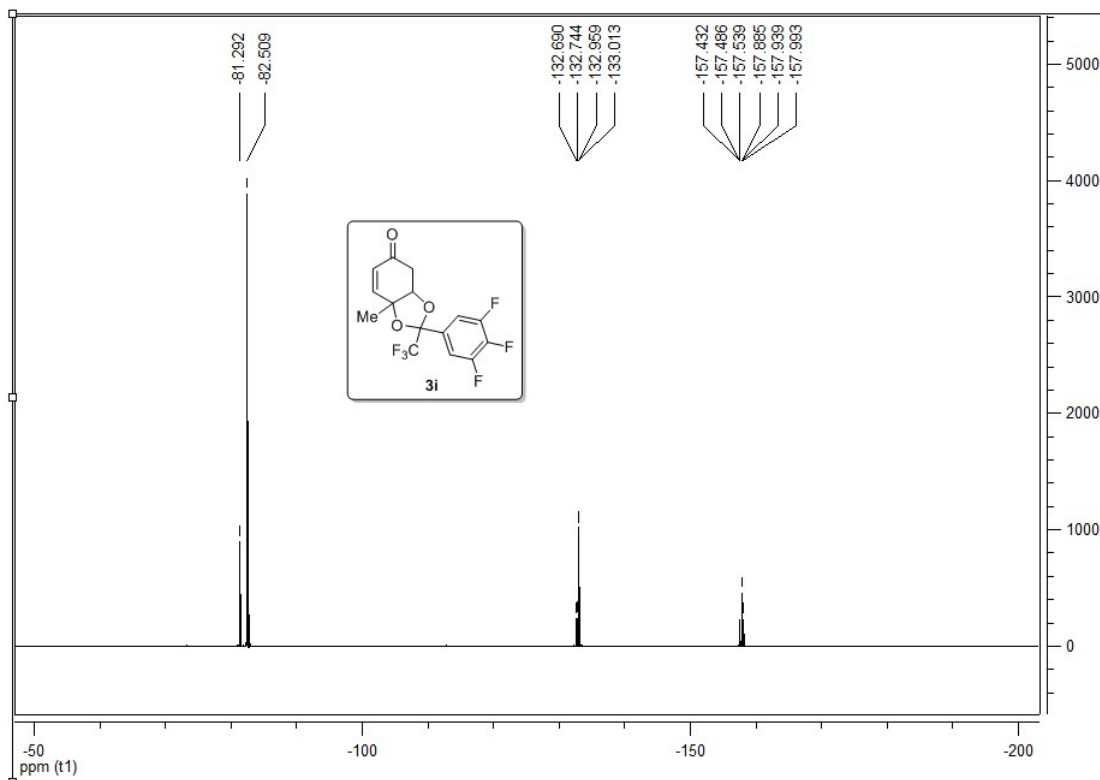

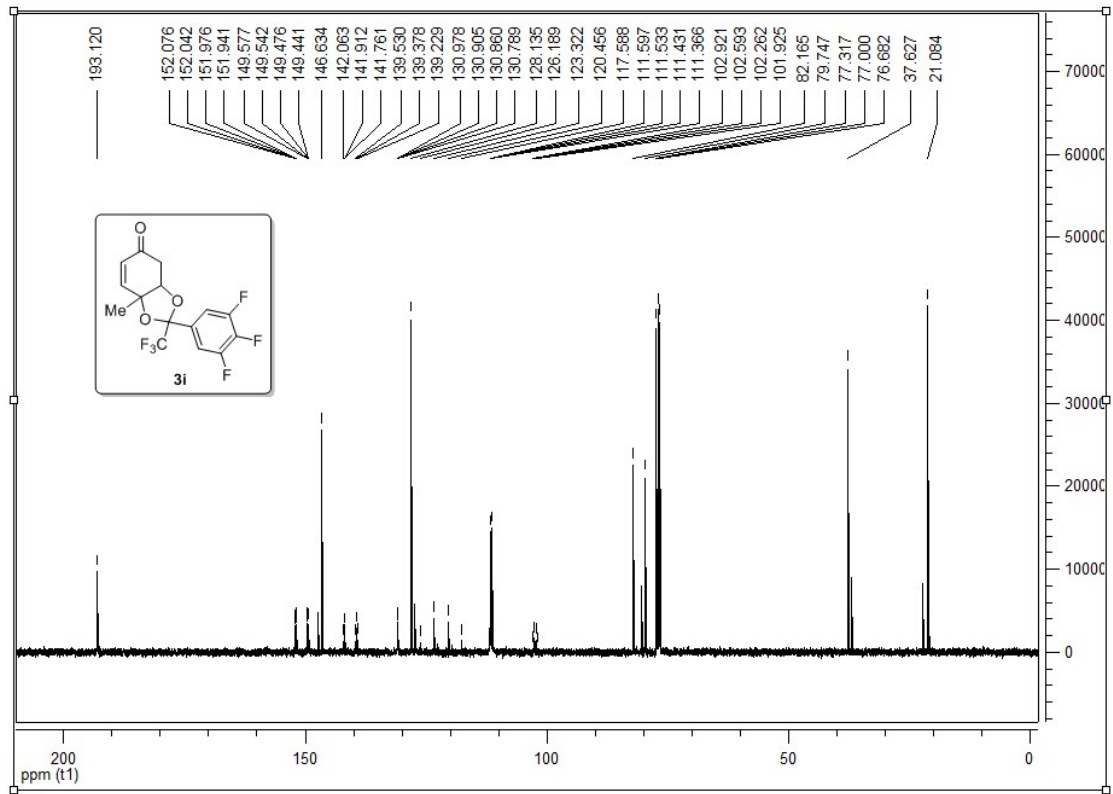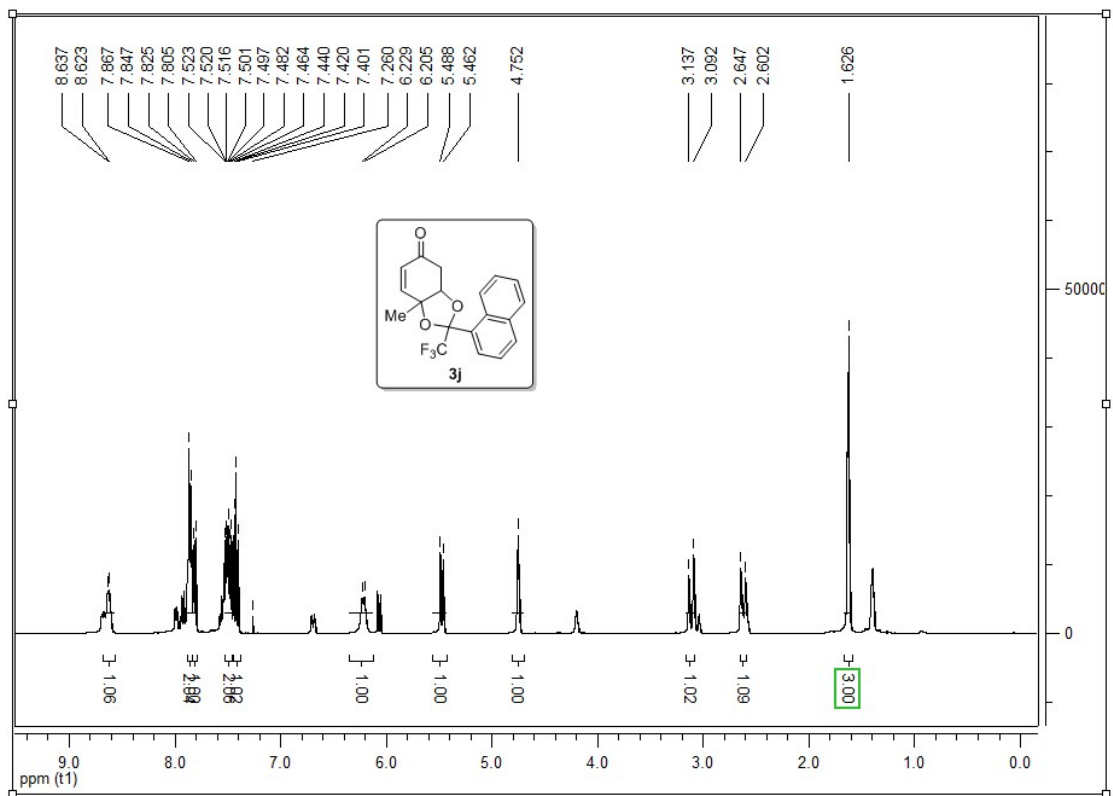

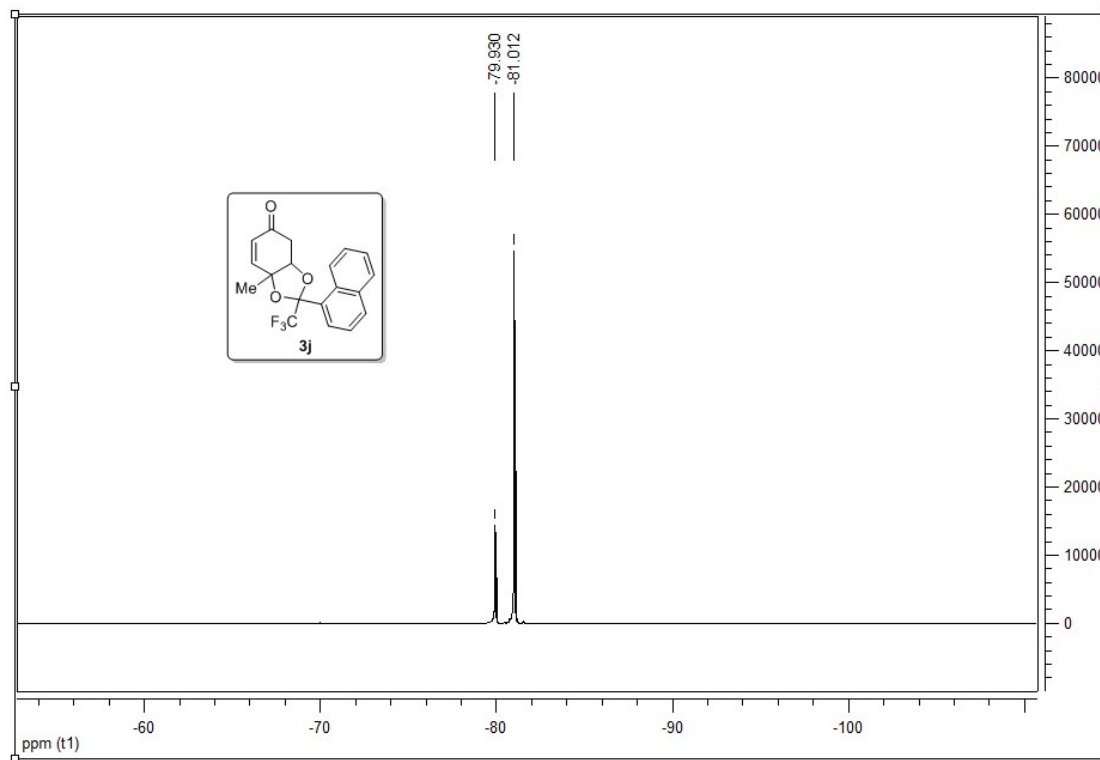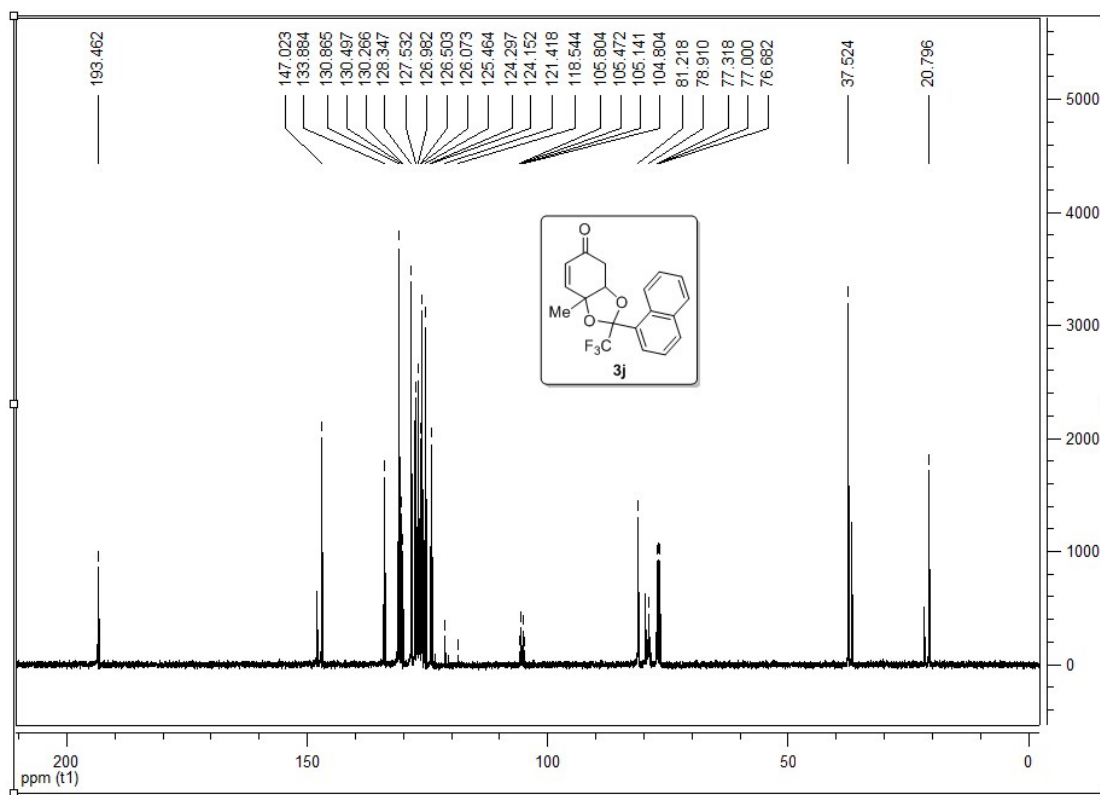



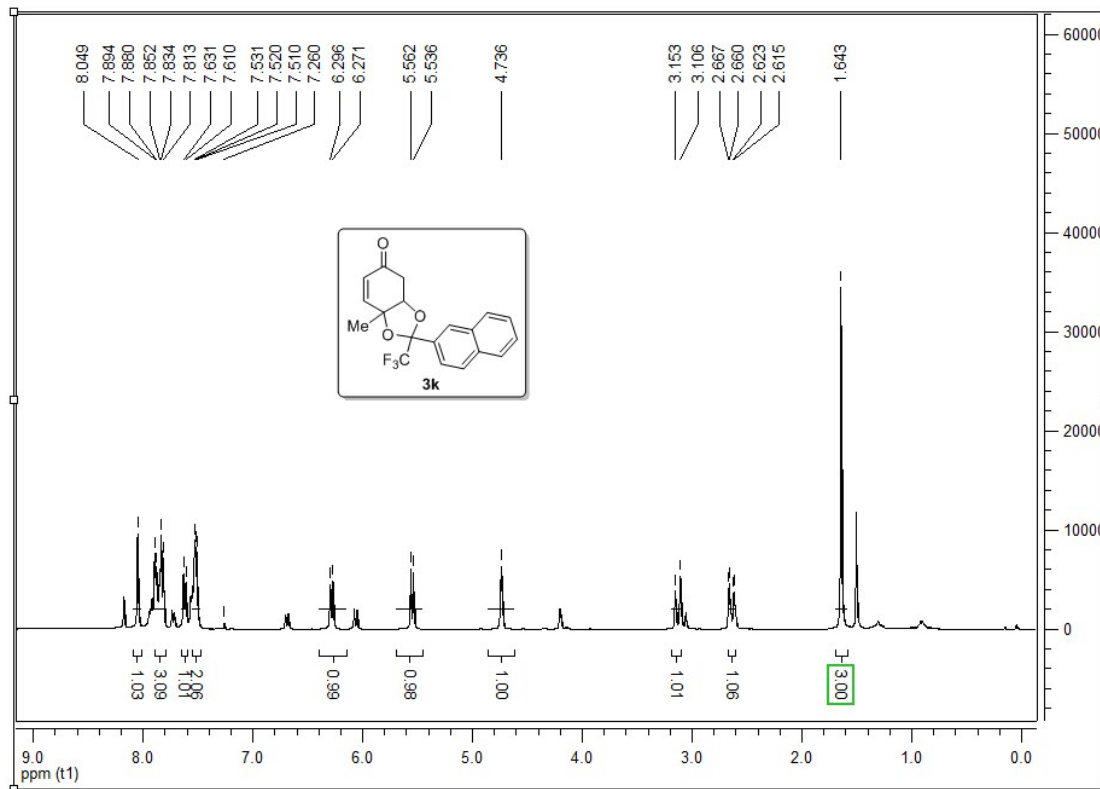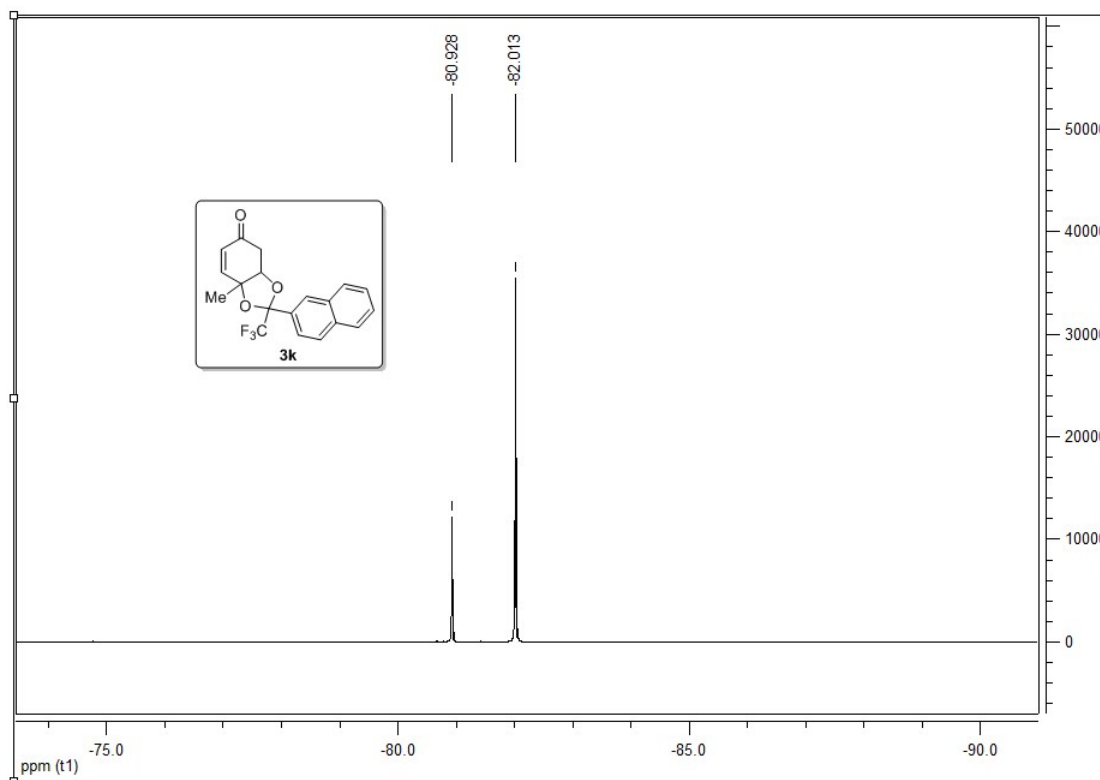

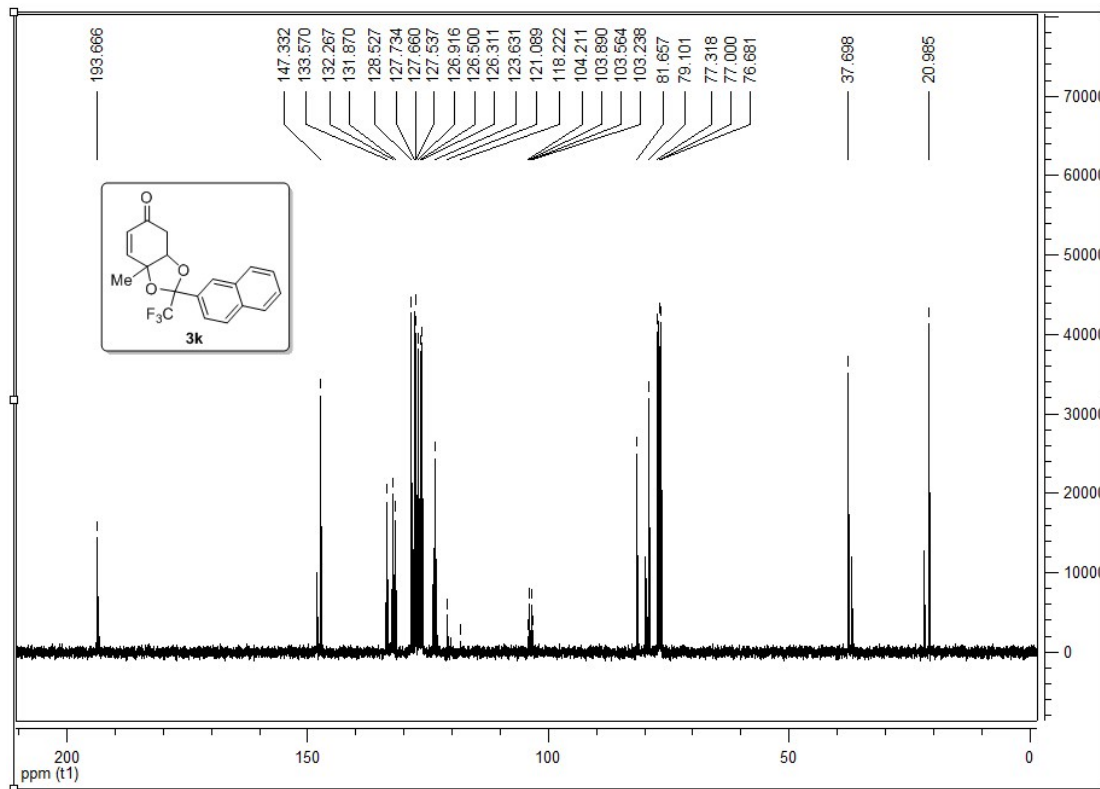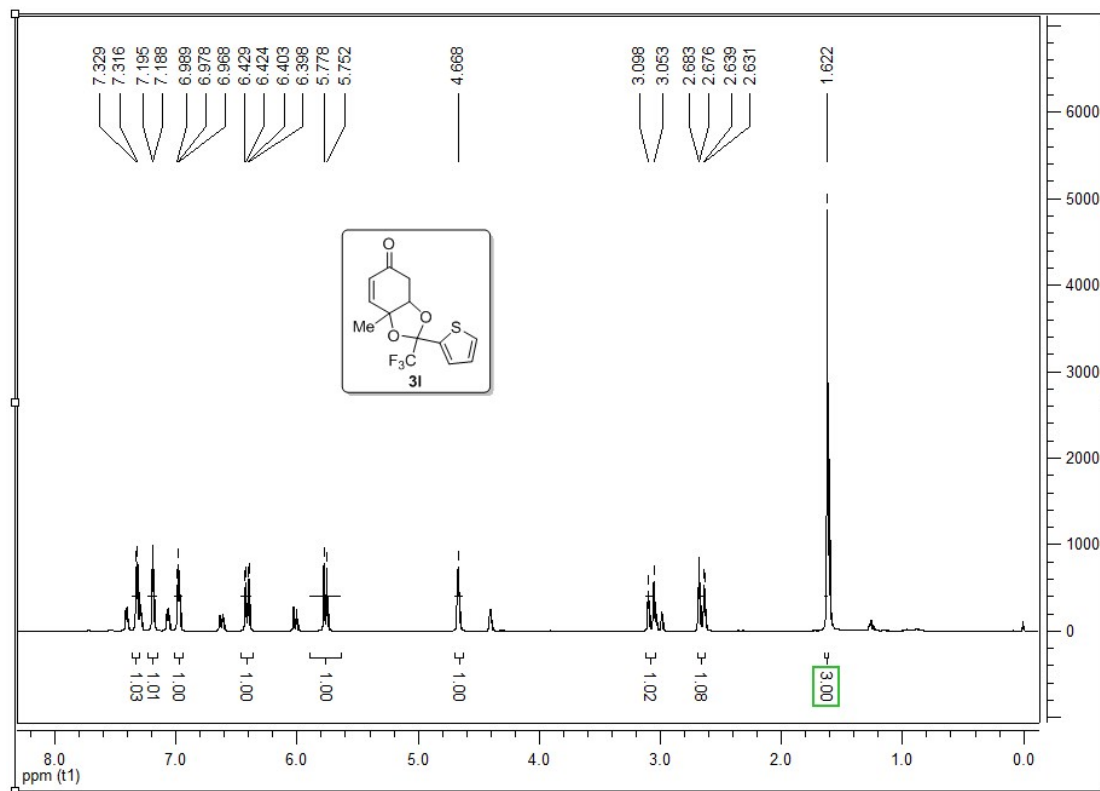

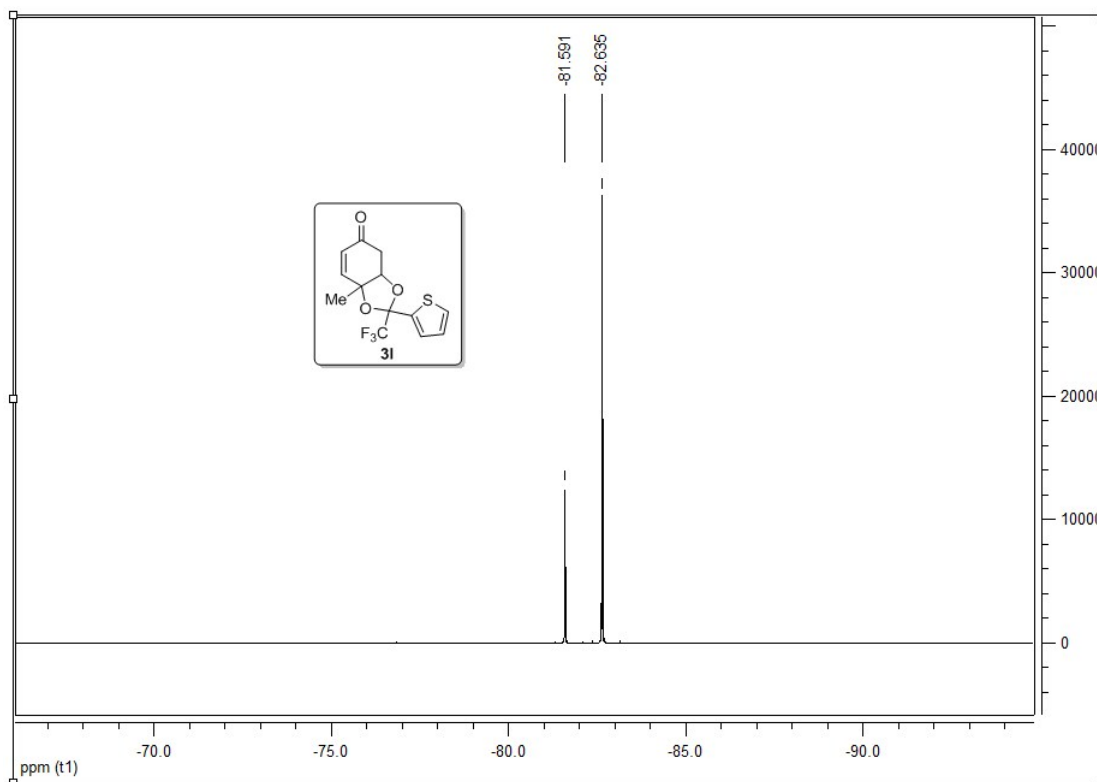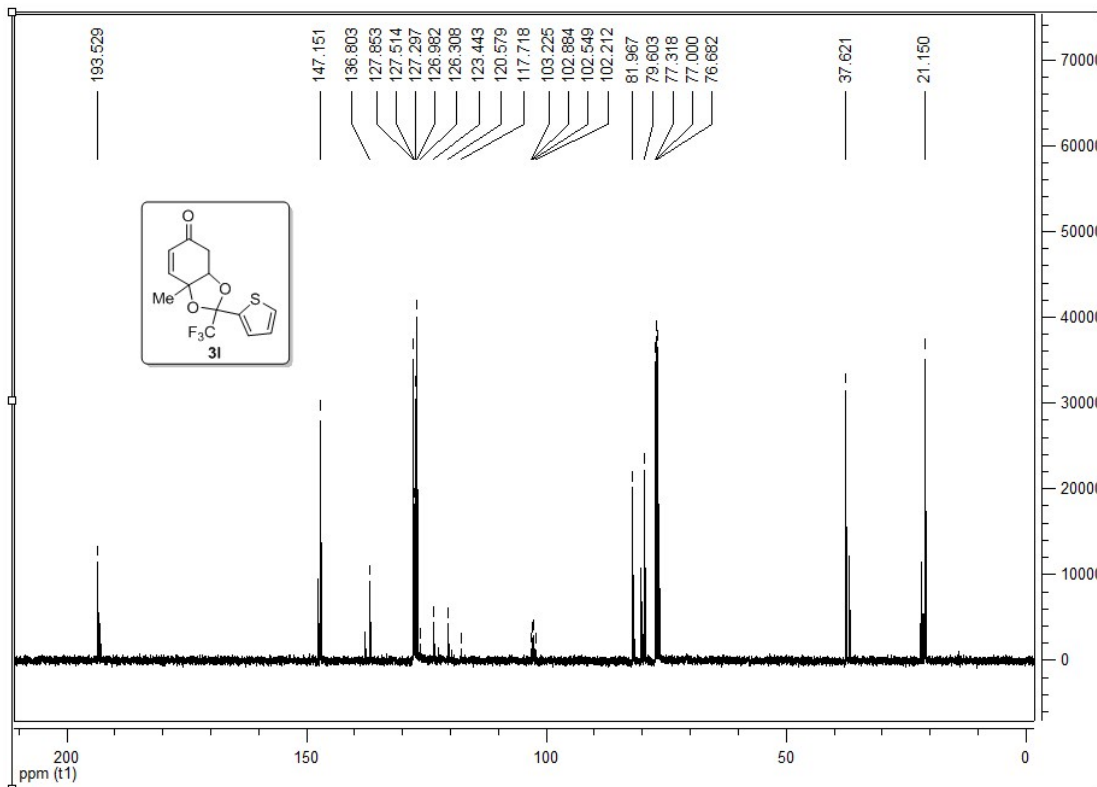

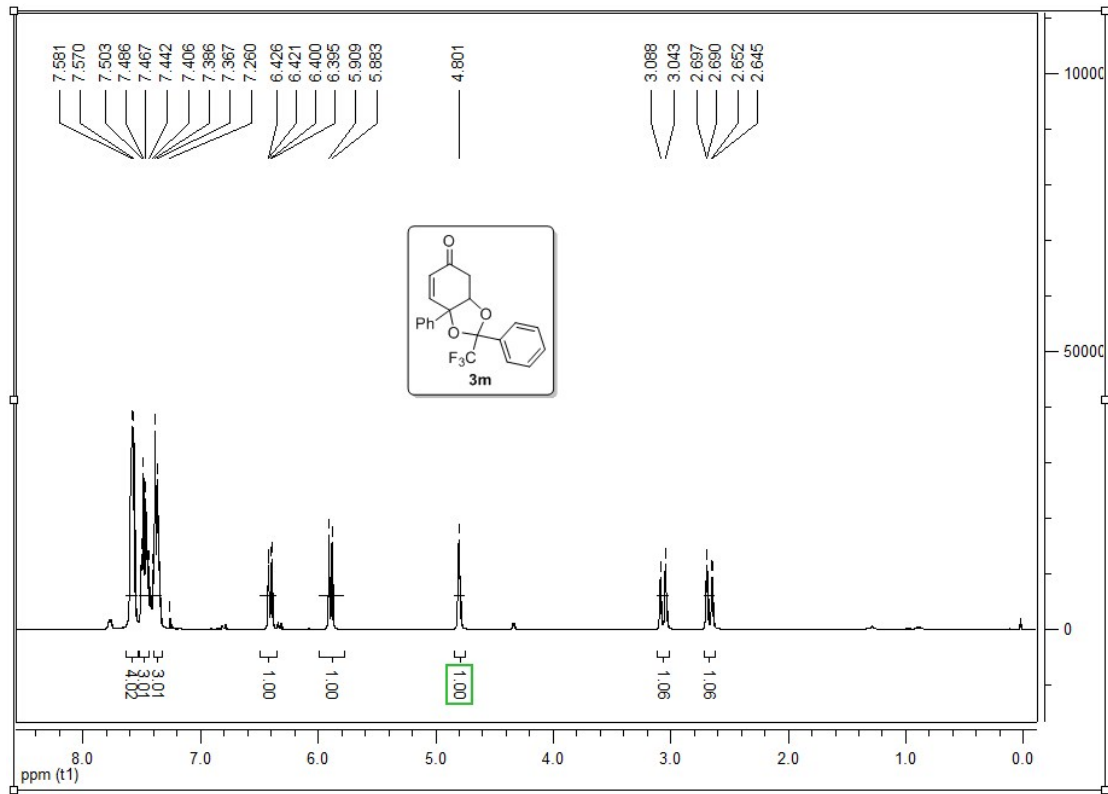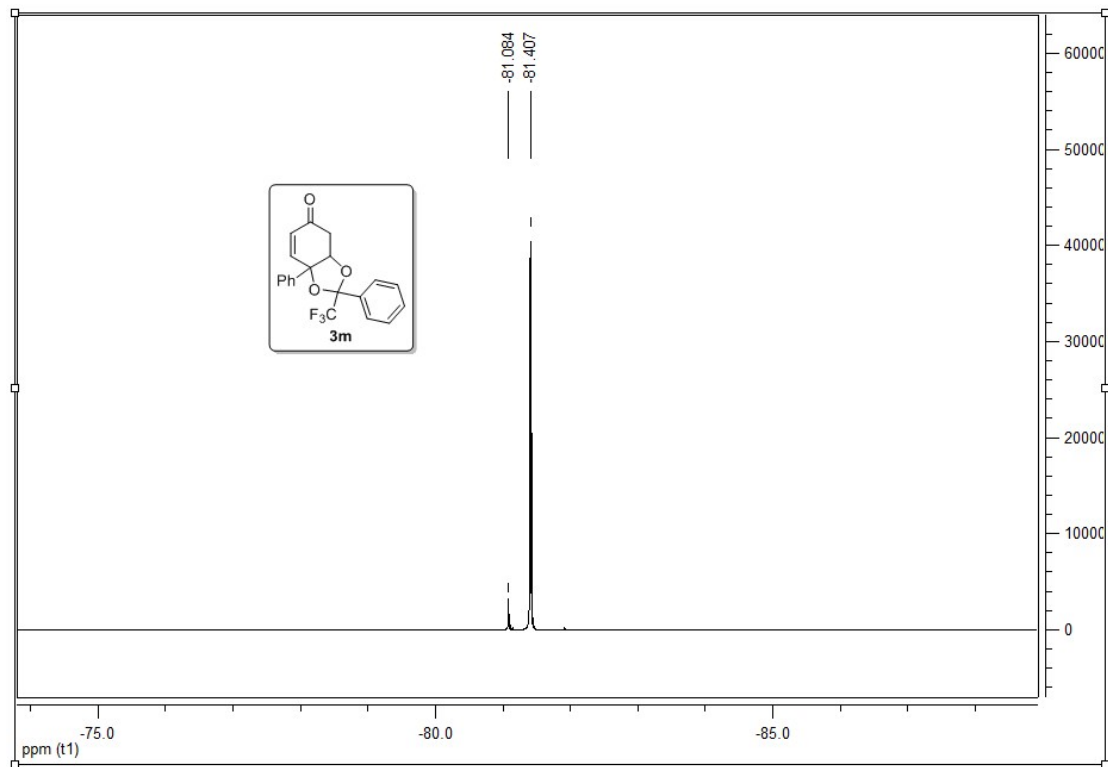

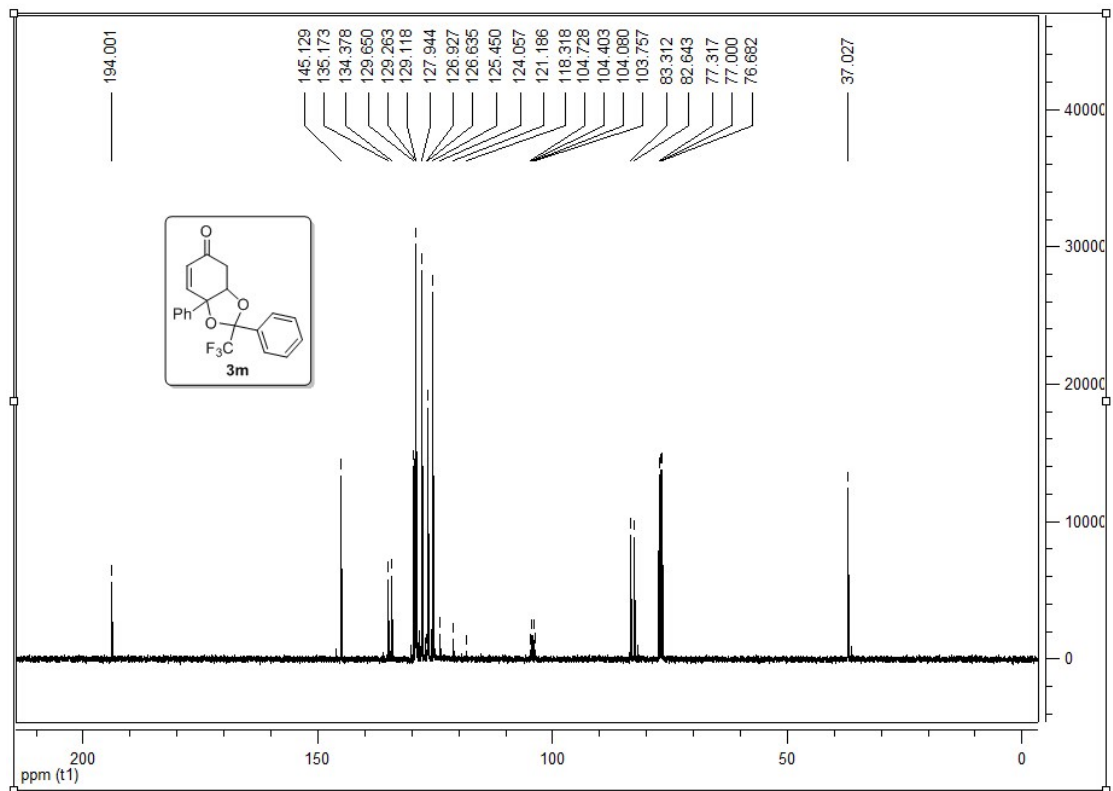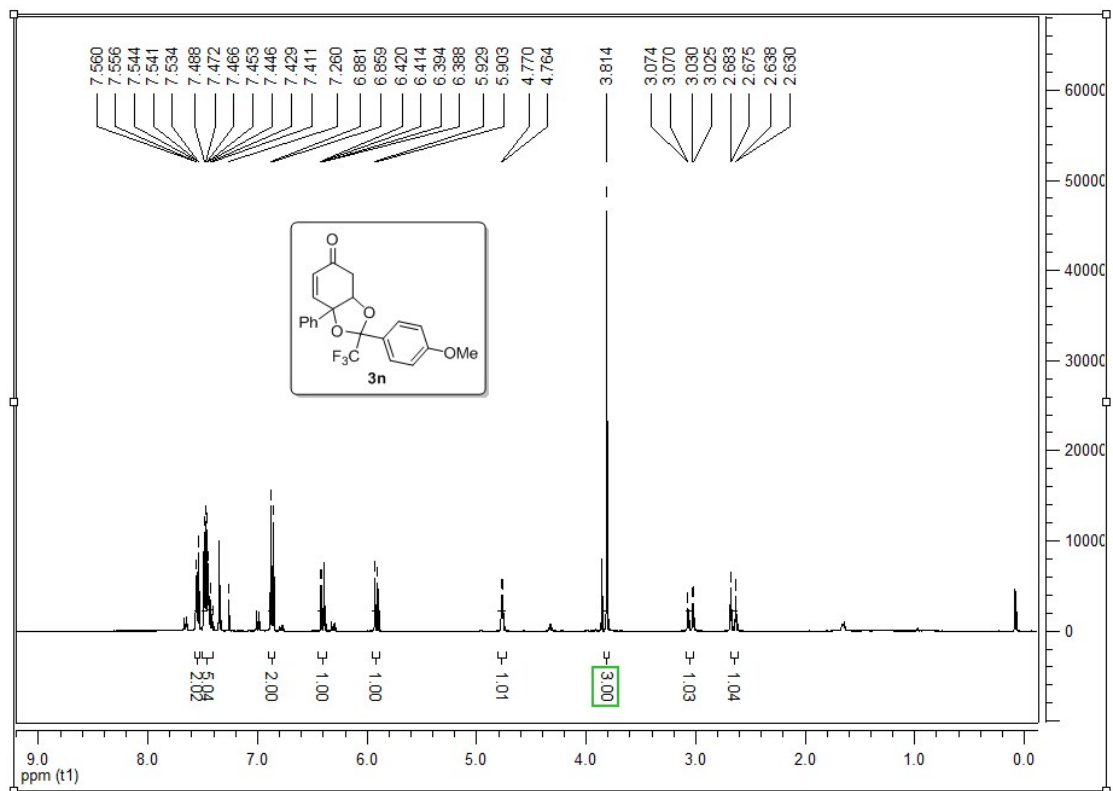

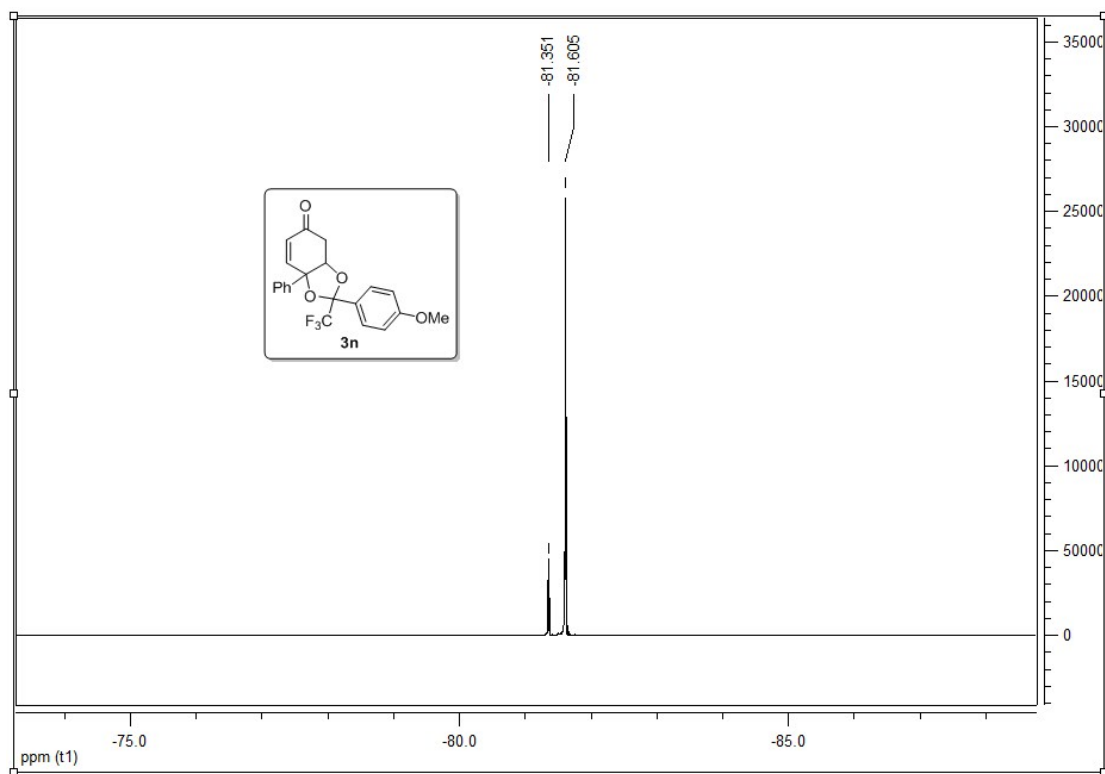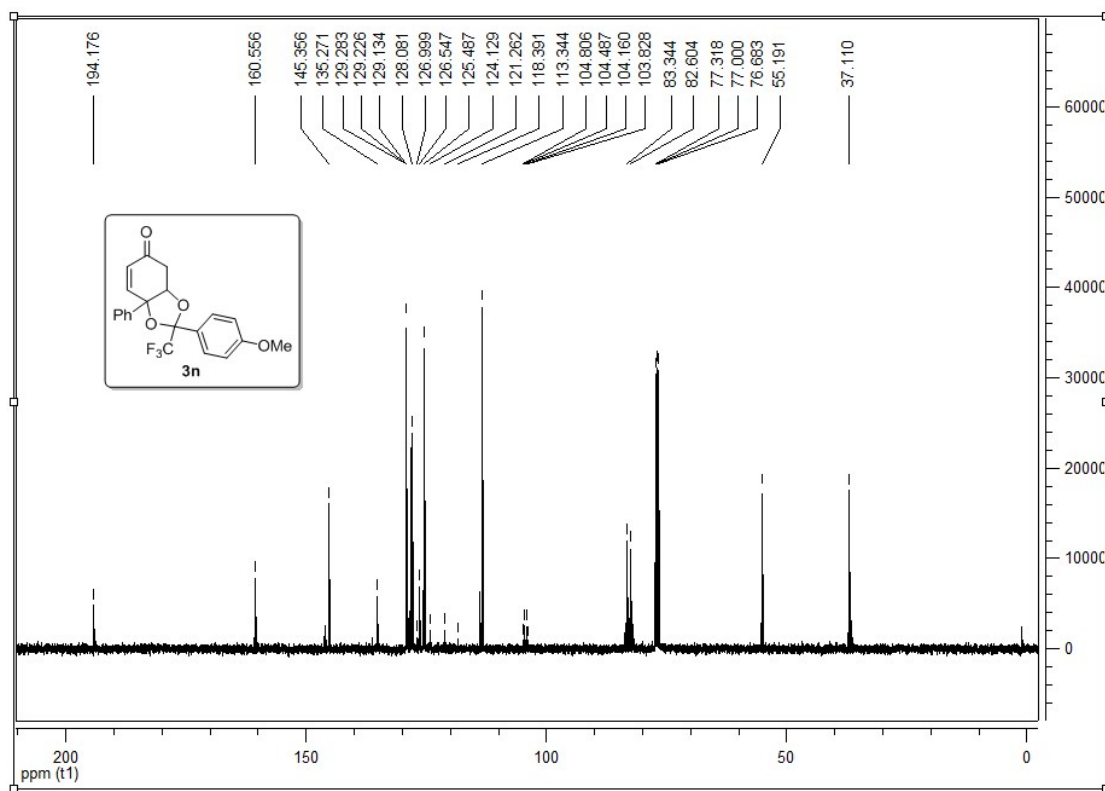

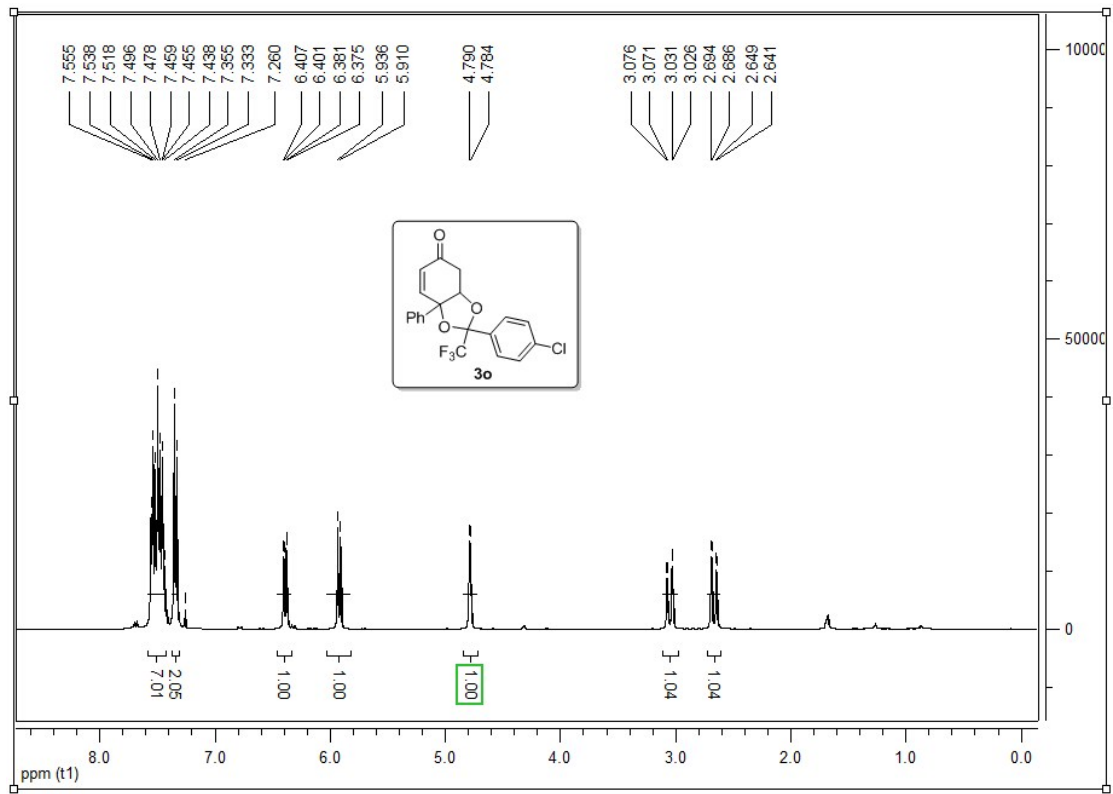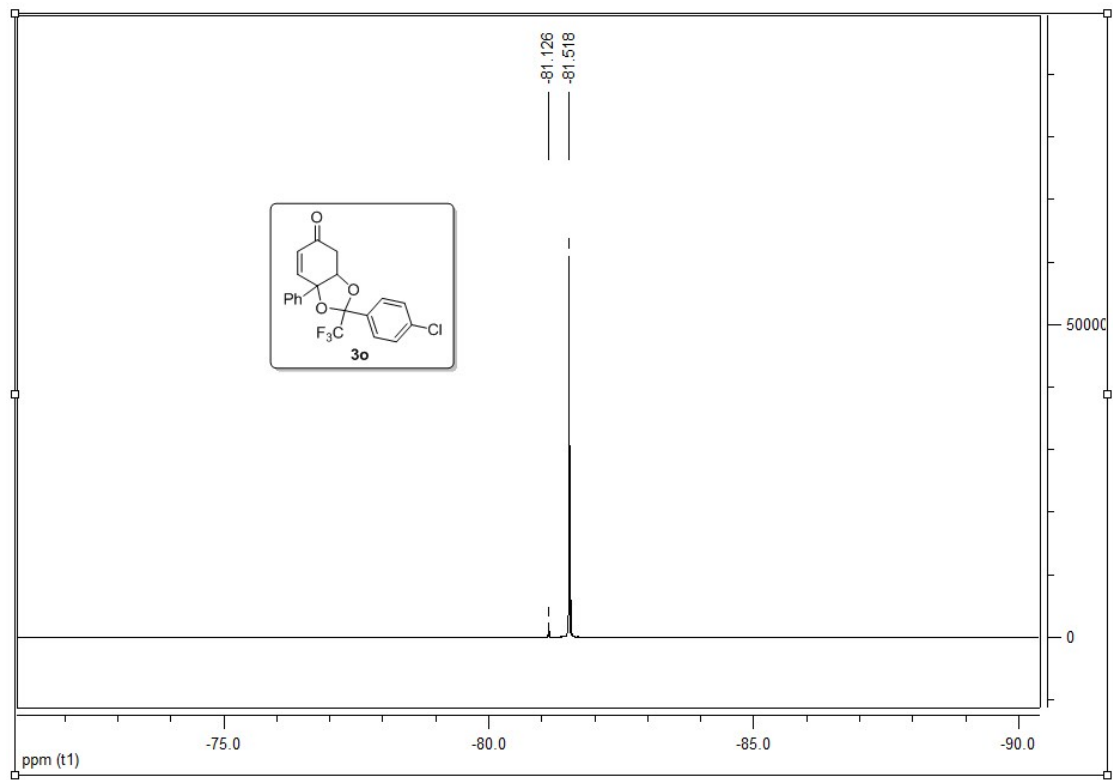

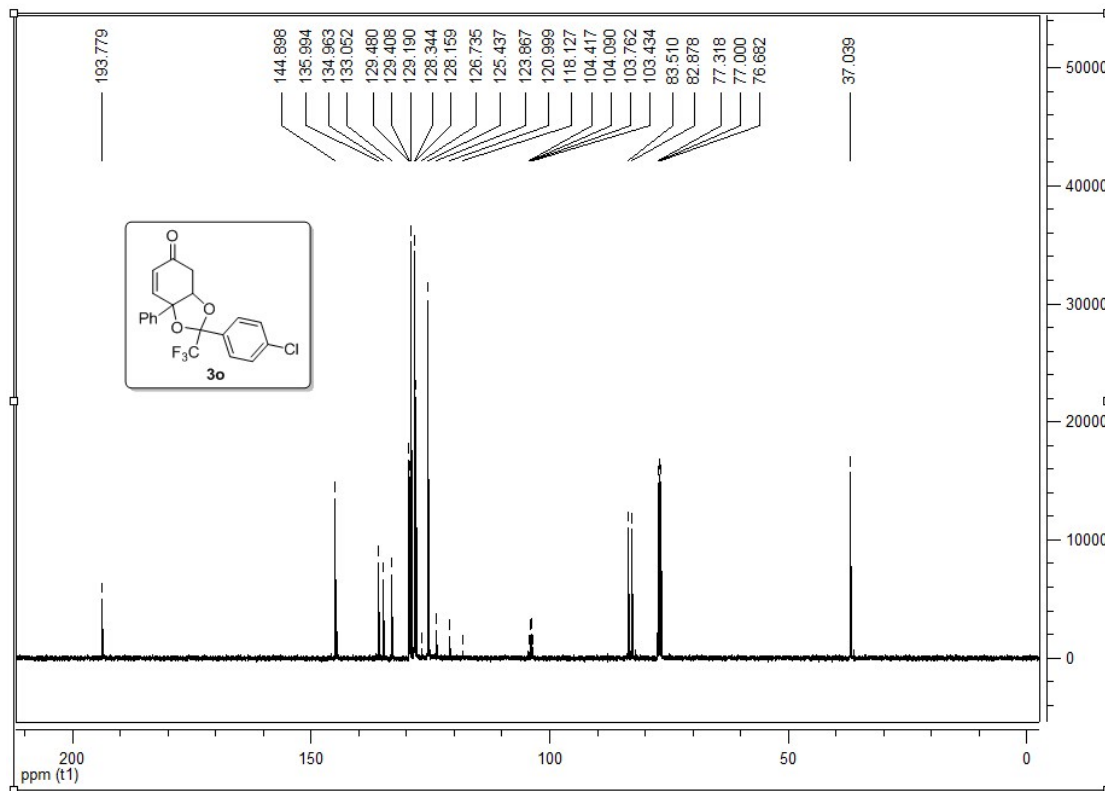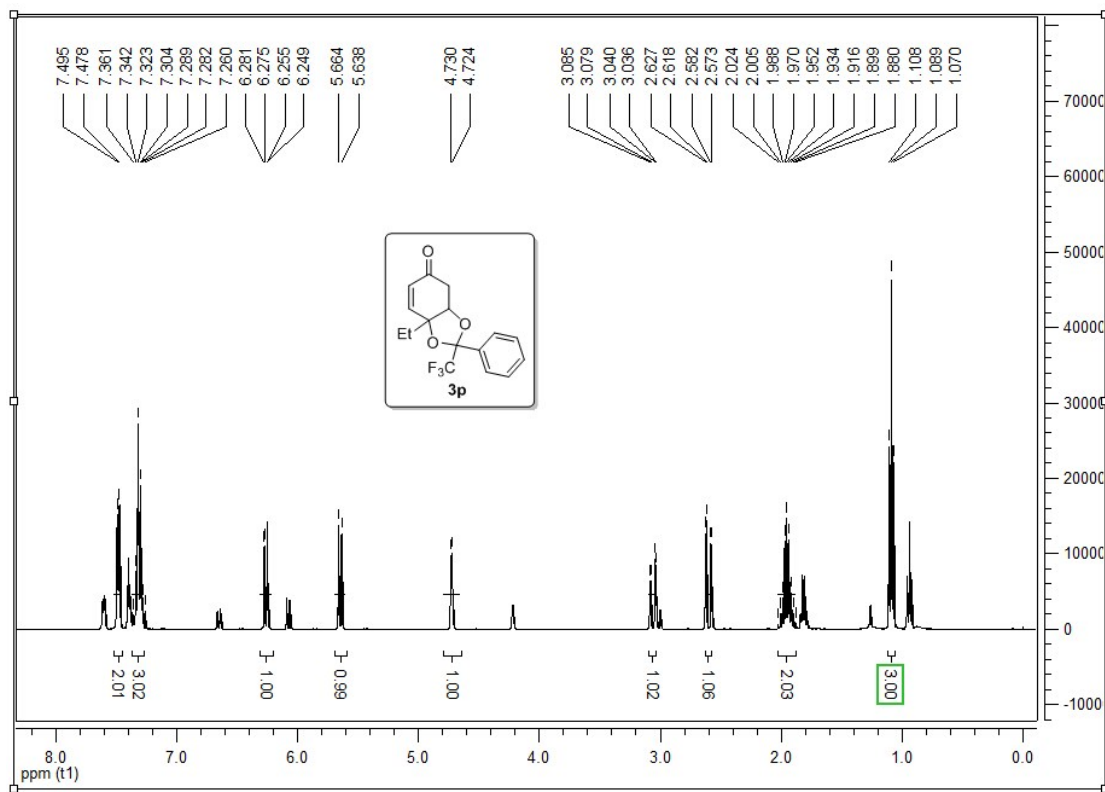



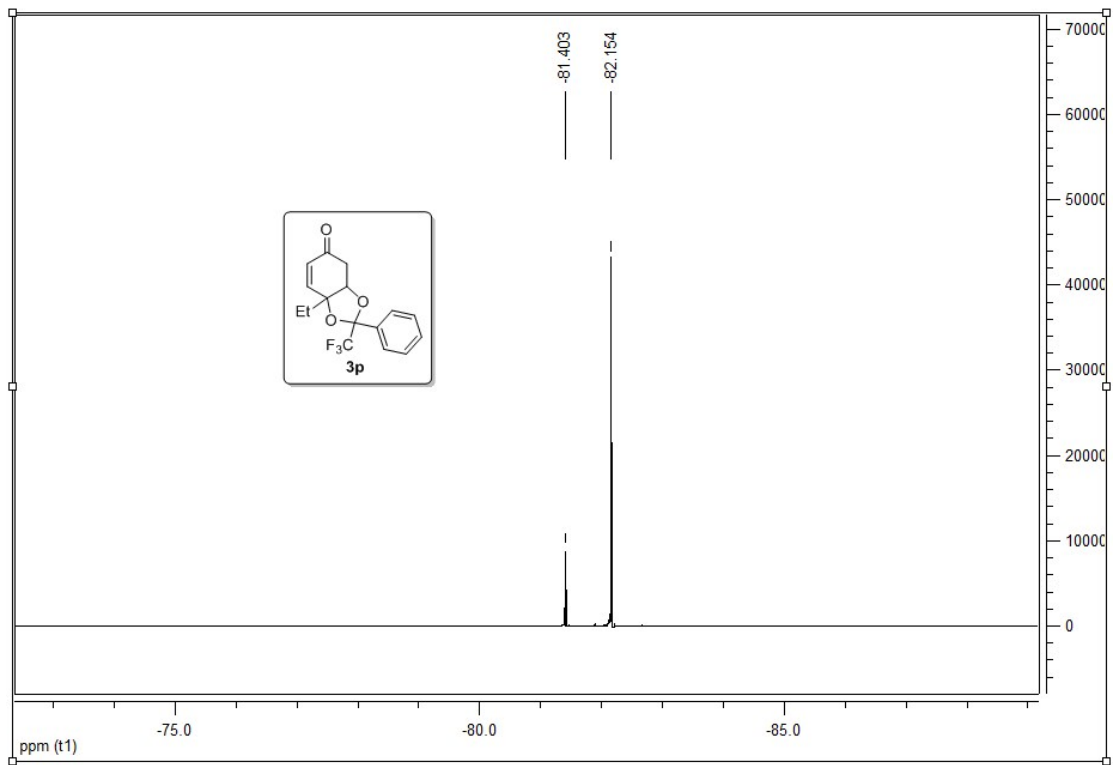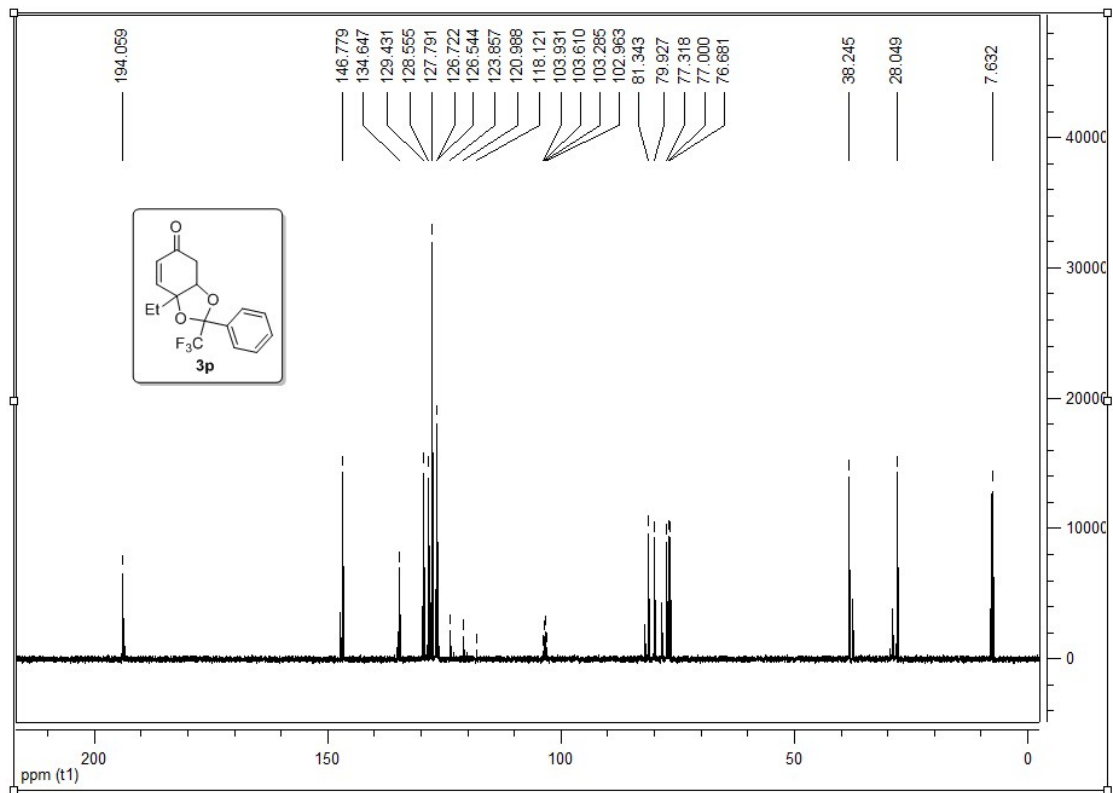

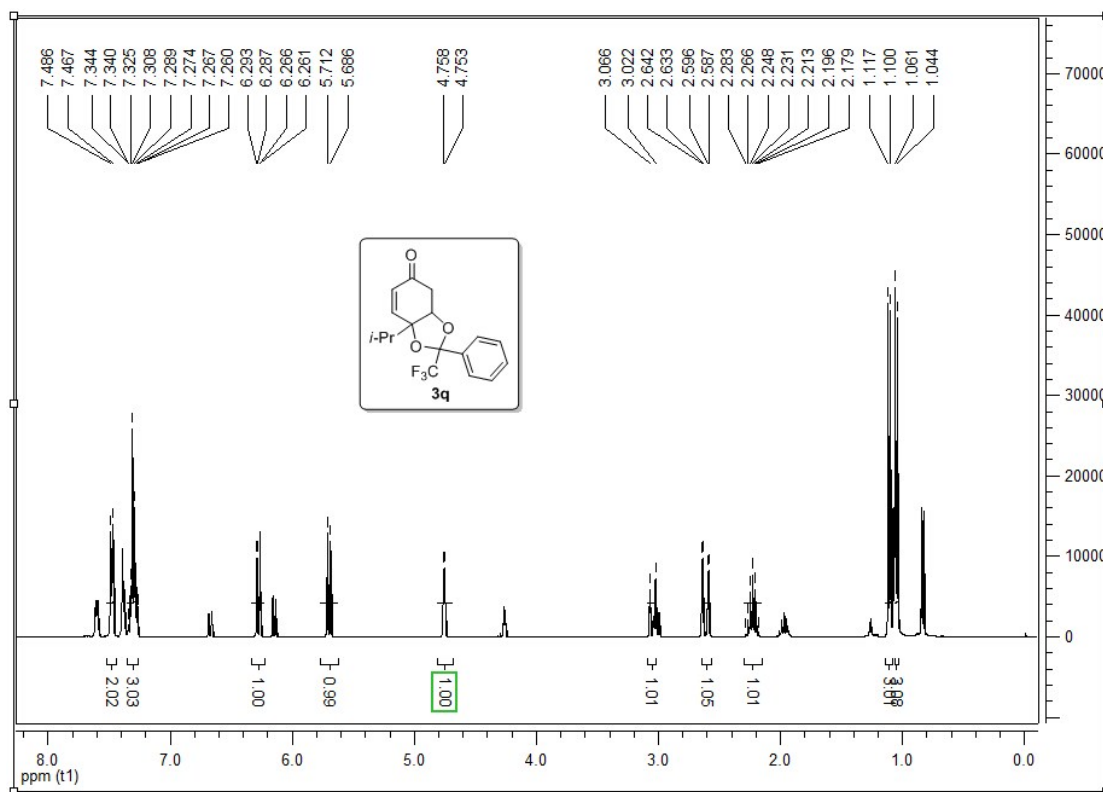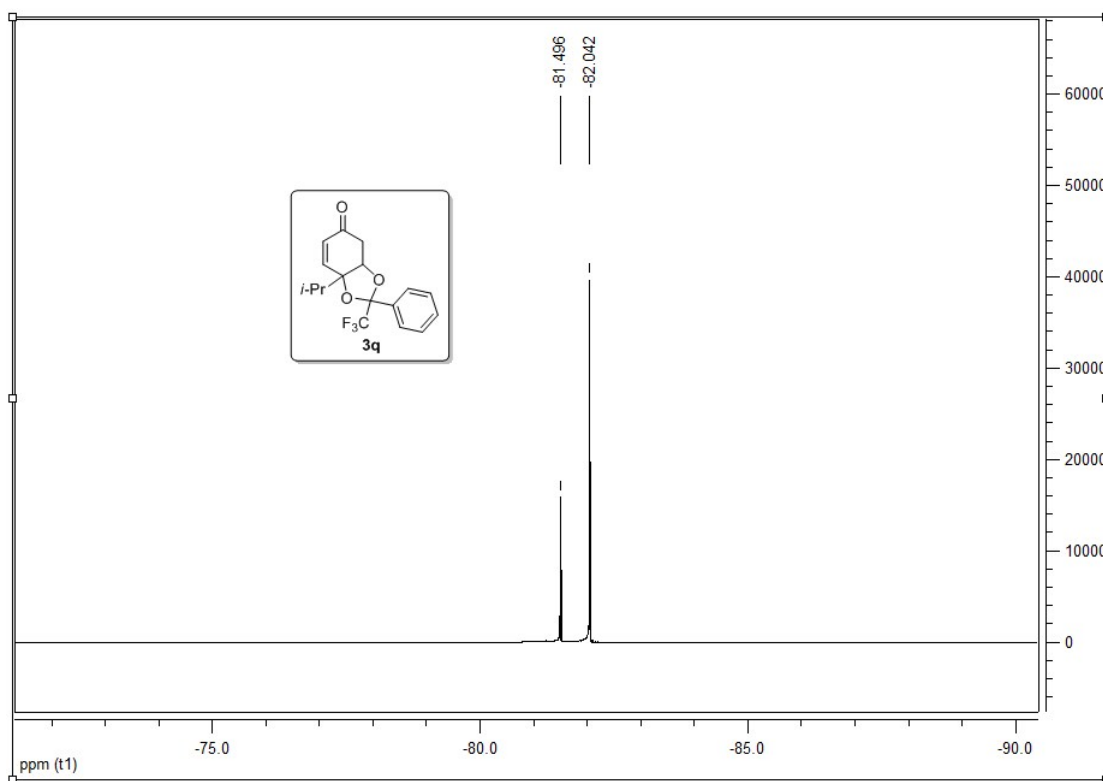

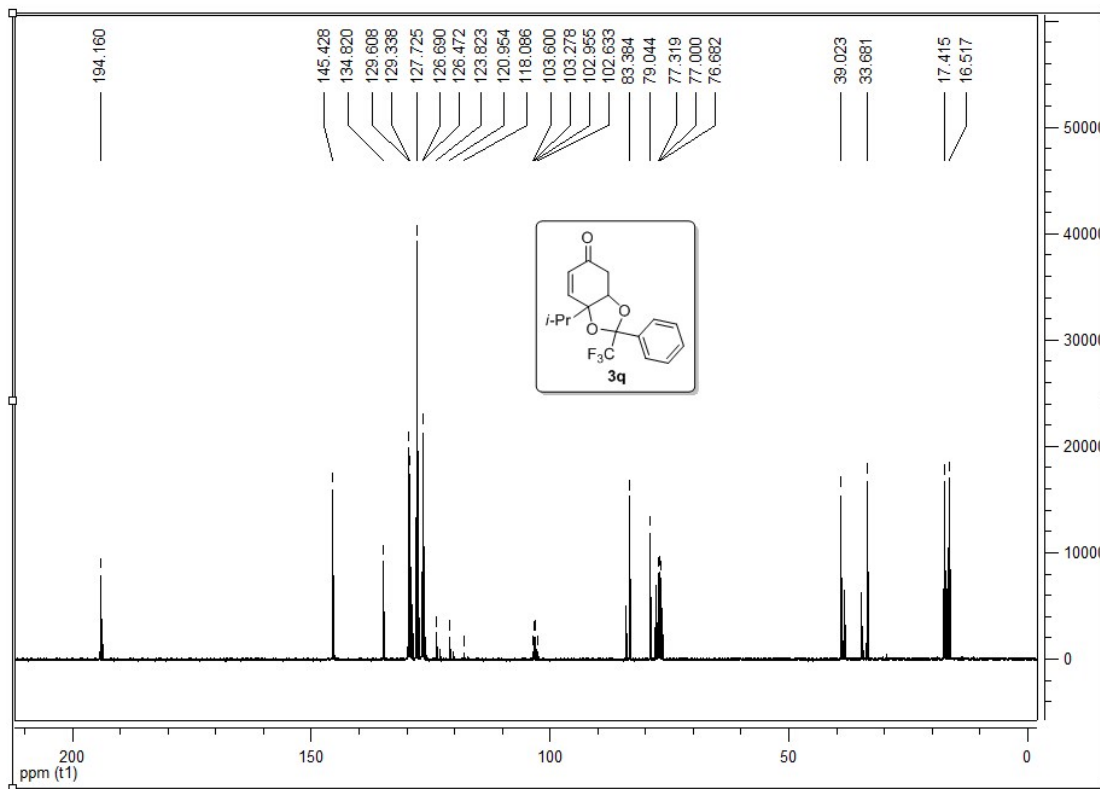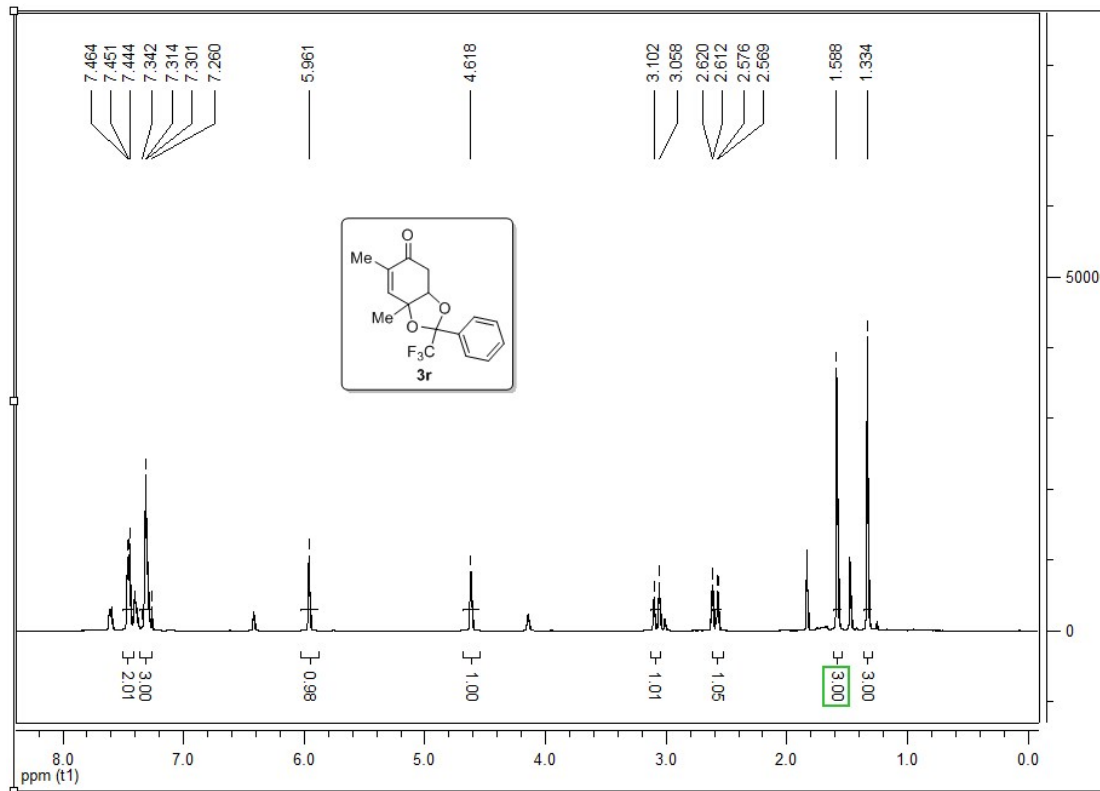

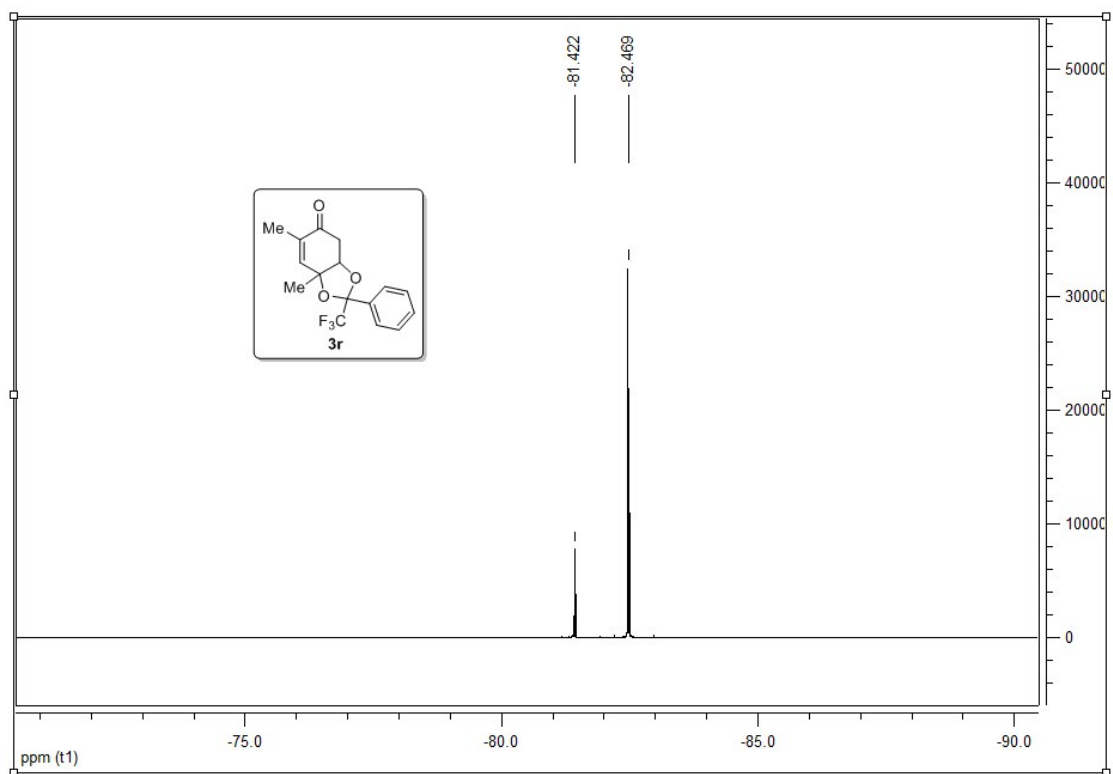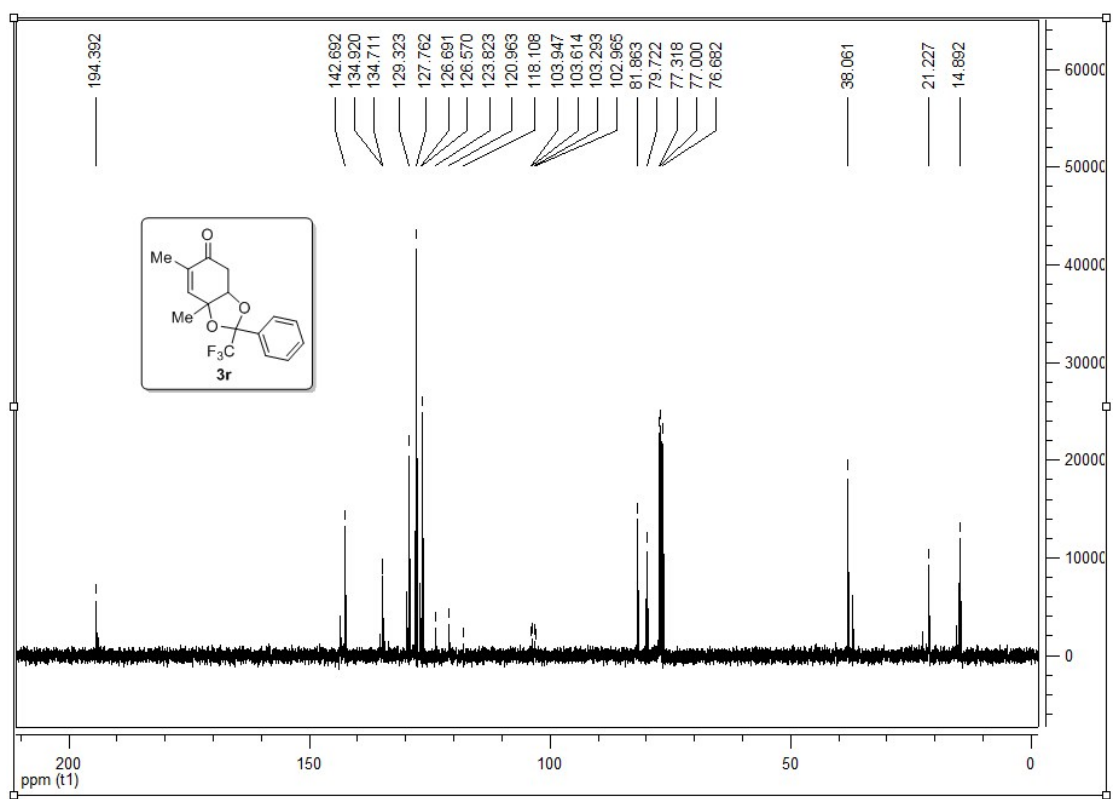

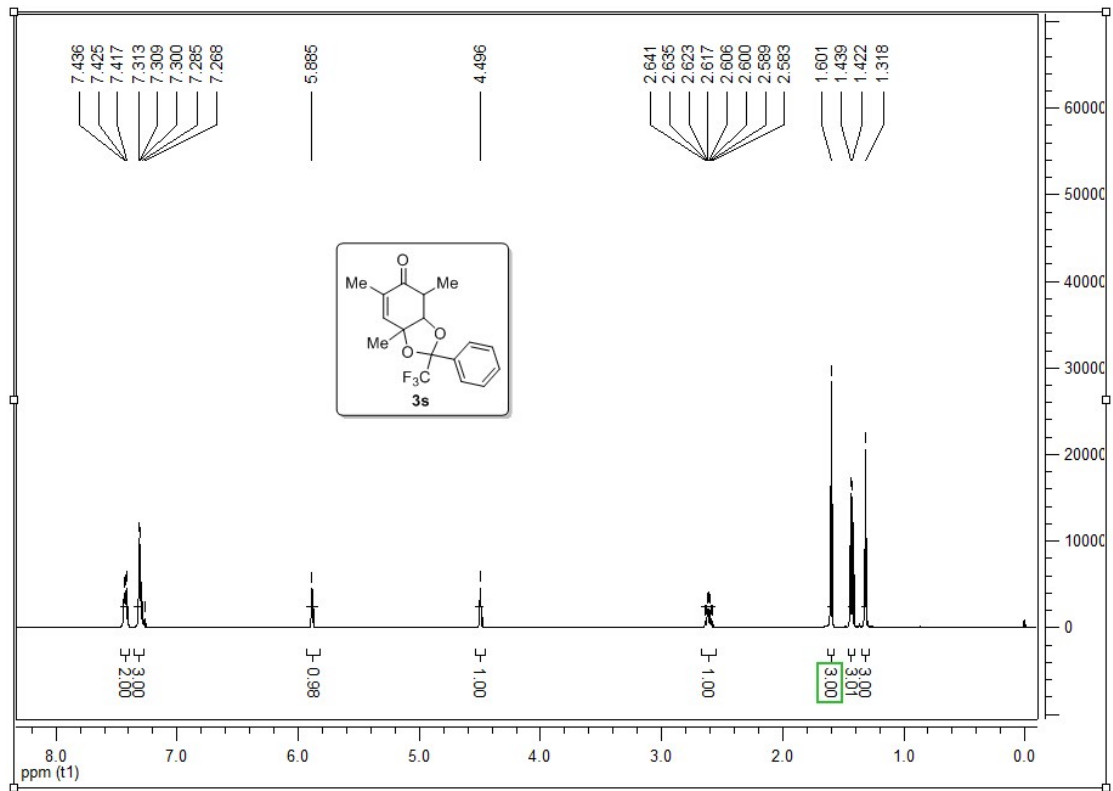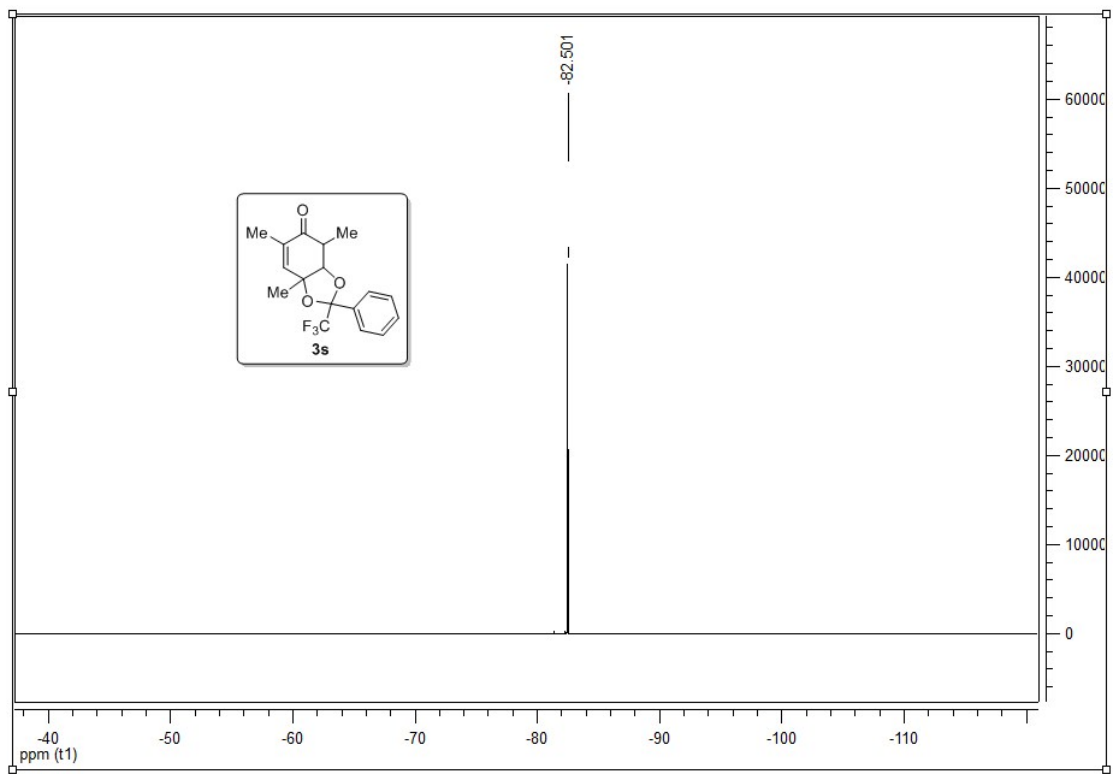

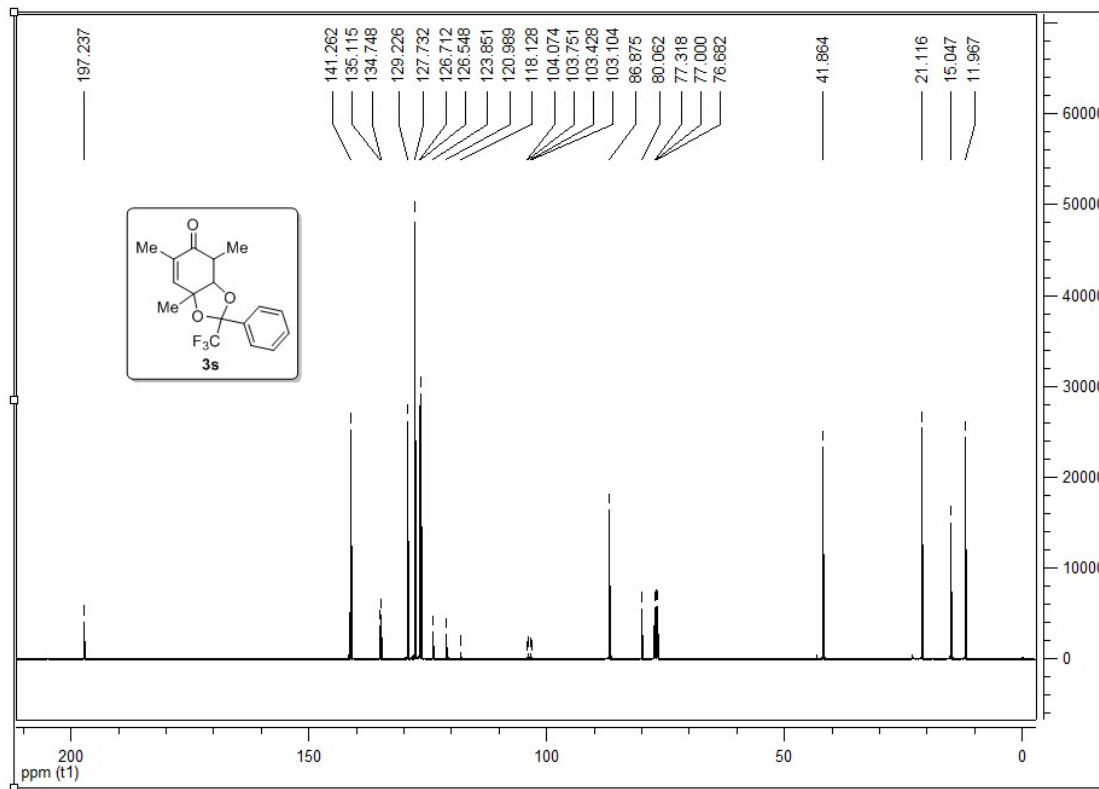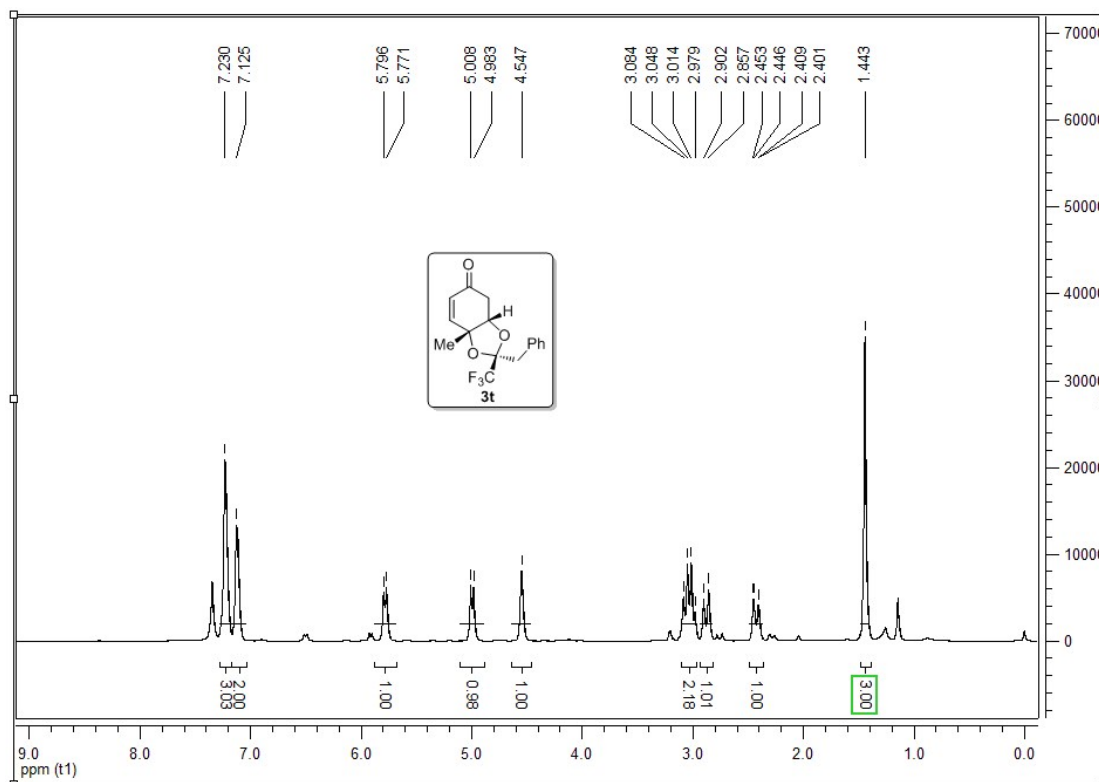

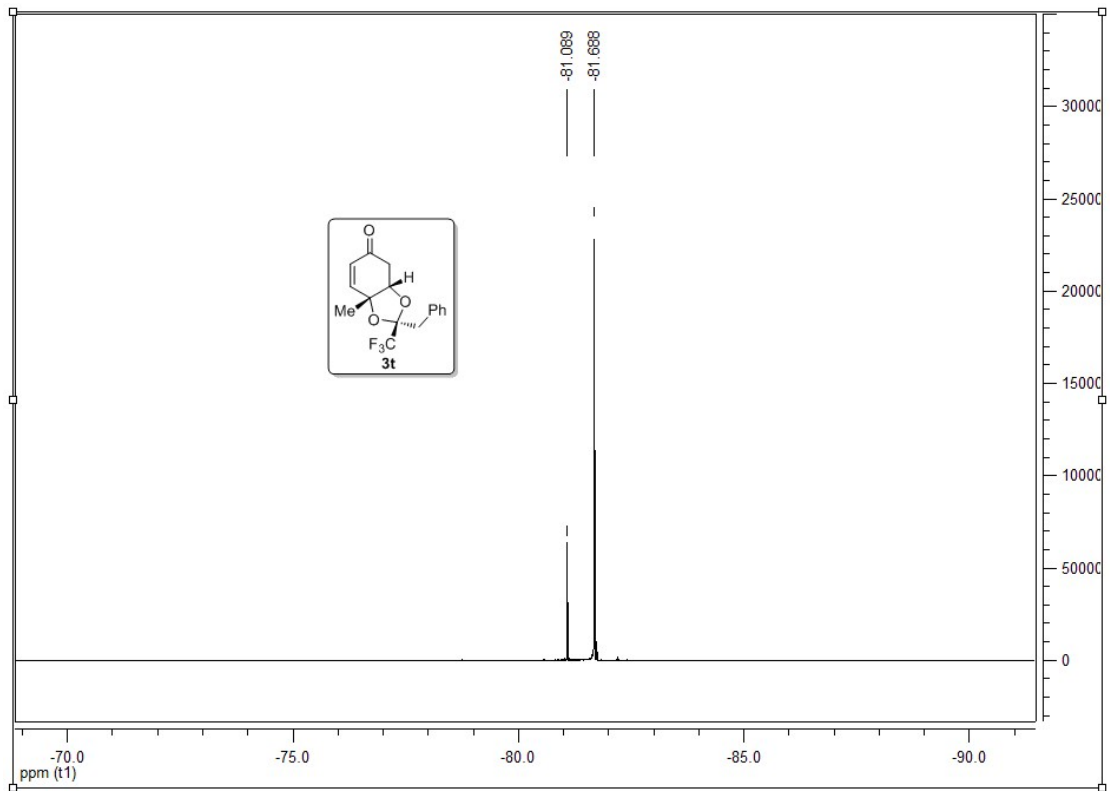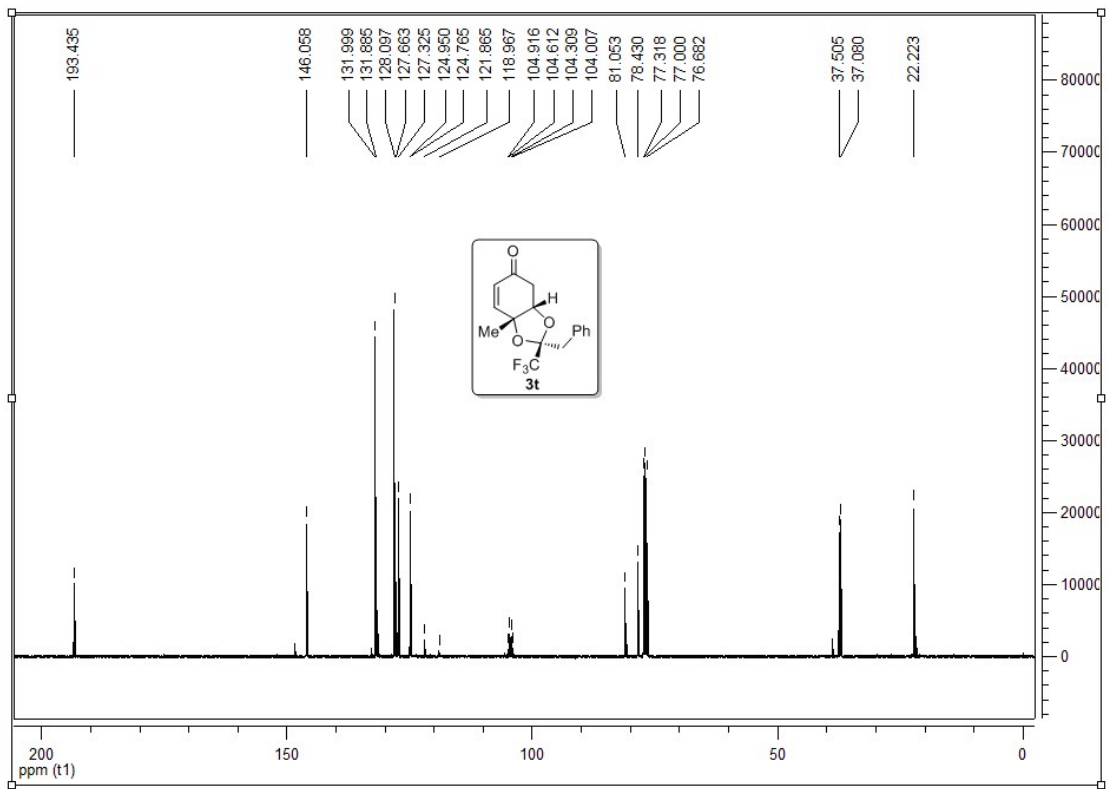

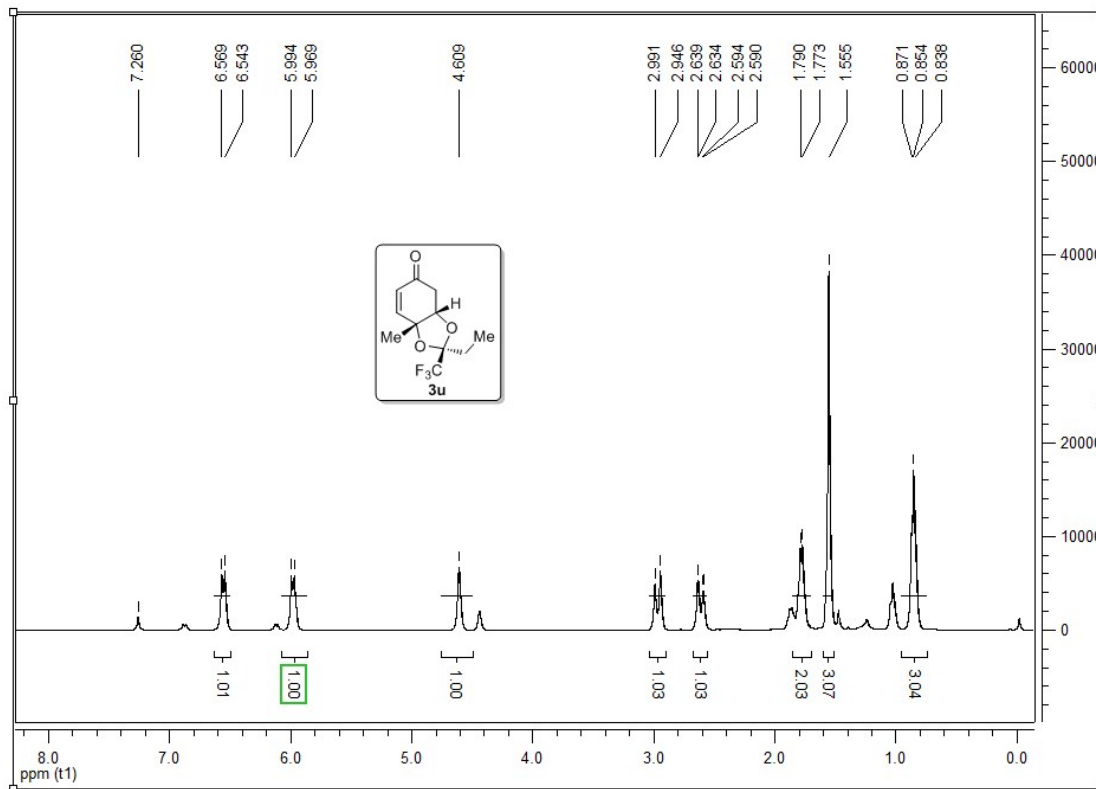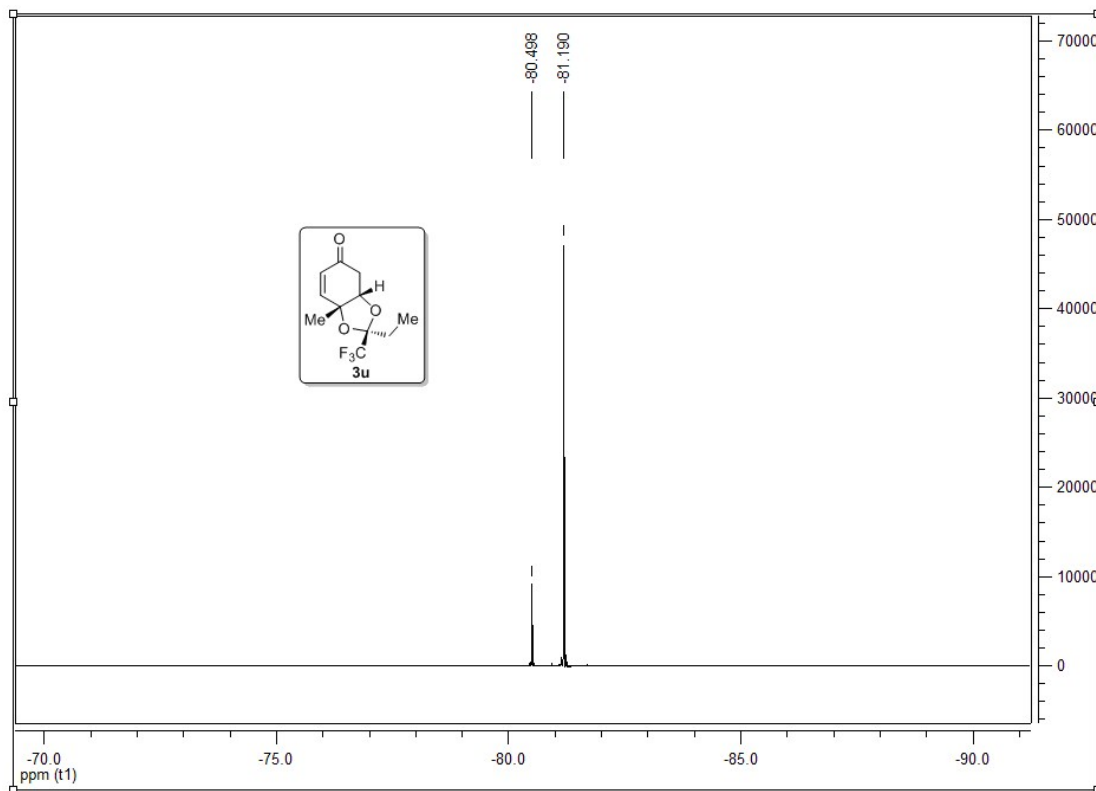



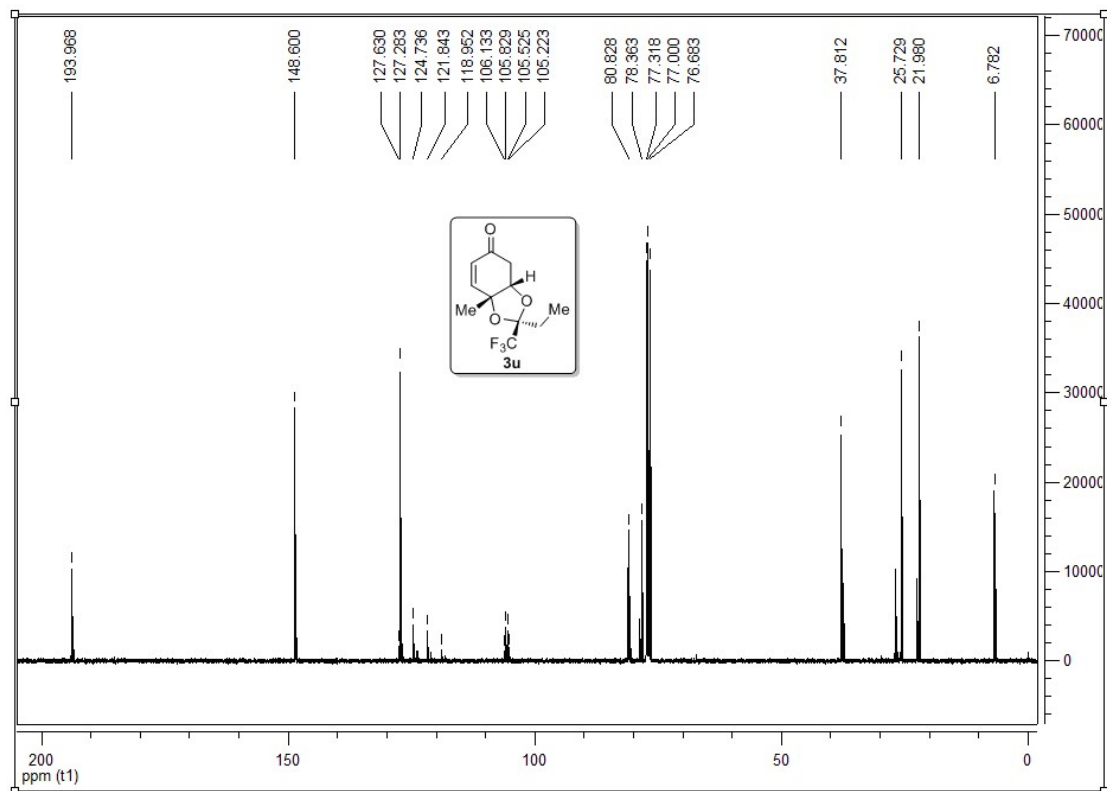

### X-Ray Analysis for the product 3a:

CCDC 1061550 contains the supplementary crystallographic data for the product 3a.

These data can be obtained free of charge from The Cambridge Crystallographic Data

Center via [www.ccdc.cam.ac.uk/data\\_request/cif](http://www.ccdc.cam.ac.uk/data_request/cif).

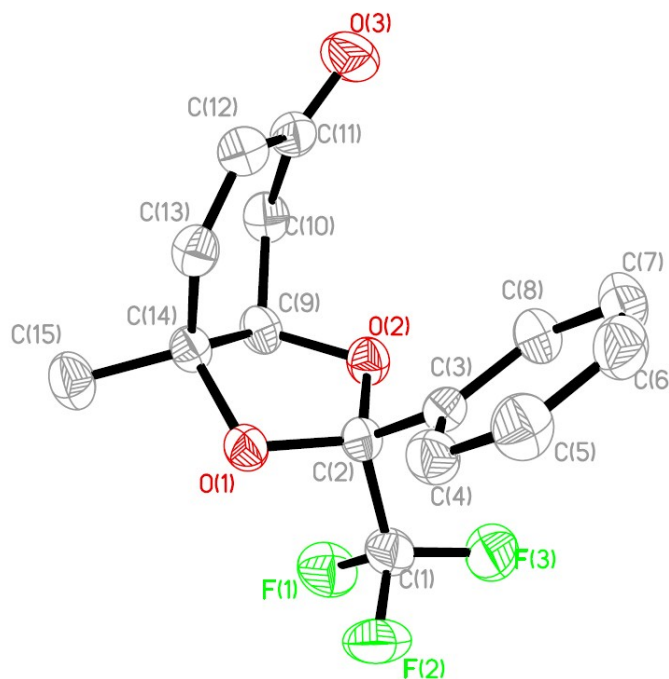

Table 1. Crystal data and structure refinement for 130703A.

|                                 |                                                                                                                       |
|---------------------------------|-----------------------------------------------------------------------------------------------------------------------|
| Empirical formula               | C <sub>15</sub> H <sub>13</sub> F <sub>3</sub> O <sub>3</sub>                                                         |
| Formula weight                  | 298.25                                                                                                                |
| Temperature                     | 294(2) K                                                                                                              |
| Wavelength                      | 0.71073 Å                                                                                                             |
| Crystal system, space group     | MONOCLINIC, C <sub>2</sub> /c                                                                                         |
| Unit cell dimensions            | a = 28.78(3) Å    alpha = 90 deg.<br>b = 6.621(7) Å    beta = 106.775(15) deg.<br>c = 15.245(18) Å    gamma = 90 deg. |
| Volume                          | 2782(5) Å <sup>3</sup>                                                                                                |
| Z, Calculated density           | 8, 1.424 Mg/m <sup>3</sup>                                                                                            |
| Absorption coefficient          | 0.124 mm <sup>-1</sup>                                                                                                |
| F(000)                          | 1232                                                                                                                  |
| Crystal size                    | 0.17 x 0.14 x 0.05 mm                                                                                                 |
| Theta range for data collection | 3.16 to 25.03 deg.                                                                                                    |
| Limiting indices                | -34<=h<=34, -7<=k<=7, -18<=l<=18                                                                                      |
| Reflections collected / unique  | 11489 / 2448 [R(int) = 0.0959]                                                                                        |
| Completeness to theta = 25.03   | 99.6 %                                                                                                                |

|                                   |                                             |
|-----------------------------------|---------------------------------------------|
| Absorption correction             | Semi-empirical from equivalents             |
| Max. and min. transmission        | 0.9938 and 0.9792                           |
| Refinement method                 | Full-matrix least-squares on F <sup>2</sup> |
| Data / restraints / parameters    | 2448 / 0 / 192                              |
| Goodness-of-fit on F <sup>2</sup> | 1.055                                       |
| Final R indices [I>2sigma(I)]     | R1 = 0.0545, wR2 = 0.1312                   |
| R indices (all data)              | R1 = 0.0833, wR2 = 0.1499                   |
| Extinction coefficient            | 0.0005(5)                                   |
| Largest diff. peak and hole       | 0.161 and -0.166 e.A <sup>-3</sup>          |

Table 2. Atomic coordinates (  $\times 10^4$ ) and equivalent isotropic displacement parameters ( $\text{Å}^2 \times 10^3$ ) for 130703A.  $U(\text{eq})$  is defined as one third of the trace of the orthogonalized  $U_{ij}$  tensor.

|       | x       | y       | z       | U(eq) |
|-------|---------|---------|---------|-------|
| C(1)  | 2042(1) | 2269(5) | 8616(2) | 65(1) |
| C(2)  | 1577(1) | 2492(3) | 7820(2) | 48(1) |
| C(3)  | 1137(1) | 1870(3) | 8099(2) | 48(1) |
| C(4)  | 1014(1) | -139(4) | 8128(2) | 63(1) |
| C(5)  | 609(1)  | -660(5) | 8397(2) | 74(1) |
| C(6)  | 330(1)  | 777(5)  | 8632(2) | 73(1) |
| C(7)  | 449(1)  | 2758(5) | 8601(2) | 72(1) |
| C(8)  | 851(1)  | 3316(4) | 8345(2) | 62(1) |
| C(9)  | 1650(1) | 4654(4) | 6683(2) | 53(1) |
| C(10) | 1351(1) | 6342(4) | 6137(2) | 59(1) |
| C(11) | 816(1)  | 5891(4) | 5876(2) | 58(1) |
| C(12) | 678(1)  | 3796(4) | 5636(2) | 58(1) |
| C(13) | 994(1)  | 2305(4) | 5820(2) | 54(1) |
| C(14) | 1525(1) | 2555(3) | 6283(2) | 47(1) |
| C(15) | 1828(1) | 1870(4) | 5678(2) | 72(1) |
| F(1)  | 2429(1) | 2921(3) | 8396(1) | 87(1) |
| F(2)  | 2132(1) | 356(3)  | 8878(1) | 89(1) |
| F(3)  | 2013(1) | 3313(3) | 9338(1) | 95(1) |
| O(1)  | 1653(1) | 1312(2) | 7101(1) | 53(1) |
| O(2)  | 1541(1) | 4519(2) | 7542(1) | 54(1) |
| O(3)  | 520(1)  | 7210(3) | 5853(2) | 85(1) |

Table 3. Bond lengths [Å] and angles [deg] for 130703A.

|           |          |
|-----------|----------|
| C(1)-F(3) | 1.323(3) |
| C(1)-F(1) | 1.325(3) |
| C(1)-F(2) | 1.331(4) |
| C(1)-C(2) | 1.532(4) |
| C(2)-O(2) | 1.402(3) |
| C(2)-O(1) | 1.413(3) |

|                |            |
|----------------|------------|
| C(2)-C(3)      | 1.505(4)   |
| C(3)-C(4)      | 1.381(4)   |
| C(3)-C(8)      | 1.384(4)   |
| C(4)-C(5)      | 1.384(4)   |
| C(4)-H(4)      | 0.9300     |
| C(5)-C(6)      | 1.360(4)   |
| C(5)-H(5)      | 0.9300     |
| C(6)-C(7)      | 1.361(4)   |
| C(6)-H(6)      | 0.9300     |
| C(7)-C(8)      | 1.373(4)   |
| C(7)-H(7)      | 0.9300     |
| C(8)-H(8)      | 0.9300     |
| C(9)-O(2)      | 1.435(3)   |
| C(9)-C(10)     | 1.506(4)   |
| C(9)-C(14)     | 1.518(3)   |
| C(9)-H(9)      | 0.9800     |
| C(10)-C(11)    | 1.507(4)   |
| C(10)-H(10A)   | 0.9700     |
| C(10)-H(10B)   | 0.9700     |
| C(11)-O(3)     | 1.213(3)   |
| C(11)-C(12)    | 1.460(4)   |
| C(12)-C(13)    | 1.317(4)   |
| C(12)-H(12)    | 0.9300     |
| C(13)-C(14)    | 1.495(4)   |
| C(13)-H(13)    | 0.9300     |
| C(14)-O(1)     | 1.451(3)   |
| C(14)-C(15)    | 1.510(4)   |
| C(15)-H(15A)   | 0.9600     |
| C(15)-H(15B)   | 0.9600     |
| C(15)-H(15C)   | 0.9600     |
| F(3)-C(1)-F(1) | 107.5(2)   |
| F(3)-C(1)-F(2) | 107.6(3)   |
| F(1)-C(1)-F(2) | 106.3(2)   |
| F(3)-C(1)-C(2) | 111.0(2)   |
| F(1)-C(1)-C(2) | 112.0(2)   |
| F(2)-C(1)-C(2) | 112.3(2)   |
| O(2)-C(2)-O(1) | 107.99(19) |
| O(2)-C(2)-C(3) | 110.61(18) |
| O(1)-C(2)-C(3) | 113.4(2)   |
| O(2)-C(2)-C(1) | 107.7(2)   |
| O(1)-C(2)-C(1) | 105.4(2)   |
| C(3)-C(2)-C(1) | 111.4(2)   |
| C(4)-C(3)-C(8) | 118.5(3)   |
| C(4)-C(3)-C(2) | 121.3(2)   |

|                     |            |
|---------------------|------------|
| C(8)-C(3)-C(2)      | 120.2(2)   |
| C(3)-C(4)-C(5)      | 119.8(2)   |
| C(3)-C(4)-H(4)      | 120.1      |
| C(5)-C(4)-H(4)      | 120.1      |
| C(6)-C(5)-C(4)      | 121.1(3)   |
| C(6)-C(5)-H(5)      | 119.5      |
| C(4)-C(5)-H(5)      | 119.5      |
| C(7)-C(6)-C(5)      | 119.4(3)   |
| C(7)-C(6)-H(6)      | 120.3      |
| C(5)-C(6)-H(6)      | 120.3      |
| C(6)-C(7)-C(8)      | 120.7(3)   |
| C(6)-C(7)-H(7)      | 119.6      |
| C(8)-C(7)-H(7)      | 119.6      |
| C(7)-C(8)-C(3)      | 120.5(3)   |
| C(7)-C(8)-H(8)      | 119.7      |
| C(3)-C(8)-H(8)      | 119.7      |
| O(2)-C(9)-C(10)     | 108.0(2)   |
| O(2)-C(9)-C(14)     | 102.73(18) |
| C(10)-C(9)-C(14)    | 115.2(2)   |
| O(2)-C(9)-H(9)      | 110.2      |
| C(10)-C(9)-H(9)     | 110.2      |
| C(14)-C(9)-H(9)     | 110.2      |
| C(11)-C(10)-C(9)    | 112.1(2)   |
| C(11)-C(10)-H(10A)  | 109.2      |
| C(9)-C(10)-H(10A)   | 109.2      |
| C(11)-C(10)-H(10B)  | 109.2      |
| C(9)-C(10)-H(10B)   | 109.2      |
| H(10A)-C(10)-H(10B) | 107.9      |
| O(3)-C(11)-C(12)    | 122.6(3)   |
| O(3)-C(11)-C(10)    | 121.4(3)   |
| C(12)-C(11)-C(10)   | 116.0(2)   |
| C(13)-C(12)-C(11)   | 122.5(3)   |
| C(13)-C(12)-H(12)   | 118.7      |
| C(11)-C(12)-H(12)   | 118.7      |
| C(12)-C(13)-C(14)   | 124.5(2)   |
| C(12)-C(13)-H(13)   | 117.7      |
| C(14)-C(13)-H(13)   | 117.7      |
| O(1)-C(14)-C(13)    | 108.32(18) |
| O(1)-C(14)-C(15)    | 107.9(2)   |
| C(13)-C(14)-C(15)   | 111.6(2)   |
| O(1)-C(14)-C(9)     | 101.65(19) |
| C(13)-C(14)-C(9)    | 112.5(2)   |
| C(15)-C(14)-C(9)    | 114.1(2)   |
| C(14)-C(15)-H(15A)  | 109.5      |

|                     |            |
|---------------------|------------|
| C(14)-C(15)-H(15B)  | 109.5      |
| H(15A)-C(15)-H(15B) | 109.5      |
| C(14)-C(15)-H(15C)  | 109.5      |
| H(15A)-C(15)-H(15C) | 109.5      |
| H(15B)-C(15)-H(15C) | 109.5      |
| C(2)-O(1)-C(14)     | 107.19(18) |
| C(2)-O(2)-C(9)      | 108.61(16) |

Symmetry transformations used to generate equivalent atoms:

Table 4. Anisotropic displacement parameters ( $\text{Å}^2 \times 10^3$ ) for 130703A. The anisotropic displacement factor exponent takes the form:  $-2 \pi^2 [ h^2 a^{*2} U_{11} + \dots + 2 h k a^* b^* U_{12} ]$

|       | U11   | U22    | U33    | U23    | U13   | U12   |
|-------|-------|--------|--------|--------|-------|-------|
| C(1)  | 48(2) | 80(2)  | 65(2)  | -4(2)  | 13(1) | 7(1)  |
| C(2)  | 53(1) | 46(1)  | 46(1)  | -5(1)  | 15(1) | 4(1)  |
| C(3)  | 49(1) | 54(1)  | 39(1)  | -1(1)  | 10(1) | 2(1)  |
| C(4)  | 71(2) | 56(2)  | 68(2)  | 6(1)   | 28(2) | 7(1)  |
| C(5)  | 82(2) | 65(2)  | 83(2)  | 7(2)   | 35(2) | -7(2) |
| C(6)  | 63(2) | 95(2)  | 66(2)  | 1(2)   | 28(2) | -6(2) |
| C(7)  | 66(2) | 84(2)  | 74(2)  | -10(2) | 34(2) | 4(2)  |
| C(8)  | 65(2) | 59(2)  | 67(2)  | -8(1)  | 26(1) | 3(1)  |
| C(9)  | 50(1) | 51(1)  | 62(2)  | -5(1)  | 26(1) | -5(1) |
| C(10) | 76(2) | 41(1)  | 67(2)  | 3(1)   | 31(1) | -4(1) |
| C(11) | 67(2) | 56(2)  | 52(1)  | 7(1)   | 18(1) | 9(1)  |
| C(12) | 58(2) | 56(2)  | 58(1)  | 2(1)   | 15(1) | -3(1) |
| C(13) | 62(2) | 46(1)  | 53(1)  | -5(1)  | 18(1) | -7(1) |
| C(14) | 55(1) | 41(1)  | 53(1)  | 3(1)   | 25(1) | 1(1)  |
| C(15) | 88(2) | 65(2)  | 78(2)  | 3(2)   | 48(2) | 9(2)  |
| F(1)  | 49(1) | 107(1) | 100(1) | -4(1)  | 16(1) | -3(1) |
| F(2)  | 73(1) | 95(1)  | 88(1)  | 27(1)  | 6(1)  | 22(1) |
| F(3)  | 71(1) | 141(2) | 62(1)  | -27(1) | -1(1) | 14(1) |
| O(1)  | 63(1) | 47(1)  | 53(1)  | 1(1)   | 22(1) | 9(1)  |
| O(2)  | 62(1) | 48(1)  | 55(1)  | -5(1)  | 21(1) | 0(1)  |
| O(3)  | 85(2) | 68(1)  | 95(2)  | -2(1)  | 17(1) | 26(1) |

Table 5. Hydrogen coordinates ( $\times 10^4$ ) and isotropic displacement parameters ( $\text{Å}^2 \times 10^3$ ) for 130703A.

|      | x    | y     | z    | U(eq) |
|------|------|-------|------|-------|
| H(4) | 1201 | -1138 | 7968 | 76    |
| H(5) | 527  | -2015 | 8416 | 89    |
| H(6) | 59   | 409   | 8813 | 87    |

|        |      |      |      |     |
|--------|------|------|------|-----|
| H(7)   | 257  | 3746 | 8756 | 86  |
| H(8)   | 930  | 4675 | 8336 | 75  |
| H(9)   | 1997 | 4925 | 6786 | 63  |
| H(10A) | 1415 | 7575 | 6496 | 71  |
| H(10B) | 1448 | 6562 | 5586 | 71  |
| H(12)  | 354  | 3503 | 5343 | 69  |
| H(13)  | 880  | 1007 | 5649 | 64  |
| H(15A) | 2165 | 1918 | 6017 | 108 |
| H(15B) | 1770 | 2744 | 5155 | 108 |
| H(15C) | 1740 | 511  | 5477 | 108 |

Table 6. Torsion angles [deg] for 130703A.

|                         |             |
|-------------------------|-------------|
| F(3)-C(1)-C(2)-O(2)     | 65.1(3)     |
| F(1)-C(1)-C(2)-O(2)     | -54.9(3)    |
| F(2)-C(1)-C(2)-O(2)     | -174.47(19) |
| F(3)-C(1)-C(2)-O(1)     | -179.7(2)   |
| F(1)-C(1)-C(2)-O(1)     | 60.2(3)     |
| F(2)-C(1)-C(2)-O(1)     | -59.3(3)    |
| F(3)-C(1)-C(2)-C(3)     | -56.3(3)    |
| F(1)-C(1)-C(2)-C(3)     | -176.4(2)   |
| F(2)-C(1)-C(2)-C(3)     | 64.1(3)     |
| O(2)-C(2)-C(3)-C(4)     | 159.9(2)    |
| O(1)-C(2)-C(3)-C(4)     | 38.4(3)     |
| C(1)-C(2)-C(3)-C(4)     | -80.4(3)    |
| O(2)-C(2)-C(3)-C(8)     | -21.0(3)    |
| O(1)-C(2)-C(3)-C(8)     | -142.5(2)   |
| C(1)-C(2)-C(3)-C(8)     | 98.7(3)     |
| C(8)-C(3)-C(4)-C(5)     | 0.2(4)      |
| C(2)-C(3)-C(4)-C(5)     | 179.3(2)    |
| C(3)-C(4)-C(5)-C(6)     | 0.1(5)      |
| C(4)-C(5)-C(6)-C(7)     | 0.1(5)      |
| C(5)-C(6)-C(7)-C(8)     | -0.7(5)     |
| C(6)-C(7)-C(8)-C(3)     | 1.0(4)      |
| C(4)-C(3)-C(8)-C(7)     | -0.7(4)     |
| C(2)-C(3)-C(8)-C(7)     | -179.9(2)   |
| O(2)-C(9)-C(10)-C(11)   | -65.5(3)    |
| C(14)-C(9)-C(10)-C(11)  | 48.6(3)     |
| C(9)-C(10)-C(11)-O(3)   | 143.8(3)    |
| C(9)-C(10)-C(11)-C(12)  | -37.5(3)    |
| O(3)-C(11)-C(12)-C(13)  | -167.1(3)   |
| C(10)-C(11)-C(12)-C(13) | 14.2(4)     |
| C(11)-C(12)-C(13)-C(14) | -0.3(4)     |
| C(12)-C(13)-C(14)-O(1)  | 122.3(3)    |

|                         |             |
|-------------------------|-------------|
| C(12)-C(13)-C(14)-C(15) | -119.1(3)   |
| C(12)-C(13)-C(14)-C(9)  | 10.7(3)     |
| O(2)-C(9)-C(14)-O(1)    | -33.5(2)    |
| C(10)-C(9)-C(14)-O(1)   | -150.7(2)   |
| O(2)-C(9)-C(14)-C(13)   | 82.1(2)     |
| C(10)-C(9)-C(14)-C(13)  | -35.0(3)    |
| O(2)-C(9)-C(14)-C(15)   | -149.3(2)   |
| C(10)-C(9)-C(14)-C(15)  | 93.5(3)     |
| O(2)-C(2)-O(1)-C(14)    | -16.0(2)    |
| C(3)-C(2)-O(1)-C(14)    | 106.9(2)    |
| C(1)-C(2)-O(1)-C(14)    | -131.0(2)   |
| C(13)-C(14)-O(1)-C(2)   | -88.1(2)    |
| C(15)-C(14)-O(1)-C(2)   | 150.9(2)    |
| C(9)-C(14)-O(1)-C(2)    | 30.6(2)     |
| O(1)-C(2)-O(2)-C(9)     | -6.7(2)     |
| C(3)-C(2)-O(2)-C(9)     | -131.35(19) |
| C(1)-C(2)-O(2)-C(9)     | 106.7(2)    |
| C(10)-C(9)-O(2)-C(2)    | 147.5(2)    |
| C(14)-C(9)-O(2)-C(2)    | 25.3(2)     |

---

Symmetry transformations used to generate equivalent atoms:

Table 7. Hydrogen bonds for 130703A [Å and deg.].

---

| D-H...A | d(D-H) | d(H...A) | d(D...A) | <(DHA) |
|---------|--------|----------|----------|--------|
|---------|--------|----------|----------|--------|
